# Supplementary material for: A Bovine Lymphosarcoma Cell Line Infected with Theileria annulata Exhibits an Irreversible Reconfiguration of Host Cell Gene Expression
Source: PubMed Central journal article supplement (PMC3694138; doi:10.1371/journal.pone.0066833), 2013-06-26

**Figure S1: QRT-PCR vs microarray for selected genes**

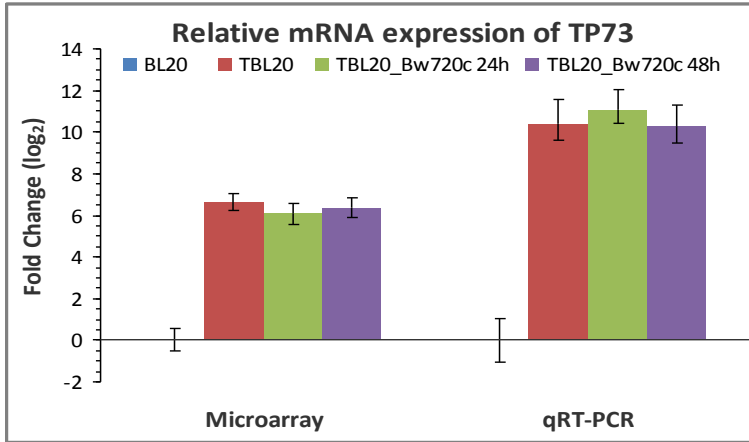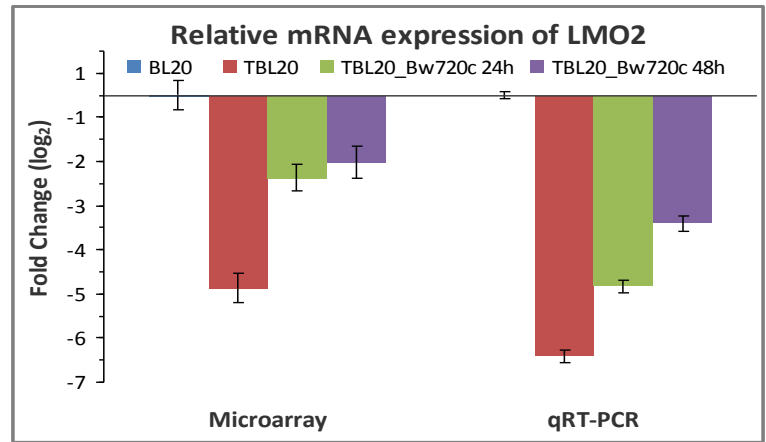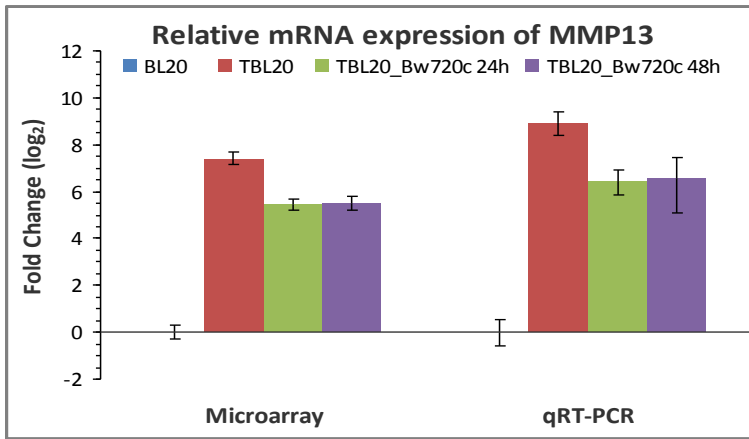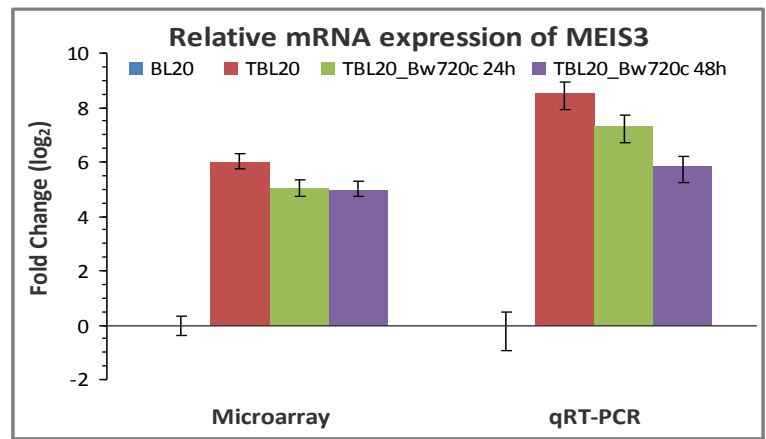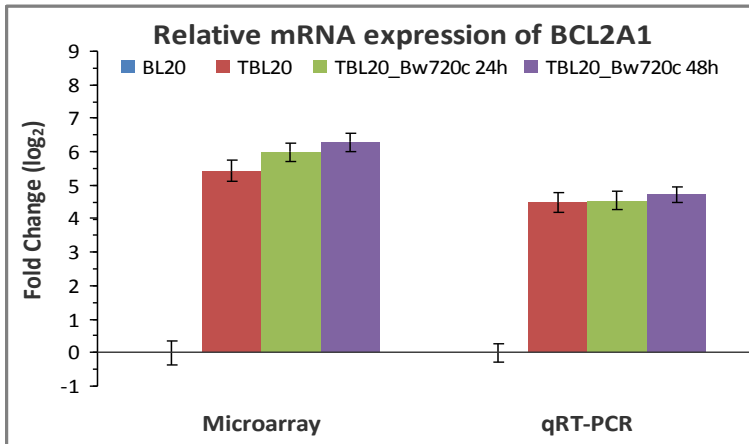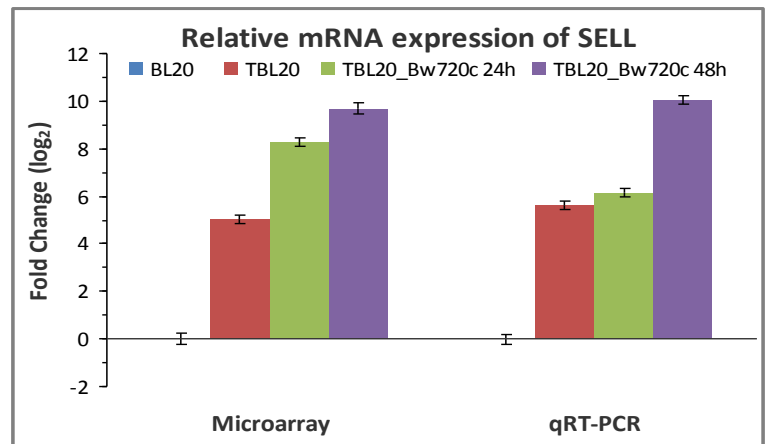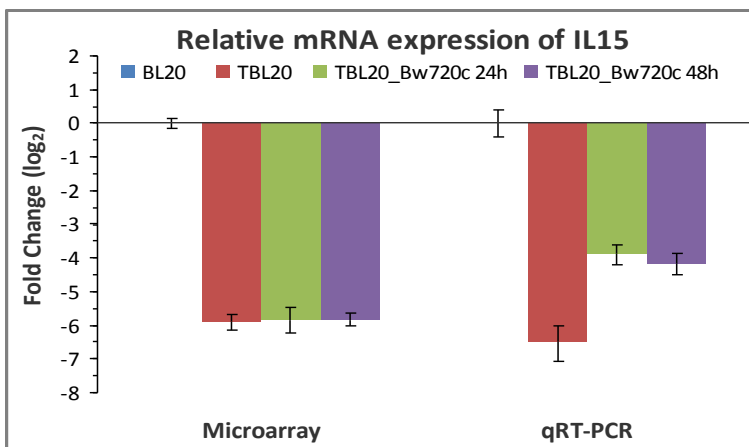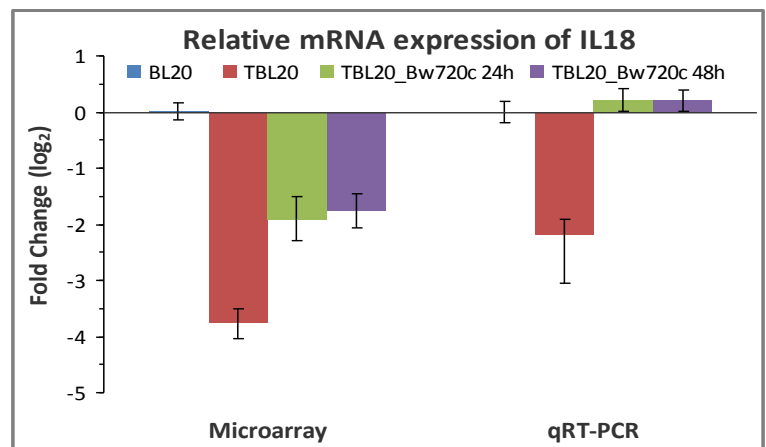

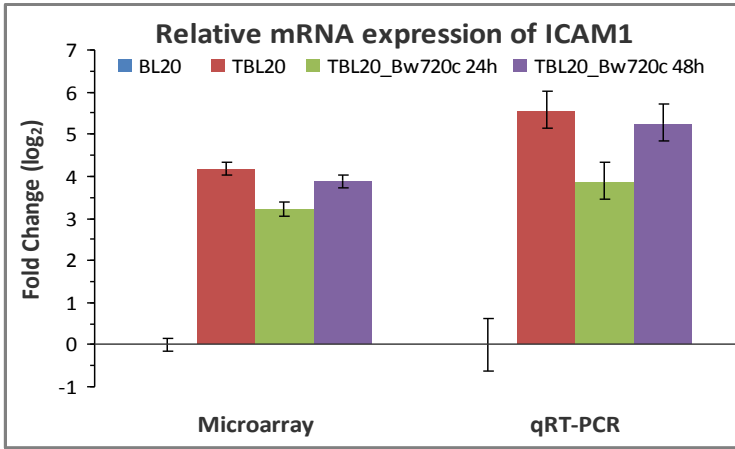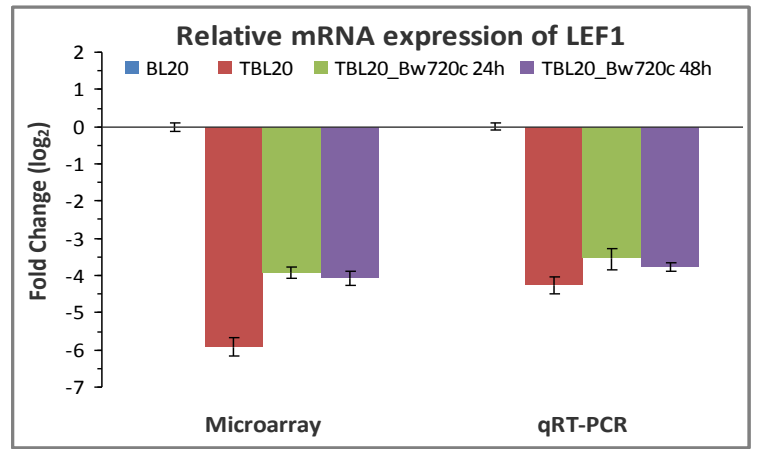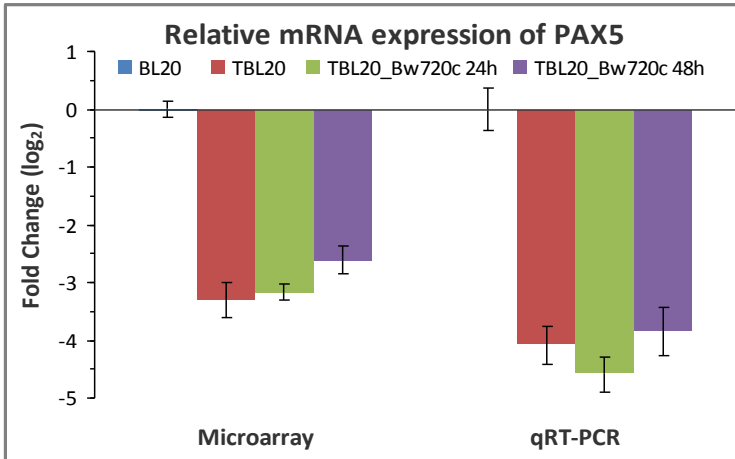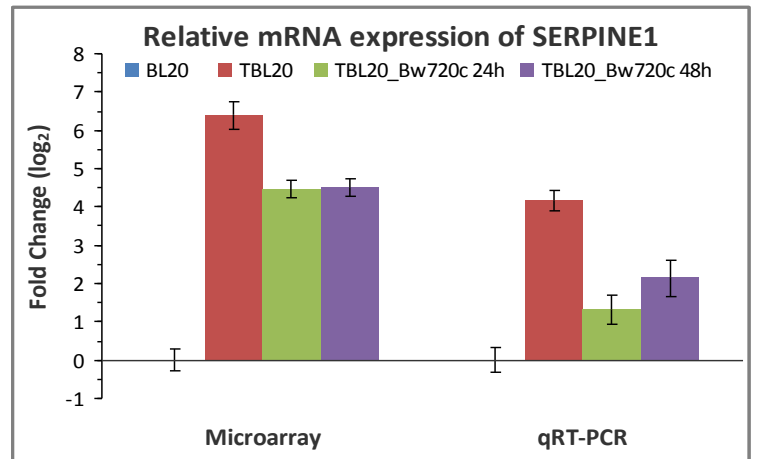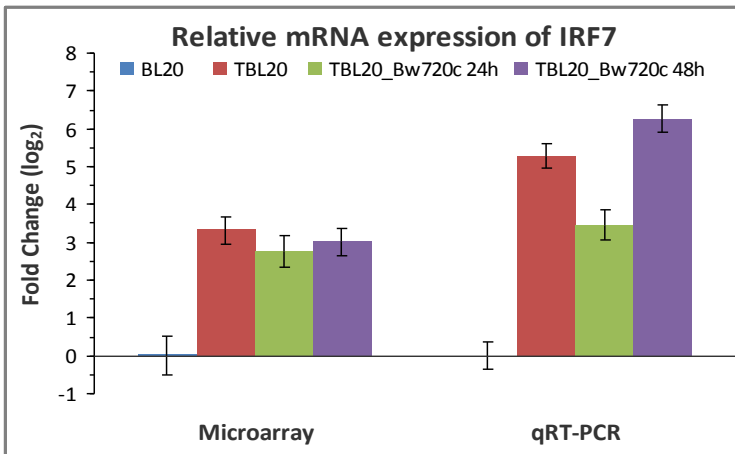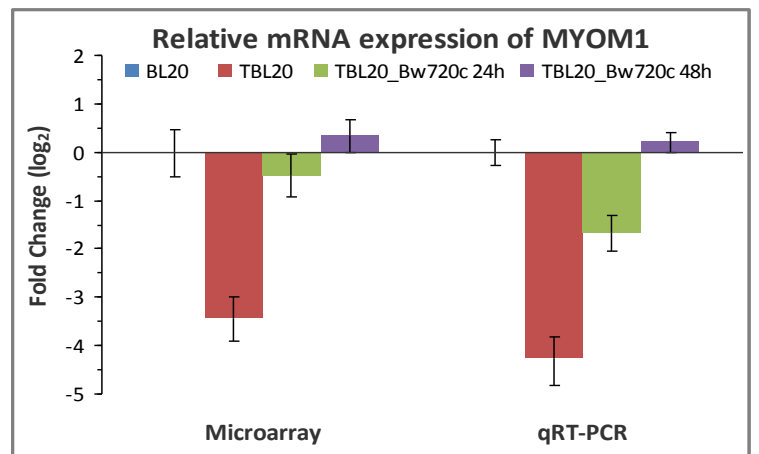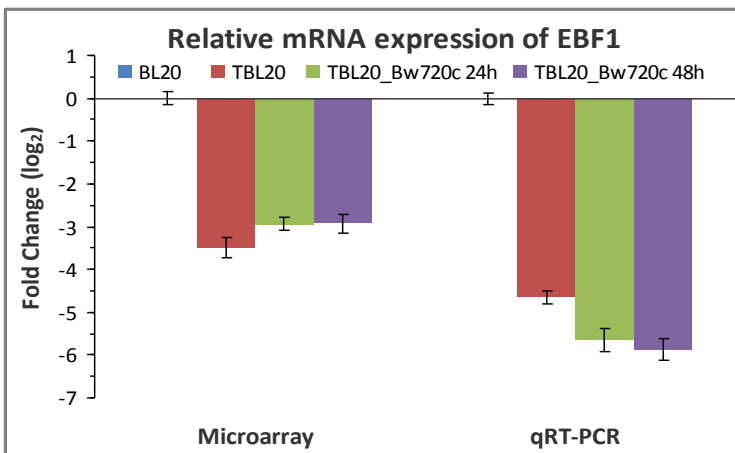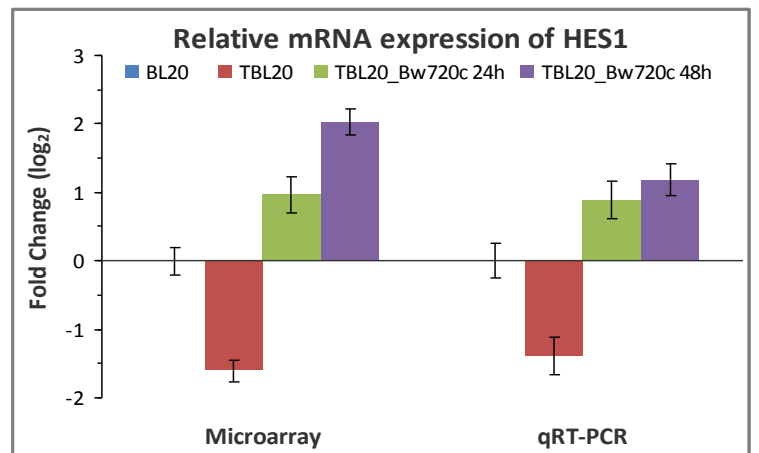

Supplement: pone.0066833.s001.pdf [file pone.0066833.s001.pdf]
