# Supplementary material for: A Bovine Lymphosarcoma Cell Line Infected with Theileria annulata Exhibits an Irreversible Reconfiguration of Host Cell Gene Expression
Source: PubMed Central journal article supplement (PMC3694138; doi:10.1371/journal.pone.0066833), 2013-06-26

**Figure S2: Semi-QRT-PCR for BW720c treated BL20 and TBL20**

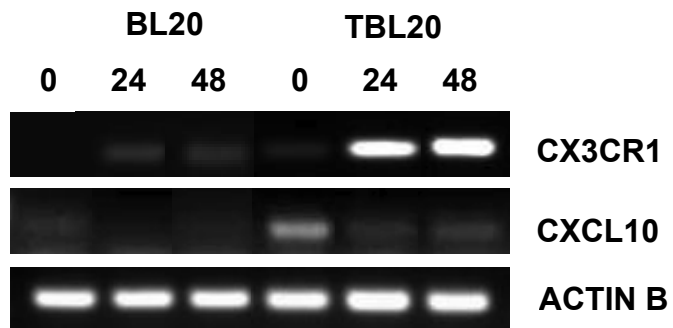

Supplement: pone.0066833.s002.pdf [file pone.0066833.s002.pdf]
