# Supplementary material for: A Bovine Lymphosarcoma Cell Line Infected with Theileria annulata Exhibits an Irreversible Reconfiguration of Host Cell Gene Expression
Source: PubMed Central journal article supplement (PMC3694138; doi:10.1371/journal.pone.0066833), 2013-06-26
Supplement: pone.0066833.s003.pdf [file pone.0066833.s003.pdf]

**Table S1: Primers pairs for RT-PCR**

| Symbol  | Entrez Gene Name                                                                | Entrez Gene ID | SEQ_ID       | RefSeq         | Primer Pair sequences                                                                                                    | Tm           | Length (bp) |
|---------|---------------------------------------------------------------------------------|----------------|--------------|----------------|--------------------------------------------------------------------------------------------------------------------------|--------------|-------------|
| ACTB    | actin, beta                                                                     | 280979         | gi_75832053  | NM_173979.3    | F <sup>871</sup> CTCTCTTCCAGCCTTCCTTCTGG <sup>894</sup><br>R <sup>1110</sup> ACACGGAGTACTTGCGCTCAGG <sup>1089</sup>      | 58.2<br>58.9 | 240         |
| MMP13   | matrix metalloproteinase 13 (collagenase 3)                                     | 281914         | gi_31342133  | NM_174389.2    | F <sup>516</sup> TGGTGACTTCTACCCATTTGATGG <sup>539</sup><br>R <sup>790</sup> ACTGAATCCCTTGGACATCATCATC <sup>766</sup>    | 54.6<br>54.7 | 275         |
| IL2RB   | interleukin 2 receptor, beta                                                    | 510185         | gi_119894051 | XM_587301.3    | F <sup>228</sup> ACTCACTCCAGGTCGTCCGCATAG <sup>251</sup><br>R <sup>444</sup> ACCTGAAGCTCATATTCGGTGCCTG <sup>420</sup>    | 59.8<br>58.9 | 217         |
| MEIS3   | Meis homeobox 3                                                                 | 617311         | gi_119910732 | XM_869544.2    | F <sup>203</sup> CGCTGCTAGCCCTGGTCTTTGAG <sup>225</sup><br>R <sup>434</sup> AGGTGGAAGCGGAGCACTTGAATG <sup>411</sup>      | 59.6<br>59.5 | 232         |
| CXCL10  | chemokine (C-X-C motif) ligand 10                                               | 615107         | gi_114052748 | NM_001046551.1 | F <sup>214</sup> TGCAAGTCAATCCTGCCACGTG <sup>236</sup><br>R <sup>416</sup> GAGGTAGCTTCTCTGTGCCATCC <sup>392</sup>        | 59.9<br>57.7 | 203         |
| CX3CR1  | chemokine (C-X3-C motif) receptor 1                                             | 100124525      | gi_156523227 | NM_001102558.1 | F <sup>27</sup> AGGAAGACTGACGGGCACATCG <sup>48</sup><br>R <sup>269</sup> TTGATGAGGGCAAACACCACCAGC <sup>246</sup>         | 58.7<br>59.9 | 243         |
| LMO2    | LIM domain only 2 (rhombotin-like 1)                                            | 614876         | gi_115496605 | NM_001076352.1 | F <sup>655</sup> CTACTACAAGCTGGGCCGGAAGC <sup>677</sup><br>R <sup>871</sup> CACGATGTCGGAGTTGATGAGGAGG <sup>847</sup>     | 59.3<br>59.0 | 217         |
| PGM5    | phosphoglucomutase 5                                                            | 785045         | gi_156121314 | NM_001102335.1 | F <sup>143</sup> TGCCCAACTTCATCCAGAGCGTGC <sup>166</sup><br>R <sup>437</sup> GCAACATTAACCTTCACTCCAACTCTCC <sup>409</sup> | 57.1<br>57.1 | 295         |
| TP73    | tumor protein p73                                                               | 515105         | gi_119927959 | XM_593064.3    | F <sup>2210</sup> AGGCTGGTCCCTCTGCTGGTC <sup>2230</sup><br>R <sup>2462</sup> AGGAACCTGTGTCCGTGCTCA <sup>2442</sup>       | 59.9<br>57.8 | 253         |
| NFKB2   | nuclear factor of kappa light polypeptide gene enhancer in B-cells 2 (p49/p100) | 526392         | gi_156120848 | NM_001102101.1 | F <sup>252</sup> CCAGAGTCATGGACAGTTGC <sup>271</sup><br>R <sup>688</sup> TTTGGTCACATGGAGGACAC <sup>669</sup>             | 60.4<br>59.6 | 437         |
| IGF2BP1 | insulin-like growth factor 2 mRNA binding protein 1                             | 516853         | gi_119912092 | XM_595012.3    | F <sup>1301</sup> TCGCCAGCGCCTCTATCAAGA <sup>1321</sup><br>R <sup>1571</sup> GGCACCACCACCTCAGCTGC <sup>1552</sup>        | 57.8<br>60.3 | 271         |
| SLC2A1  | solute carrier family 2 (facilitated glucose transporter), member 1             | 282356         | gi_31341556  | NM_174602.2    | F <sup>105</sup> CGGGATCCACAGAGCGCAGC <sup>124</sup><br>R <sup>213</sup> CCAGCATGAGGCGGCCTGTC <sup>194</sup>             | 60.2<br>60.1 | 109         |
| ENO3    | enolase 3 (beta, muscle)                                                        | 540303         | gi_77736348  | NM_001034702.1 | F <sup>29</sup> AGAGCCCAGCGAAGACATCCC <sup>49</sup><br>R <sup>392</sup> GCCAGGATGGCATTGGCCC <sup>373</sup>               | 58.3<br>60.4 | 364         |
| BCL2A1  | BCL2-related protein A1                                                         | 282151         | gi_115432056 | NM_001037100.2 | F <sup>304</sup> TGTGGCTTCTCTGTCCAGGAC <sup>325</sup><br>R <sup>666</sup> ACTTCCAGAAAAGTCAGCCAGCCA <sup>643</sup>        | 64<br>62.7   | 363         |
| MAP2K6  | mitogen-activated protein kinase kinase 6                                       | 286883         | gi_77404210  | NM_001034045.1 | F <sup>120</sup> GTCCATCTGCTGCCTCGGTCAAG <sup>142</sup><br>R <sup>517</sup> GATCCGCTTACCAGCCATGATC <sup>496</sup>        | 66.0<br>64.0 | 398         |
| IL18    | interleukin 18 (interferon-gamma-inducing factor)                               | 281249         | gi_31342868  | NM_174091.2    | F <sup>8</sup> TGCTCTCCAATGCTTTCAGCGC <sup>29</sup><br>R <sup>158</sup> TGCAGCCATCTTTATGCCTGTGC <sup>136</sup>           | 62.1<br>62.4 | 151         |
| IL15    | interleukin 15                                                                  | 281248         | gi_41386773  | NM_174090.1    | F <sup>79</sup> ACAGAGGCTGGCATTATGTCTTCA <sup>103</sup><br>R <sup>282</sup> CTCCAGGAGAAAGCACTGCATCG <sup>260</sup>       | 63.0<br>64.2 | 204         |

**Table S1: Primers pairs for RT-PCR (continued)**

|          |                                                                                               |           |              |                |                                                                                                                            |              |     |
|----------|-----------------------------------------------------------------------------------------------|-----------|--------------|----------------|----------------------------------------------------------------------------------------------------------------------------|--------------|-----|
| GPR81    | G protein-coupled receptor 81                                                                 | 538759    | gi_76638859  | XM_582510.2    | F <sup>742</sup> CCCTCCAGCGCCTGCAATCC <sup>761</sup><br>R <sup>938</sup> GTGGGCATCCCCTCTGGCCT <sup>919</sup>               | 65.5<br>65.5 | 197 |
| GAPDH    | glyceraldehyde-3-phosphate dehydrogenase                                                      | 281181    | gi_77404272  | NM_001034034.1 | F <sup>927</sup> CAGCGACACTCACTCTTCTACCTTC <sup>951</sup><br>R <sup>1120</sup> GAACTCTTCCTCTCGTGCTCCTG <sup>1098</sup>     | 57.0<br>56.7 | 194 |
| HES1     | hairy and enhancer of split 1, (Drosophila)                                                   | 539547    | gi_77736300  | NM_001034678.1 | F <sup>262</sup> GTGGCTGCTACTCCAGCCAGTG <sup>283</sup><br>R <sup>529</sup> CTGTGCTTAGCGCGGCCGTCA <sup>509</sup>            | 59.5<br>62.3 | 268 |
| SELL     | selectin L                                                                                    | 281485    | gi_27901800  | NM_174182.1    | F <sup>620</sup> ATGCAGCGGCCATGGACAATGTG <sup>642</sup><br>R <sup>830</sup> AATCATGTCTGTTCCCTTGAGCAG <sup>806</sup>        | 60.6<br>57.0 | 211 |
| LEF1     | lymphoid enhancer-binding factor 1                                                            | 535399    | gi_119893570 | XM_615475.3    | F <sup>890</sup> GTCTCCGGGTGGTGTGGACAG <sup>911</sup><br>R <sup>992</sup> CAGTGAGGATGGGTAGGGCTGC <sup>971</sup>            | 59.1<br>58.7 | 103 |
| PAX5     | paired box 5                                                                                  | 538371    | gi_119900560 | XM_618574.3    | F <sup>1053</sup> TGTCCGAACGGCCACTCAC <sup>1072</sup><br>R <sup>1438</sup> CCATCCCTGTCAGCGTCGGC <sup>1419</sup>            | 59.9<br>59.8 | 386 |
| EBF1     | early B-cell factor 1                                                                         | 537712    | gi_119895769 | XM_617891.3    | F <sup>1277</sup> ACACCTCGGTCCATGCGGGA <sup>1296</sup><br>R <sup>1566</sup> GGGGCTAGATGGCACGATGGC <sup>1546</sup>          | 59.9<br>59.7 | 290 |
| SERPINE1 | serpin peptidase inhibitor, clade E (nexin, plasminogen activator inhibitor type 1), member 1 | 281375    | gi_31342766  | NM_174137.2    | F <sup>128</sup> ATGTCTCCGGTCTTTGCCTGCCTC <sup>151</sup><br>R <sup>473</sup> CGGCTGTGCTGATCTCATCCTTGTTCC <sup>448</sup>    | 60.8<br>59.9 | 346 |
| MYOM1    | myomesin 1, 185kDa                                                                            | 538404    | gi_119916232 | XM_618609.3    | F <sup>4077</sup> CTACGTGGATGATCTGAAAGTTAACTGG <sup>4104</sup><br>R <sup>4262</sup> TCCACCATCTTCTGGTGTCCGG <sup>4241</sup> | 55.8<br>57.9 | 186 |
| ICAM1    | intercellular adhesion molecule 1                                                             | 281839    | gi_31342240  | NM_174348.2    | F <sup>594</sup> TGGCCCTGCTCGGGACTCTG <sup>613</sup><br>R <sup>784</sup> AACCTTCCAGTTGTCCCCACGG <sup>763</sup>             | 60.3<br>58.7 | 191 |
| IRF7     | interferon regulatory factor 7                                                                | 100125591 | gi_157279988 | NM_001105040.1 | F <sup>970</sup> CCAGGGACCTCTTGATCCAGGC <sup>991</sup><br>R <sup>1234</sup> CGGCCCTTATACAGGATGCTCAAG <sup>1211</sup>       | 58.4<br>57.2 | 265 |
| JUND     | jun D proto-oncogene                                                                          | 517192    | gi_157168340 | NM_001103253.1 | F <sup>1205</sup> AGGGCGCCTCAGACTCGACA <sup>1224</sup><br>R <sup>1329</sup> GCGGGTTTGTGCAACACGGG <sup>1310</sup>           | 59.6<br>59.6 | 125 |
| MYBL2    | v-myb myeloblastosis viral oncogene homolog (avian)-like 2                                    | 510420    | gi_115495776 | NM_001075448.1 | F <sup>422</sup> CCAGCCACTTTCCCAACCGCA <sup>442</sup><br>R <sup>572</sup> AGCGTCCACTGCTTCGTGCC <sup>553</sup>              | 59.8<br>59.9 | 151 |
| RAG2     | recombination activating gene 2                                                               | 782387    | gi_126723156 | NM_001082469.1 | F <sup>379</sup> GGCCACTTGACATTCAGCGG <sup>399</sup><br>R <sup>695</sup> GGGGCAGGCAGTCAGCTACAC <sup>675</sup>              | 59.2<br>59.5 | 317 |
