# Supplementary material for: A Bovine Lymphosarcoma Cell Line Infected with Theileria annulata Exhibits an Irreversible Reconfiguration of Host Cell Gene Expression
Source: PubMed Central journal article supplement (PMC3694138; doi:10.1371/journal.pone.0066833), 2013-06-26
Supplement: pone.0066833.s004.pdf [file pone.0066833.s004.pdf]

**Table S2: Validation of microarray expression from literature**

| Symbol             | Annotation                                       | Array FC |   | BW720c | Previous Report            |
|--------------------|--------------------------------------------------|----------|---|--------|----------------------------|
| MMP9               | Matrix Metalloproteinase 9                       | 192.4    | ▲ | -      | ▲ Baylis et al (1995)      |
| GMCSF/CSF2         | Granulocyte-macrophage colony stimulating factor | 3.5      | ▲ | ▼      | ▲ Baumgartner et al (2000) |
| IL2RA              | Interleukin 2 receptor, alpha                    | 25.9     | ▲ | ▲      | ▲ Dobbelaere et al (1990)  |
| ILR2B              | Interleukin 2 receptor, beta                     | 80.3     | ▲ | -      | ▲ Dobbelaere et al (1990)  |
| ICAM1              | Intercellular adhesion molecule 1                | 18.0     | ▲ | ▼      | ▲ Jensen et al (2008)      |
| ITGA4              | Integrin, alpha 4 (antigen CD49D)                | 5.3      | ▲ | -      | ▲ Lüder et al (2009)       |
| FYN, LYC, LYN, HCK | Src family kinase                                | 2.5      | ▲ | -      | ▲ Baumgartner et al (2003) |
