# Supplementary material for: A Bovine Lymphosarcoma Cell Line Infected with Theileria annulata Exhibits an Irreversible Reconfiguration of Host Cell Gene Expression
Source: PubMed Central journal article supplement (PMC3694138; doi:10.1371/journal.pone.0066833), 2013-06-26
Supplement: pone.0066833.s005.pdf [file pone.0066833.s005.pdf]

**Table S3A: Top ranking genes in TBL20 vs BL20 (Up in TBL)**

| SEQ_ID                           | Entrez gene ID | Symbol           | Entrez Gene Name                                             | Location            | Type                       | Predicted BL20 expression level | FC        |             |            |            | FDR        |            |            |                |
|----------------------------------|----------------|------------------|--------------------------------------------------------------|---------------------|----------------------------|---------------------------------|-----------|-------------|------------|------------|------------|------------|------------|----------------|
|                                  |                |                  |                                                              |                     |                            |                                 | FC BLVtBL | FDR BLVsTBL | TBLvTBL24h | TBLvTBL24h | TBLvTBL48h | TBLvTBL48h | FDR BLVtBL | FDR TBLvTBL24h |
| gi_31342239_ref_NM_175716.2_     | 319096         | XCL2             | chemokine (C motif) ligand 2                                 | Extracellular Space | cytokine                   | L                               | 741.977   | 0.000       | -18.786    | 0.000      | -12.467    | 0.000      |            |                |
| gi_31342133_ref_NM_174389.2_     | 281914         | MMP13            | matrix metalloproteinase 13 (collagenase 3)                  | Extracellular Space | peptidase                  | N                               | 172.114   | 0.000       | -3.980     | 0.000      | -3.846     | 0.000      |            |                |
| gi_31342766_ref_NM_174137.2_     | 281375         | SERPINE1         | serpin peptidase inhibitor, clade E (nexin, plasminogen      | Extracellular Space | other                      | L                               | 83.904    | 0.000       | -3.800     | 0.000      | -3.681     | 0.000      |            |                |
| gi_124249267_ref_NM_001080904.1_ | 509513         |                  |                                                              |                     |                            | L                               | 67.927    | 0.000       | -2.162     | 0.000      | -4.605     | 0.000      |            |                |
| gi_119895008_ref_XM_594772.3_    | 516616         |                  |                                                              |                     |                            | L                               | 62.708    | 0.000       | -2.378     | 0.000      | -8.959     | 0.000      |            |                |
| gi_76655242_ref_XM_582736.2_     | 538791         | KCNK18           | potassium channel, subfamily K, member 18                    | Plasma Membrane     | ion channel                | N                               | 59.961    | 0.000       | -2.067     | 0.000      | -3.715     | 0.000      |            |                |
| gi_31341539_ref_NM_174610.2_     | 282366         | SLC6A6           | solute carrier family 6 (neurotransmitter transporter, tau   | Plasma Membrane     | transporter                | M                               | 45.455    | 0.000       | -2.500     | 0.000      | -2.570     | 0.000      |            |                |
| gi_119919278_ref_XM_609882.3_    | 531389         | FOSL1            | FOS-like antigen 1                                           | Nucleus             | transcription regulator    | L                               | 37.291    | 0.000       | -3.872     | 0.000      | -5.028     | 0.000      |            |                |
| gi_114051104_ref_NM_001046018.1_ | 508916         | CES1 (includes E | carboxylesterase 1 (monocyte/macrophage serine este          | Cytoplasm           | enzyme                     | N                               | 33.640    | 0.000       | 4.991      | 0.000      | 6.642      | 0.000      |            |                |
| gi_115495618_ref_NM_001075554.1_ | 512098         | CES1 (includes E | carboxylesterase 1 (monocyte/macrophage serine este          | Cytoplasm           | enzyme                     | L                               | 32.868    | 0.000       | 4.526      | 0.000      | 5.086      | 0.000      |            |                |
| gi_27901800_ref_NM_174182.1_     | 281485         | SELL             | selectin L                                                   | Plasma Membrane     | other                      | L                               | 32.529    | 0.000       | 9.430      | 0.000      | 25.516     | 0.000      |            |                |
| gi_119917127_ref_XM_870373.2_    | 618042         | VGF              | VEGF nerve growth factor inducible                           | Extracellular Space | growth factor              | M                               | 31.809    | 0.000       | -12.728    | 0.000      | -6.743     | 0.000      |            |                |
| gi_119911540_ref_XM_001253061.1_ | 786204         | CCL1             | chemokine (C-C motif) ligand 1                               | Extracellular Space | cytokine                   | M                               | 30.930    | 0.000       | -15.202    | 0.000      | -15.172    | 0.000      |            |                |
| gi_77736504_ref_NM_001034779.1_  | 615215         | MAPKAP3          | mitogen-activated protein kinase-activated protein kina      | Nucleus             | kinase                     | M                               | 30.830    | 0.000       | -2.712     | 0.000      | -3.102     | 0.000      |            |                |
| gi_115497085_ref_NM_001075287.1_ | 506939         | CTTN             | catenin                                                      | Plasma Membrane     | other                      | M                               | 26.944    | 0.000       | -2.238     | 0.000      | -2.406     | 0.000      |            |                |
| gi_119931896_ref_XM_001256737.1_ | 790198         |                  |                                                              |                     |                            | N                               | 26.458    | 0.000       | -3.116     | 0.000      | -6.551     | 0.000      |            |                |
| gi_119893697_ref_XM_613831.3_    | 534164         | SLIT2            | slit homolog 2 (Drosophila)                                  | Extracellular Space | other                      | L                               | 15.190    | 0.000       | -2.336     | 0.000      | -6.673     | 0.000      |            |                |
| gi_149642934_ref_NM_001099064.1_ | 534625         | CUEDC1           | CUE domain containing 1                                      | unknown             | other                      | L                               | 13.006    | 0.000       | -2.391     | 0.000      | -2.237     | 0.000      |            |                |
| gi_115497701_ref_NM_001075592.1_ | 512999         | MANSC1           | MANSC domain containing 1                                    | unknown             | other                      | L                               | 12.016    | 0.000       | -2.025     | 0.000      | -3.422     | 0.000      |            |                |
| gi_119903194_ref_XM_001255518.1_ | 493716         |                  |                                                              |                     |                            | M                               | 11.818    | 0.000       | -1.971     | 0.000      | -3.038     | 0.000      |            |                |
| gi_119908296_ref_XM_868619.2_    | 616569         |                  |                                                              |                     |                            | N                               | 9.925     | 0.000       | -6.584     | 0.000      | -5.966     | 0.000      |            |                |
| gi_28461172_ref_NM_175772.1_     | 280781         | ELN              | elastin                                                      | Extracellular Space | other                      | M                               | 9.008     | 0.000       | -3.254     | 0.000      | -11.986    | 0.000      |            |                |
| gi_156523227_ref_NM_001102558.1_ | 100124525      | CX3CR1           | chemokine (C-X3-C motif) receptor 1                          | Plasma Membrane     | G-protein coupled receptor | N                               | 8.178     | 0.000       | 55.305     | 0.000      | 137.187    | 0.000      |            |                |
| gi_114052748_ref_NM_001046551.1_ | 615107         | CXCL10           | chemokine (C-X-C motif) ligand 10                            | Extracellular Space | cytokine                   | L                               | 7.821     | 0.000       | -7.216     | 0.000      | -8.178     | 0.000      |            |                |
| gi_119887104_ref_XM_587930.3_    | 510745         | ABCG1            | ATP-binding cassette, sub-family G (WHITE), member           | Plasma Membrane     | transporter                | M                               | 7.545     | 0.000       | -6.325     | 0.000      | -4.659     | 0.000      |            |                |
| gi_31341556_ref_NM_174602.2_     | 282356         | SLC2A1           | solute carrier family 2 (facilitated glucose transporter), i | Plasma Membrane     | transporter                | H                               | 7.347     | 0.000       | -2.188     | 0.000      | -2.633     | 0.000      |            |                |
| gi_119908655_ref_XM_585954.3_    | 509065         |                  |                                                              |                     |                            | N                               | 6.971     | 0.000       | -2.026     | 0.000      | -2.245     | 0.000      |            |                |
| gi_115497115_ref_NM_001076483.1_ | 617915         | ANGPT4           | angiopoietin 4                                               | Extracellular Space | growth factor              | H                               | 6.317     | 0.000       | -1.951     | 0.000      | -2.488     | 0.000      |            |                |
| gi_149944706_ref_NM_001099010.1_ | 519269         | RRAS2            | related RAS viral (r-ras) oncogene homolog 2                 | Plasma Membrane     | enzyme                     | N                               | 6.198     | 0.000       | 3.471      | 0.000      | 6.574      | 0.000      |            |                |
| gi_119891585_ref_XM_581625.2_    | 505349         |                  |                                                              |                     |                            | M                               | 6.186     | 0.000       | -4.110     | 0.000      | -7.311     | 0.000      |            |                |
| gi_89886438_ref_NM_001039726.1_  | 281422         | PRLR             | prolactin receptor                                           | Plasma Membrane     | transmembrane receptor     | N                               | 6.067     | 0.000       | -2.220     | 0.000      | -4.282     | 0.000      |            |                |
| gi_114052065_ref_NM_001045941.1_ | 506415         | RSAD2            | radical S-adenosyl methionine domain containing 2            | unknown             | enzyme                     | L                               | 5.993     | 0.000       | 10.435     | 0.000      | 23.103     | 0.000      |            |                |
| gi_115495012_ref_NM_001075819.1_ | 521378         | CITED2           | Cbp/p300-interacting transactivator, with Glu/Asp-rich c     | Nucleus             | transcription regulator    | H                               | 5.909     | 0.000       | -2.431     | 0.000      | -2.881     | 0.000      |            |                |
| gi_31340804_ref_NM_174733.2_     | 282851         | DHRS9            | dehydrogenase/reductase (SDR family) member 9                | Cytoplasm           | enzyme                     | L                               | 5.841     | 0.000       | 5.947      | 0.000      | 7.464      | 0.000      |            |                |
| gi_148234191_ref_NM_001098036.1_ | 515437         | SLC39A14         | solute carrier family 39 (zinc transporter), member 14       | Plasma Membrane     | transporter                | H                               | 5.231     | 0.000       | -2.133     | 0.000      | -2.895     | 0.000      |            |                |
| gi_119901455_ref_XM_614574.3_    | 541106         | RRAGD            | Ras-related GTP binding D                                    | Cytoplasm           | enzyme                     | L                               | 5.197     | 0.000       | 5.305      | 0.000      | 6.589      | 0.000      |            |                |
| gi_119908653_ref_XM_583371.3_    | 538868         | RGS1             | regulator of G-protein signaling like 1                      | unknown             | other                      | N                               | 4.792     | 0.000       | -4.166     | 0.000      | -4.469     | 0.000      |            |                |
| gi_119907150_ref_XM_612483.3_    | 533166         | SORL1            | sortilin-related receptor, L(DLR class) A repeats-contair    | Plasma Membrane     | transporter                | L                               | 4.761     | 0.000       | 5.674      | 0.000      | 8.918      | 0.000      |            |                |
| gi_119912220_ref_XM_869703.2_    | 535629         | SNIP             | SNAP25-interacting protein                                   | Cytoplasm           | other                      | M                               | 4.552     | 0.000       | -4.863     | 0.000      | -5.383     | 0.000      |            |                |
| gi_119888721_ref_XM_612644.3_    | 540687         | GPR3             | G protein-coupled receptor 3                                 | Plasma Membrane     | G-protein coupled receptor | L                               | 4.415     | 0.000       | -3.230     | 0.000      | -5.521     | 0.000      |            |                |

**Table S3B: Top ranking genes in TBL20 vs BL20 (Down in TBL)**

| SEQ_ID                           | Entrez gene ID | Symbol   | Entrez Gene Name                                          | Location            | Type                       | Predicted BL20 expression level | FC        |             |            |            | FDR        |            |            |                |
|----------------------------------|----------------|----------|-----------------------------------------------------------|---------------------|----------------------------|---------------------------------|-----------|-------------|------------|------------|------------|------------|------------|----------------|
|                                  |                |          |                                                           |                     |                            |                                 | FC BLVtBL | FDR BLVsTBL | TBLvTBL24h | TBLvTBL24h | TBLvTBL48h | TBLvTBL48h | FDR BLVtBL | FDR TBLvTBL24h |
| gi_119917736_ref_XM_609898.3_    | 531405         | SORCS3   | sortilin-related VPS10 domain containing receptor 3       | Nucleus             | transporter                | VH                              | -530.654  | 0.000       | 1.102      | 1.075      | 1.427      | 0.968      |            |                |
| gi_119930329_ref_XM_001253356.1_ | 785289         |          |                                                           |                     |                            | VH                              | -388.537  | 0.000       | 1.872      | 0.072      | 3.895      | 0.000      |            |                |
| gi_119908049_ref_XM_611589.3_    | 515828         |          |                                                           |                     |                            | VH                              | -317.451  | 0.000       | 1.037      | 0.714      | 1.101      | 0.743      |            |                |
| gi_119925613_ref_XM_583887.3_    | 507299         |          |                                                           |                     |                            | VH                              | -301.600  | 0.000       | 1.103      | 1.097      | 1.007      | 0.960      |            |                |
| gi_119915839_ref_XM_588122.3_    | 617881         | F13A1    | coagulation factor XIII, A1 polypeptide                   | Extracellular Space | enzyme                     | VH                              | -289.916  | 0.000       | -1.225     | 0.365      | -1.193     | 0.452      |            |                |
| gi_118151215_ref_NM_001078068.1_ | 617148         | PPP1R14C | protein phosphatase 1, regulatory (inhibitor) subunit 14  | Cytoplasm           | other                      | VH                              | -275.447  | 0.000       | 1.366      | 0.943      | 1.490      | 0.786      |            |                |
| gi_119902260_ref_XM_603355.3_    | 404176         |          |                                                           |                     |                            | VH                              | -238.931  | 0.000       | 2.254      | 0.017      | 3.088      | 0.005      |            |                |
| gi_31341436_ref_NM_174652.2_     | 282470         | SLC11A1  | solute carrier family 11 (proton-coupled divalent metal i | Plasma Membrane     | transporter                | VH                              | -238.083  | 0.000       | 2.273      | 0.015      | 8.234      | 0.000      |            |                |
| gi_119911249_ref_XM_867060.2_    | 615295         | LAIR1    | leukocyte-associated immunoglobulin-like receptor 1       | Plasma Membrane     | transmembrane receptor     | VH                              | -230.065  | 0.000       | 1.227      | 1.175      | 1.082      | 1.141      |            |                |
| gi_134085858_ref_NM_001083409.1_ | 511774         | C1QTNF1  | C1q and tumor necrosis factor related protein 1           | Extracellular Space | other                      | VH                              | -207.726  | 0.000       | 1.511      | 0.504      | 3.418      | 0.002      |            |                |
| gi_119887727_ref_XM_598566.3_    | 520327         | KYNU     | kynureninase (L-kynurenine hydrolase)                     | Cytoplasm           | enzyme                     | H                               | -197.621  | 0.000       | 1.311      | 1.174      | 2.482      | 0.024      |            |                |
| gi_119891326_ref_XM_590508.3_    | 512903         | CPA4     | carboxypeptidase A4                                       | Extracellular Space | peptidase                  | VH                              | -195.388  | 0.000       | 3.829      | 0.000      | 6.574      | 0.000      |            |                |
| gi_119919107_ref_XM_591760.3_    | 513984         | SLC15A3  | solute carrier family 15, member 3                        | unknown             | transporter                | VH                              | -188.144  | 0.000       | 5.286      | 0.000      | 12.409     | 0.000      |            |                |
| gi_31343049_ref_NM_174010.2_     | 281052         | CD36     | CD36 molecule (thrombospondin receptor)                   | Plasma Membrane     | transmembrane receptor     | VH                              | -185.369  | 0.000       | 2.016      | 0.051      | 2.040      | 0.123      |            |                |
| gi_119910462_ref_XM_592455.3_    | 514582         |          |                                                           |                     |                            | VH                              | -169.428  | 0.000       | 2.149      | 0.027      | 4.403      | 0.000      |            |                |
| gi_119920009_ref_XM_601830.3_    | 523530         | NXF3     | nuclear RNA export factor 3                               | Nucleus             | transporter                | VH                              | -166.634  | 0.000       | 1.449      | 0.683      | 1.393      | 0.942      |            |                |
| gi_153792426_ref_NM_001099726.1_ | 782045         | CYSLTR1  | cysteinyl leukotriene receptor 1                          | Plasma Membrane     | G-protein coupled receptor | VH                              | -162.124  | 0.000       | 1.562      | 0.439      | 12.481     | 0.000      |            |                |
| gi_119916419_ref_XM_587341.3_    | 510218         | ALPK2    | alpha-kinase 2                                            | unknown             | kinase                     | VH                              | -154.916  | 0.000       | -1.167     | 0.376      | -1.238     | 0.252      |            |                |
| gi_119918049_ref_XM_001256292.1_ | 789579         |          |                                                           |                     |                            | VH                              | -149.900  | 0.000       | 2.161      | 0.029      | 6.379      | 0.000      |            |                |
| gi_119906950_ref_XM_001251159.1_ | 783497         | PPP1R14C | protein phosphatase 1, regulatory (inhibitor) subunit 14  | Cytoplasm           | other                      | VH                              | -132.800  | 0.000       | 1.047      | 1.015      | 1.341      | 1.047      |            |                |

| SEQ_ID                           | Entrez gene ID | Symbol  | Entrez Gene Name                                      | Location            | Type                       | Predicted BL20 expression level | FC BLvTBL | FDR BLvsTBL | FC         |            | FDR        |            |
|----------------------------------|----------------|---------|-------------------------------------------------------|---------------------|----------------------------|---------------------------------|-----------|-------------|------------|------------|------------|------------|
|                                  |                |         |                                                       |                     |                            |                                 |           |             | TBLvTBL24h | TBLvTBL24h | TBLvTBL48h | TBLvTBL48h |
| gi_119920237_ref_XM_001253574.1_ | 785599         | ZCCHC13 | zinc finger, CCHC domain containing 13                | unknown             | other                      | H                               | -118.534  | 0.000       | 2.387      | 0.010      | 15.366     | 0.000      |
| gi_119934529_ref_XM_001255814.1_ | 788901         |         |                                                       |                     |                            | VH                              | -112.738  | 0.000       | 1.909      | 0.094      | 4.136      | 0.000      |
| gi_119920839_ref_XM_001250568.1_ | 782007         | ZCCHC13 | zinc finger, CCHC domain containing 13                | unknown             | other                      | H                               | -112.219  | 0.000       | 2.187      | 0.026      | 14.107     | 0.000      |
| gi_76660614_ref_XM_597941.2_     | 519716         | CCR6    | chemokine (C-C motif) receptor 6                      | Plasma Membrane     | G-protein coupled receptor | H                               | -110.621  | 0.000       | 1.437      | 0.755      | 2.660      | 0.014      |
| gi_115495094_ref_NM_001075968.1_ | 532587         | BLK     | B lymphoid tyrosine kinase                            | Cytoplasm           | kinase                     | VH                              | -110.233  | 0.000       | 3.063      | 0.000      | 4.537      | 0.000      |
| gi_157954060_ref_NM_001109795.1_ | 513856         | A2M     | alpha-2-macroglobulin                                 | Extracellular Space | transporter                | VH                              | -109.925  | 0.000       | 2.001      | 0.059      | 4.697      | 0.000      |
| gi_118151371_ref_NM_001078149.1_ | 777644         | GSTA3   | glutathione S-transferase alpha 3                     | Cytoplasm           | enzyme                     | H                               | -108.114  | 0.000       | -1.036     | 0.534      | -1.189     | 0.349      |
| gi_119913552_ref_XM_606794.3_    | 281848         | IGF1R   | insulin-like growth factor 1 receptor                 | Plasma Membrane     | transmembrane receptor     | VH                              | -107.774  | 0.000       | 1.943      | 0.061      | 1.866      | 0.190      |
| gi_119923075_ref_XM_001254039.1_ | 786327         |         |                                                       |                     |                            | VH                              | -100.332  | 0.000       | 3.046      | 0.000      | 9.232      | 0.000      |
| gi_156120512_ref_NM_001101932.1_ | 510702         |         |                                                       |                     |                            | VH                              | -99.953   | 0.000       | -1.072     | 0.723      | -1.180     | 0.420      |
| gi_149642838_ref_NM_001099200.1_ | 786888         | PNPLA1  | patatin-like phospholipase domain containing 1        | unknown             | enzyme                     | VH                              | -99.595   | 0.000       | 1.718      | 0.243      | 1.765      | 0.340      |
| gi_157427947_ref_NM_001105411.1_ | 534801         | GFRA1   | GDNF family receptor alpha 1                          | Plasma Membrane     | transmembrane receptor     | VH                              | -99.175   | 0.000       | 1.884      | 0.106      | 4.459      | 0.000      |
| gi_134085612_ref_NM_001083388.1_ | 508076         | COL18A1 | collagen, type XVIII, alpha 1                         | Extracellular Space | other                      | VH                              | -98.389   | 0.000       | 1.260      | 1.255      | 1.266      | 1.312      |
| gi_126723156_ref_NM_001082469.1_ | 782387         | RAG2    | recombination activating gene 2                       | Nucleus             | enzyme                     | H                               | -97.720   | 0.000       | 1.884      | 0.117      | 1.188      | 1.332      |
| gi_119918193_ref_XM_598235.3_    | 520004         | UNC5D   | unc-5 homolog D (C. elegans)                          | unknown             | other                      | H                               | -86.221   | 0.000       | 1.083      | 1.131      | 1.357      | 1.151      |
| gi_157279834_ref_NM_001104962.1_ | 353108         |         |                                                       |                     |                            | VH                              | -85.808   | 0.000       | 7.308      | 0.000      | 7.674      | 0.000      |
| gi_32189337_ref_NM_174143.1_     | 281401         | PIGR    | polymeric immunoglobulin receptor                     | Plasma Membrane     | transporter                | H                               | -85.226   | 0.000       | 2.400      | 0.010      | 3.736      | 0.001      |
| gi_99028960_ref_NM_174184.3_     | 281489         | SLAMF1  | signaling lymphocytic activation molecule family memb | Plasma Membrane     | transmembrane receptor     | VH                              | -84.352   | 0.000       | 1.301      | 1.106      | 1.326      | 1.182      |
