# Supplementary material for: A Bovine Lymphosarcoma Cell Line Infected with Theileria annulata Exhibits an Irreversible Reconfiguration of Host Cell Gene Expression
Source: PubMed Central journal article supplement (PMC3694138; doi:10.1371/journal.pone.0066833), 2013-06-26
Supplement: pone.0066833.s006.pdf [file pone.0066833.s006.pdf]

**Table S4A: No evidence of expression in BL20; up-regulated in TBL20**

| SEQ_ID                           | Entrez gene ID | Symbol        | Entrez Gene Name                                              | Location            | Type                       | Predicted BL20 expression level | FC        |            | FDR           |                |               |                |
|----------------------------------|----------------|---------------|---------------------------------------------------------------|---------------------|----------------------------|---------------------------------|-----------|------------|---------------|----------------|---------------|----------------|
|                                  |                |               |                                                               |                     |                            |                                 | FC BLVtBL | FDR BLVtBL | FC TBLvTBL24h | FDR TBLvTBL24h | FC TBLvTBL48h | FDR TBLvTBL48h |
| gi_119903692_ref_XM_871827.2_    | 521137         | LRRTM4        | leucine rich repeat transmembrane neuronal 4                  | unknown             | other                      | N                               | 314.277   | 0.000      | 2.084         | 0.041          | 1.519         | 0.778          |
| gi_158519830_ref_NM_001110080.1_ | 532603         | KIAA1598      | KIAA1598                                                      | unknown             | other                      | N                               | 234.222   | 0.000      | -1.917        | 0.000          | -5.081        | 0.000          |
| gi_76608886_ref_XM_868724.1_     | 616646         | CLEC4D        | C-type lectin domain family 4, member D                       | unknown             | other                      | N                               | 114.747   | 0.000      | 2.872         | 0.001          | 2.600         | 0.016          |
| gi_76655242_ref_XM_582736.2_     | 538791         | KCNK18        | potassium channel, subfamily K, member 18                     | Plasma Membrane     | ion channel                | N                               | 59.961    | 0.000      | -2.067        | 0.000          | -3.715        | 0.000          |
| gi_119918977_ref_XM_600048.3_    | 521780         | VWA5A         | von Willebrand factor A domain containing 5A                  | unknown             | other                      | N                               | 58.984    | 0.000      | 1.731         | 0.236          | 1.417         | 1.014          |
| gi_30794303_ref_NM_181004.1_     | 281050         | CD28          | CD28 molecule                                                 | Plasma Membrane     | other                      | N                               | 52.163    | 0.000      | 1.563         | 0.526          | 2.284         | 0.051          |
| gi_119923735_ref_XM_586767.3_    | 539380         | MUM1L1        | melanoma associated antigen (mutated) 1-like 1                | unknown             | other                      | N                               | 47.604    | 0.000      | 1.930         | 0.091          | 1.832         | 0.276          |
| gi_115432056_ref_NM_001037100.2_ | 282151         | BCL2A1        | BCL2-related protein A1                                       | Cytoplasm           | other                      | N                               | 43.582    | 0.000      | 1.458         | 0.802          | 1.788         | 0.330          |
| gi_114051635_ref_NM_001046438.1_ | 538730         | NRN1          | neuritin 1                                                    | Cytoplasm           | other                      | N                               | 36.912    | 0.000      | 2.077         | 0.046          | 1.452         | 0.948          |
| gi_154152112_ref_NM_001100345.1_ | 511799         | LEPREL1       | leprecan-like 1                                               | unknown             | enzyme                     | N                               | 32.519    | 0.000      | 1.744         | 0.239          | 1.353         | 1.142          |
| gi_167583539_ref_NM_001114506.1_ | 504507         | TNFSF13B      | tumor necrosis factor (ligand) superfamily, member 13b        | Extracellular Space | cytokine                   | N                               | 20.670    | 0.000      | 2.146         | 0.031          | 1.326         | 1.211          |
| gi_115496847_ref_NM_001076375.1_ | 615436         | AFAP1L2       | actin filament associated protein 1-like 2                    | Cytoplasm           | other                      | N                               | 12.052    | 0.000      | 2.018         | 0.060          | 3.672         | 0.001          |
| gi_119893058_ref_XM_868762.2_    | 616674         | CLEC4A        | C-type lectin domain family 4, member A                       | Plasma Membrane     | transmembrane receptor     | N                               | 10.246    | 0.000      | 3.657         | 0.000          | 1.866         | 0.251          |
| gi_119908296_ref_XM_868619.2_    | 616569         |               |                                                               |                     |                            | N                               | 9.925     | 0.000      | -6.584        | 0.000          | -5.966        | 0.000          |
| gi_31341597_ref_NM_174588.2_     | 282329         | PTGER2        | prostaglandin E receptor 2 (subtype EP2), 53kDa               | Plasma Membrane     | G-protein coupled receptor | N                               | 6.462     | 0.000      | -1.461        | 0.050          | -3.223        | 0.000          |
| gi_149944706_ref_NM_001099010.1_ | 519269         | RRAS2         | related RAS viral (r-ras) oncogene homolog 2                  | Plasma Membrane     | enzyme                     | N                               | 6.198     | 0.000      | 3.471         | 0.000          | 6.574         | 0.000          |
| gi_89886438_ref_NM_001039726.1_  | 281422         | PRLR          | prolactin receptor                                            | Plasma Membrane     | transmembrane receptor     | N                               | 6.067     | 0.000      | -2.220        | 0.000          | -4.282        | 0.000          |
| gi_31341440_ref_NM_173879.2_     | 280687         | F5            | coagulation factor V (proaccelerin, labile factor)            | Plasma Membrane     | other                      | N                               | 5.666     | 0.000      | 1.151         | 1.195          | 1.782         | 0.312          |
| gi_122692332_ref_NM_001080372.1_ | 788454         | GM41          | predicted gene 41                                             | unknown             | other                      | N                               | 4.332     | 0.000      | -1.623        | 0.005          | -3.178        | 0.000          |
| gi_119903179_ref_XM_871776.2_    | 520709         | IL1RL1        | interleukin 1 receptor-like 1                                 | Plasma Membrane     | transmembrane receptor     | N                               | 4.195     | 0.000      | -2.315        | 0.000          | -3.775        | 0.000          |
| gi_115495866_ref_NM_001076246.1_ | 540853         | SNAP25        | synaptosomal-associated protein, 25kDa                        | Plasma Membrane     | transporter                | N                               | 3.536     | 0.000      | -1.141        | 0.412          | -1.069        | 0.776          |
| gi_115497747_ref_NM_001075596.1_ | 513055         |               |                                                               |                     |                            | N                               | 3.403     | 0.000      | 4.314         | 0.000          | 4.768         | 0.000          |
| gi_78050044_ref_NM_001035072.1_  | 509578         | CD96          | CD96 molecule                                                 | Plasma Membrane     | other                      | N                               | 2.976     | 0.000      | -2.167        | 0.000          | -1.993        | 0.001          |
| gi_139948963_ref_NM_001083752.1_ | 540702         | C3AR1         | complement component 3a receptor 1                            | Plasma Membrane     | G-protein coupled receptor | N                               | 2.761     | 0.000      | 1.144         | 1.214          | 1.811         | 0.291          |
| gi_115496797_ref_NM_001075859.1_ | 524513         | SERPINB9      | serpin peptidase inhibitor, clade B (ovalbumin), member 9     | Cytoplasm           | other                      | N                               | 2.489     | 0.000      | -1.450        | 0.024          | -1.578        | 0.015          |
| gi_119893892_ref_XM_612028.3_    | 280832         | KIT           | v-kit Hardy-Zuckerman 4 feline sarcoma viral oncogene homolog | Plasma Membrane     | kinase                     | N                               | 2.351     | 0.000      | 1.445         | 0.720          | 6.956         | 0.000          |
| gi_156120552_ref_NM_001101952.1_ | 512227         | ACSM2A        | acyl-CoA synthetase medium-chain family member 2A             | unknown             | other                      | N                               | 2.298     | 0.000      | 1.117         | 1.008          | -1.275        | 0.197          |
| gi_70778751_ref_NM_001025344.1_  | 538951         | NANOG         | Nanog homeobox                                                | Nucleus             | transcription regulator    | N                               | 2.261     | 0.000      | -2.393        | 0.000          | -2.434        | 0.000          |
| gi_125991883_ref_NM_001081579.1_ | 504991         | ANKRD22       | ankyrin repeat domain 22                                      | Nucleus             | transcription regulator    | N                               | 2.176     | 0.000      | 1.233         | 1.249          | -1.005        | 0.797          |
| gi_119908651_ref_XM_866033.2_    | 614500         |               |                                                               |                     |                            | N                               | 2.020     | 0.001      | -1.807        | 0.002          | -1.774        | 0.004          |
| gi_115497133_ref_NM_001075864.1_ | 525072         | PLA2G4A       | phospholipase A2, group IVA (cytosolic, calcium-dependent)    | Cytoplasm           | enzyme                     | N                               | 1.941     | 0.001      | 1.505         | 0.559          | -1.488        | 0.041          |
| gi_115497379_ref_NM_001075626.1_ | 513537         | ALDH8A1       | aldehyde dehydrogenase 8 family, member A1                    | unknown             | enzyme                     | N                               | 1.716     | 0.004      | 2.607         | 0.004          | 2.040         | 0.128          |
| gi_119887028_ref_XM_592594.3_    | 514701         | FAM3B         | family with sequence similarity 3, member B                   | Extracellular Space | cytokine                   | N                               | 1.684     | 0.005      | 1.487         | 0.585          | 1.344         | 1.116          |
| gi_147898888_ref_NM_001098163.1_ | 100036590      | KLRC1         | killer cell lectin-like receptor subfamily C, member 1        | Plasma Membrane     | transmembrane receptor     | N                               | 1.654     | 0.007      | -1.067        | 0.369          | -1.611        | 0.011          |
| gi_119919810_ref_XM_001252953.1_ | 784732         |               |                                                               |                     |                            | N                               | 1.497     | 0.014      | -1.652        | 0.008          | -1.786        | 0.004          |
| gi_77735504_ref_NM_001034275.1_  | 507026         | ICOS          | inducible T-cell co-stimulator                                | Plasma Membrane     | other                      | N                               | 1.490     | 0.016      | -1.175        | 0.271          | -1.562        | 0.021          |
| gi_119922384_ref_XM_001254389.1_ | 786820         | GM41          | predicted gene 41                                             | unknown             | other                      | N                               | 1.480     | 0.021      | -1.227        | 0.324          | -1.737        | 0.006          |
| gi_156121332_ref_NM_001102345.1_ | 787444         | NKAIN2        | Na+/K+ transporting ATPase interacting 2                      | unknown             | other                      | N                               | 1.441     | 0.024      | -1.037        | 0.929          | 1.015         | 1.090          |
| gi_157785610_ref_NM_001105636.1_ | 751790         | UGT1A1        | UDP glucuronosyltransferase 1 family, polypeptide A1          | Cytoplasm           | enzyme                     | N                               | 1.424     | 0.029      | 7.186         | 0.000          | 3.049         | 0.005          |
| gi_115495972_ref_NM_001075520.1_ | 511498         | CYP2C44       | cytochrome P450, family 2, subfamily c, polypeptide 44        | Cytoplasm           | enzyme                     | N                               | 1.420     | 0.030      | -1.508        | 0.020          | -1.828        | 0.003          |
| gi_119923335_ref_XM_592662.3_    | 514757         |               |                                                               |                     |                            | N                               | 1.420     | 0.037      | -1.418        | 0.074          | -1.567        | 0.017          |
| gi_119909794_ref_XM_596586.3_    | 518395         | ADAMTS18      | ADAM metalloproteinase with thrombospondin type 1 motifs      | Extracellular Space | peptidase                  | N                               | 1.415     | 0.029      | 2.556         | 0.005          | 2.227         | 0.061          |
| gi_119922231_ref_XM_001254266.1_ | 786636         |               |                                                               |                     |                            | N                               | 1.414     | 0.027      | 1.157         | 1.129          | -1.388        | 0.103          |
| gi_119907873_ref_XM_599338.3_    | 521081         | 4833423E24RIK | RIKEN cDNA 4833423E24 gene                                    | unknown             | other                      | N                               | 1.380     | 0.036      | -1.759        | 0.004          | -1.469        | 0.056          |
| gi_31342852_ref_NM_174097.2_     | 281270         | HOPX          | HOP homeobox                                                  | Nucleus             | transcription regulator    | N                               | 1.356     | 0.043      | -1.138        | 0.443          | -1.611        | 0.011          |
| gi_31341980_ref_NM_174445.2_     | 282023         | PTGS2         | prostaglandin-endoperoxide synthase 2 (cyclooxygenase 2)      | Cytoplasm           | enzyme                     | N                               | 1.317     | 0.055      | -1.130        | 0.502          | 1.050         | 1.007          |

**Table S4B: No change between BL20 and TBL20**

| SEQ_ID                           | Entrez gene ID | Symbol | Entrez Gene Name                                 | Location        | Type                    | Predicted BL20 expression level | FC        |            | FDR           |                |               |                |
|----------------------------------|----------------|--------|--------------------------------------------------|-----------------|-------------------------|---------------------------------|-----------|------------|---------------|----------------|---------------|----------------|
|                                  |                |        |                                                  |                 |                         |                                 | FC BLVtBL | FDR BLVtBL | FC TBLvTBL24h | FDR TBLvTBL24h | FC TBLvTBL48h | FDR TBLvTBL48h |
| gi_119903302_ref_XM_588244.3_    | 511001         | CLEC4F | C-type lectin domain family 4, member F          | Plasma Membrane | other                   | L                               | -1.609    | 1.15       | 5.864         | 0.000          | 56.038        | 0.000          |
| gi_66792901_ref_NM_001024556.1_  | 526704         | VNN1   | vanin 1                                          | Plasma Membrane | enzyme                  | N                               | -1.351    | 1.321      | 2.957         | 0.000          | 24.904        | 0.000          |
| gi_156120930_ref_NM_001102142.1_ | 531995         | SP7    | Sp7 transcription factor                         | Nucleus         | transcription regulator | L                               | -1.480    | 1.324      | 5.955         | 0.000          | 17.168        | 0.000          |
| gi_119914328_ref_XM_589824.3_    | 615277         |        |                                                  |                 |                         | N                               | -1.152    | 1.129      | 5.949         | 0.000          | 11.605        | 0.000          |
| gi_114051859_ref_NM_001045963.1_ | 507285         | CHN2   | chimerin (chimaerin) 2                           | Cytoplasm       | other                   | L                               | -1.577    | 1.259      | 5.176         | 0.000          | 8.349         | 0.000          |
| gi_115495332_ref_NM_001075143.1_ | 404173         |        |                                                  |                 |                         | H                               | -1.616    | 1.17       | 1.175         | 1.254          | 8.065         | 0.000          |
| gi_157785549_ref_NM_174320.3_    | 281773         | FXYD2  | FXYD domain containing ion transport regulator 2 | Plasma Membrane | ion channel             | L                               | -1.302    | 1.364      | 3.962         | 0.000          | 6.688         | 0.000          |
| gi_119902602_ref_XM_611694.3_    | 532574         | MYO5C  | myosin VC                                        | unknown         | other                   | H                               | -1.389    | 1.389      | 7.973         | 0.000          | 6.255         | 0.000          |
| gi_119910346_ref_XM_001253667.1_ | 785741         | ZBTB32 | zinc finger and BTB domain containing 32         | Nucleus         | transcription regulator | H                               | -1.416    | 1.359      | 4.011         | 0.000          | 6.205         | 0.000          |
| gi_119922570_ref_XM_001254638.1_ | 787162         | ARMCX6 | armadillo repeat containing, X-linked 6          | unknown         | other                   | H                               | -1.697    | 1.053      | 4.351         | 0.000          | 6.084         | 0.000          |

|                                  |           |                          |                                                                 |                     |                               |    |        |       |        |       |        |       |
|----------------------------------|-----------|--------------------------|-----------------------------------------------------------------|---------------------|-------------------------------|----|--------|-------|--------|-------|--------|-------|
| gi_119906549_ref_XM_877427.2     | 511188    | EYA1                     | eyes absent homolog 1 (Drosophila)                              | Nucleus             | phosphatase                   | L  | -1.265 | 1.248 | 3.740  | 0.000 | 5.918  | 0.000 |
| gi_156120694_ref_NM_001102024.1  | 515418    | CD1A                     | CD1a molecule                                                   | Plasma Membrane     | other                         | N  | -1.168 | 1.109 | 4.224  | 0.000 | 5.756  | 0.000 |
| gi_119914342_ref_XM_871103.2     | 509670    | XIRP1                    | xin actin-binding repeat containing 1                           | Plasma Membrane     | other                         | L  | -1.551 | 1.217 | 3.174  | 0.000 | 5.696  | 0.000 |
| gi_119922350_ref_XM_583562.3     | 507019    | ADAM28                   | ADAM metallopeptidase domain 28                                 | Plasma Membrane     | peptidase                     | L  | -1.218 | 1.237 | 6.711  | 0.000 | 5.223  | 0.000 |
| gi_90403615_ref_NM_001039957.1   | 407124    |                          |                                                                 |                     |                               | M  | -1.501 | 1.296 | 2.320  | 0.014 | 5.086  | 0.000 |
| gi_59676571_ref_NM_001012284.1   | 497204    | UBA7                     | ubiquitin-like modifier activating enzyme 7                     | Cytoplasm           | enzyme                        | M  | -1.257 | 1.273 | 1.765  | 0.195 | 4.913  | 0.000 |
| gi_114051673_ref_NM_001046435.1  | 538675    | CALCOOCO1                | calcium binding and coiled-coil domain 1                        | Nucleus             | transcription regulator       | H  | -1.401 | 1.389 | 2.751  | 0.002 | 4.896  | 0.000 |
| gi_66792763_ref_NM_001024486.1   | 506687    | SLC37A2                  | solute carrier family 37 (glycerol-3-phosphate transporter), m  | unknown             | transporter                   | H  | -1.227 | 1.289 | 3.751  | 0.000 | 4.751  | 0.000 |
| gi_31342589_ref_NM_174209.2      | 281559    | UACA                     | uveal autoantigen with coiled-coil domains and ankyrin repeats  | Cytoplasm           | other                         | L  | -1.206 | 1.167 | 5.477  | 0.000 | 4.568  | 0.000 |
| gi_76659999_ref_XM_612871.2      | 540732    | ACER2                    | alkaline ceramidase 2                                           | unknown             | other                         | H  | -1.551 | 1.238 | 2.997  | 0.000 | 4.485  | 0.000 |
| gi_76611576_ref_XM_587002.2      | 407136    | HTR1D                    | 5-hydroxytryptamine (serotonin) receptor 1D                     | Plasma Membrane     | G-protein coupled receptor    | L  | -1.473 | 1.262 | 1.955  | 0.063 | 4.474  | 0.000 |
| gi_119901918_ref_XM_864907.2     | 511279    | SMAD6                    | SMAD family member 6                                            | Nucleus             | transcription regulator       | L  | -1.659 | 1.01  | 2.819  | 0.001 | 4.357  | 0.000 |
| gi_116003876_ref_NM_001076828.1  | 510532    | PARP9                    | poly (ADP-ribose) polymerase family, member 9                   | Nucleus             | other                         | H  | -1.266 | 1.335 | 3.643  | 0.000 | 4.327  | 0.000 |
| gi_115495538_ref_NM_001075430.1  | 510102    | RARRES1                  | retinoic acid receptor responder (tazarotene induced) 1         | Plasma Membrane     | other                         | VH | -1.370 | 1.387 | 2.673  | 0.003 | 4.248  | 0.000 |
| gi_115495706_ref_NM_001075507.1  | 511291    | CHPT1                    | choline phosphotransferase 1                                    | unknown             | enzyme                        | N  | -1.220 | 1.202 | 4.984  | 0.000 | 4.209  | 0.000 |
| gi_119911597_ref_XM_587287.3     | 510175    | PROCA1                   | protein interacting with cyclin A1                              | unknown             | other                         | H  | -1.662 | 1.146 | 2.406  | 0.010 | 4.155  | 0.000 |
| gi_119917459_ref_XM_580537.3     | 538469    | SLC16A12                 | solute carrier family 16, member 12 (monocarboxylic acid tra    | unknown             | other                         | H  | -1.639 | 1.169 | 2.901  | 0.000 | 4.122  | 0.000 |
| gi_157074195_ref_NM_001103342.1  | 100125309 |                          |                                                                 |                     |                               | H  | -1.263 | 1.242 | 2.489  | 0.006 | 4.079  | 0.000 |
| gi_134085668_ref_NM_001083451.1  | 527470    | RORC                     | RAR-related orphan receptor C                                   | Nucleus             | ligand-dependent nuclear rece | L  | -1.236 | 1.132 | 2.306  | 0.014 | 4.023  | 0.000 |
| gi_149642800_ref_NM_001098963.1  | 513785    | GABBR1                   | gamma-aminobutyric acid (GABA) B receptor, 1                    | Plasma Membrane     | G-protein coupled receptor    | H  | -1.413 | 1.352 | 1.839  | 0.136 | 4.023  | 0.000 |
| gi_156120784_ref_NM_001102069.1  | 522763    |                          |                                                                 |                     |                               | H  | -1.297 | 1.337 | 4.017  | 0.000 | 4.005  | 0.000 |
| gi_115495928_ref_NM_001076243.1  | 540828    | PHYHD1                   | phytanoyl-CoA dioxygenase domain containing 1                   | unknown             | other                         | H  | -1.574 | 1.272 | 2.277  | 0.017 | 3.972  | 0.000 |
| gi_119913871_ref_XM_617995.3     | 537810    | AKAP6                    | A kinase (PRKA) anchor protein 6                                | Nucleus             | other                         | L  | -1.519 | 1.305 | 2.691  | 0.003 | 3.909  | 0.001 |
| gi_139949223_ref_NM_001083720.1  | 533523    | DDR2                     | discoidin domain receptor tyrosine kinase 2                     | Plasma Membrane     | kinase                        | M  | -1.597 | 1.222 | 2.884  | 0.001 | 3.846  | 0.001 |
| gi_119913160_ref_XM_0010251499.1 | 511595    | PARP8                    | poly (ADP-ribose) polymerase family, member 8                   | unknown             | other                         | VH | -1.305 | 1.329 | 2.533  | 0.005 | 3.833  | 0.001 |
| gi_119914298_ref_XR_028825.1     | 509859    |                          |                                                                 |                     |                               | H  | -1.539 | 1.245 | 2.022  | 0.050 | 3.815  | 0.001 |
| gi_115495998_ref_NM_001076232.1  | 540667    | 39508                    | membrane-associated ring finger (C3HC4) 8                       | Cytoplasm           | other                         | H  | -1.370 | 1.381 | 2.369  | 0.011 | 3.523  | 0.001 |
| gi_116003900_ref_NM_001076841.1  | 512672    | H2-T24                   | histocompatibility 2, T region locus 24                         | unknown             | other                         | H  | -1.299 | 1.306 | 2.863  | 0.001 | 3.422  | 0.001 |
| gi_119914325_ref_XM_616073.3     | 535956    | SCN11A                   | sodium channel, voltage-gated, type XI, alpha subunit           | Plasma Membrane     | ion channel                   | L  | -1.325 | 1.111 | 2.338  | 0.012 | 3.418  | 0.002 |
| gi_78365258_ref_NM_001035400.1   | 533618    | ARSK                     | arylsulfatase family, member K                                  | Extracellular Space | enzyme                        | H  | -1.571 | 1.262 | 3.160  | 0.000 | 3.336  | 0.002 |
| gi_114052345_ref_NM_001046348.1  | 533321    | RIKEN cDNA 2310002L09RIK | RIKEN cDNA 2310002L09 gene                                      | unknown             | other                         | M  | -1.318 | 1.108 | 2.685  | 0.002 | 3.306  | 0.003 |
| gi_119906688_ref_XM_601083.3     | 522795    | KLF10                    | Kruppel-like factor 10                                          | Nucleus             | transcription regulator       | H  | -1.750 | 1.019 | 2.065  | 0.047 | 3.260  | 0.003 |
| gi_119890208_ref_XM_588670.3     | 511350    | CC2D1B                   | coiled-coil and C2 domain containing 1B                         | unknown             | other                         | H  | -1.178 | 1.174 | 1.651  | 0.357 | 3.260  | 0.003 |
| gi_149642646_ref_NM_001099168.1  | 617625    | RBM43                    | RNA binding motif protein 43                                    | unknown             | other                         | H  | -1.653 | 1.181 | 2.502  | 0.006 | 3.201  | 0.003 |
| gi_77735692_ref_NM_001034368.1   | 509896    | ABHD4                    | abhydrolase domain containing 4                                 | unknown             | peptidase                     | H  | -1.755 | 1.009 | 2.257  | 0.019 | 3.201  | 0.003 |
| gi_77735580_ref_NM_001034314.1   | 508132    | NAGK                     | N-acetylglucosamine kinase                                      | Cytoplasm           | kinase                        | H  | -1.428 | 1.369 | 1.125  | 0.032 | 3.178  | 0.003 |
| gi_78370160_ref_NM_001035483.1   | 616801    | TRAF3IP2                 | TRAF3 interacting protein 2                                     | unknown             | other                         | H  | -1.376 | 1.39  | 2.271  | 0.017 | 3.157  | 0.003 |
| gi_119912581_ref_XR_027582.1     | 782067    | PITPNC1                  | phosphatidylinositol transfer protein, cytoplasmic 1            | Cytoplasm           | transporter                   | H  | -1.569 | 1.272 | 1.724  | 0.269 | 3.153  | 0.003 |
| gi_119905187_ref_XM_606371.3     | 527964    | PARD3                    | par-3 partitioning defective 3 homolog (C. elegans)             | Plasma Membrane     | other                         | L  | -1.442 | 1.359 | 2.480  | 0.006 | 3.092  | 0.004 |
| gi_119911873_ref_XM_583737.3     | 507171    | CYB5D1                   | cytochrome b5 domain containing 1                               | unknown             | other                         | H  | -1.647 | 1.099 | 2.224  | 0.020 | 3.084  | 0.004 |
| gi_119880356_ref_XM_866793.2     | 533510    | KLHL24                   | kelch-like 24 (Drosophila)                                      | unknown             | other                         | VH | -1.509 | 1.335 | 2.096  | 0.042 | 3.081  | 0.004 |
| gi_78365245_ref_NM_001035418.1   | 537718    | ARHGGEF9                 | Cdc42 guanine nucleotide exchange factor (GEF) 9                | Cytoplasm           | other                         | H  | -1.330 | 1.327 | 2.351  | 0.011 | 3.077  | 0.004 |
| gi_119889996_ref_XR_028184.1     | 508347    | IFI44L                   | interferon-induced protein 44-like                              | unknown             | other                         | H  | -1.121 | 1.08  | 2.321  | 0.014 | 3.031  | 0.005 |
| gi_119891466_ref_XM_869387.2     | 617183    |                          |                                                                 |                     |                               | L  | -1.262 | 1.237 | 3.486  | 0.000 | 3.024  | 0.005 |
| gi_119910902_ref_XR_028394.1     | 618463    | SIGLEC12                 | sialic acid binding Ig-like lectin 12                           | Plasma Membrane     | other                         | L  | -1.513 | 1.309 | 1.393  | 0.903 | 3.024  | 0.005 |
| gi_119930198_ref_XM_001251085.1  | 786617    | ZNF280B                  | zinc finger protein 280B                                        | Nucleus             | other                         | M  | -1.396 | 1.381 | -1.477 | 0.017 | -3.007 | 0.000 |
| gi_84000064_ref_NM_001038041.1   | 505855    |                          |                                                                 |                     |                               | H  | -1.653 | 1.155 | -1.642 | 0.009 | -3.291 | 0.000 |
| gi_115497007_ref_NM_001075292.1  | 506986    | SEC61B                   | Sec61 beta subunit                                              | Cytoplasm           | transporter                   | M  | -1.189 | 1.157 | -2.223 | 0.000 | -4.028 | 0.000 |
| gi_156120382_ref_NM_001101867.1  | 506282    | EMID1                    | EMI domain containing 1                                         | Extracellular Space | other                         | H  | -1.347 | 1.371 | -4.284 | 0.000 | -4.141 | 0.000 |
| gi_119889055_ref_XM_584927.3     | 508183    | SLAMF6                   | SLAM family member 6                                            | Plasma Membrane     | transmembrane receptor        | H  | -1.475 | 1.354 | 3.977  | 0.000 | 2.417  | 0.031 |
| gi_139948604_ref_NM_001083695.1  | 516522    | FRRS1                    | ferric-chelate reductase 1                                      | Plasma Membrane     | transmembrane receptor        | M  | -1.558 | 1.214 | 3.444  | 0.000 | 2.845  | 0.008 |
| gi_119902080_ref_XM_588656.3     | 407204    |                          |                                                                 |                     |                               | L  | -1.227 | 1.071 | 3.378  | 0.000 | 2.085  | 0.107 |
| gi_122692458_ref_NM_001080307.1  | 538604    | ABI3BP                   | ABI family, member 3 (NESH) binding protein                     | unknown             | other                         | L  | -1.502 | 1.211 | 3.374  | 0.000 | 2.639  | 0.014 |
| gi_150247098_ref_NM_001099388.1  | 539898    | ZBED5                    | zinc finger, BED-type containing 5                              | Nucleus             | other                         | H  | -1.737 | 1.059 | 3.170  | 0.000 | 2.901  | 0.006 |
| gi_119916198_ref_XM_868601.2     | 616555    | OSBPL1A                  | oxysterol binding protein-like 1A                               | Cytoplasm           | other                         | H  | -1.214 | 1.261 | 3.163  | 0.000 | 2.815  | 0.008 |
| gi_84370144_ref_NM_001038558.1   | 529873    | CADM1                    | cell adhesion molecule 1                                        | Plasma Membrane     | other                         | L  | -1.715 | 1.026 | 3.099  | 0.000 | 2.451  | 0.026 |
| gi_119905251_ref_XM_864298.2     | 613475    | MSRB2                    | methionine sulfoxide reductase B2                               | Nucleus             | transcription regulator       | VH | -1.416 | 1.388 | 3.091  | 0.000 | 2.561  | 0.019 |
| gi_126165263_ref_NM_001081712.1  | 505820    | SERPINA3                 | serpin peptidase inhibitor, clade A (alpha-1 antiproteinase, ar | Extracellular Space | other                         | L  | -1.495 | 1.295 | 3.066  | 0.000 | 2.181  | 0.073 |
| gi_119895022_ref_XR_028583.1     | 510442    |                          |                                                                 |                     |                               | VH | -1.157 | 1.12  | -3.052 | 0.000 | -1.309 | 0.211 |
