# Supplementary material for: A Bovine Lymphosarcoma Cell Line Infected with Theileria annulata Exhibits an Irreversible Reconfiguration of Host Cell Gene Expression
Source: PubMed Central journal article supplement (PMC3694138; doi:10.1371/journal.pone.0066833), 2013-06-26
Supplement: pone.0066833.s007.pdf [file pone.0066833.s007.pdf]

**Table S5: Cell cycle associated genes**

| Symbol/Class          | Entrez Gene Name                                                    | Entrez Gene ID | FC     | BPQ Response |   |
|-----------------------|---------------------------------------------------------------------|----------------|--------|--------------|---|
| <b>CDKs</b>           |                                                                     |                |        |              |   |
| PFTK1                 | PFTAIRE protein kinase 1                                            | 784403         | 7.55 ▲ | -            | - |
| CDK3                  | cyclin-dependent kinase 3                                           | 618631         | 1.90 ▲ | -            | - |
| <b>Cyclins</b>        |                                                                     |                |        |              |   |
| CCNA1                 | cyclin A1                                                           | 521939         | 3.85 ▼ | 4.38 ▲       |   |
| CCNE1                 | cyclin E1                                                           | 533526         | 1.32 ▲ | 1.88 ▼       |   |
| CCNA2                 | cyclin A2                                                           | 281667         | 1.31 ▲ | 1.61 ▼       |   |
| CCNYL1                | cyclin Y-like 1                                                     | 538167         | 1.38 ▲ | -            | - |
| CCND2                 | cyclin D2                                                           | 615414         | -      | 1.46 ▼       |   |
| CCNE2                 | cyclin E2                                                           | 538436         | -      | 2.16 ▼       |   |
| CCNG2                 | cyclin G2                                                           | 512960         | -      | 2.57 ▲       |   |
| <b>CDK Inhibitors</b> |                                                                     |                |        |              |   |
| CDKN2D                | cyclin-dependent kinase inhibitor 2D (p19, inhibits CDK4)           | 510244         | 4.99 ▼ | -            |   |
| CDKN1B                | cyclin-dependent kinase inhibitor 1B (p27, Kip1)                    | 512613         | 3.52 ▼ | -            |   |
| CDKN1C                | cyclin-dependent kinase inhibitor 1C (p57, Kip2)                    | 510972         | 3.22 ▼ | -            |   |
| CDKN2C                | cyclin-dependent kinase inhibitor 2C (p18, inhibits CDK4)           | 505691         | 3.12 ▼ | -            |   |
| CDKN2A                | cyclin-dependent kinase inhibitor 2A (melanoma, p16, inhibits CDK4) | 616369         | 2.96 ▼ | -            |   |
| <b>CDK-activation</b> |                                                                     |                |        |              |   |
| CDC25A                | cell division cycle 25 homolog A (S. pombe)                         | 520188         | 1.42 ▲ | 2.06 ▼       |   |
