# Supplementary material for: A Bovine Lymphosarcoma Cell Line Infected with Theileria annulata Exhibits an Irreversible Reconfiguration of Host Cell Gene Expression
Source: PubMed Central journal article supplement (PMC3694138; doi:10.1371/journal.pone.0066833), 2013-06-26
Supplement: pone.0066833.s008.pdf [file pone.0066833.s008.pdf]

**Table S6A: Extracellular - cytokines and growth factors**

| SEQ_ID                           | Entrez gene ID | Symbol   | Entrez Gene Name                                                   | Location            | Type          | Predicted BL20 expression level | FC        |             |            |                |               |                |
|----------------------------------|----------------|----------|--------------------------------------------------------------------|---------------------|---------------|---------------------------------|-----------|-------------|------------|----------------|---------------|----------------|
|                                  |                |          |                                                                    |                     |               |                                 | FC BLvTBL | FDR BLvsTBL | TBLvTBL24h | FDR TBLvTBL24h | FC TBLvTBL48h | FDR TBLvTBL48h |
| gi_31342239_ref_NM_175716.2_     | 319096         | XL2L     | chemokine (C motif) ligand 2                                       | Extracellular Space | cytokine      | L                               | 741.977   | 0.000       | -18.786    | 0.000          | -12.467       | 0.000          |
| gi_119917127_ref_XM_870373.2_    | 618042         | VGF      | VGF nerve growth factor inducible                                  | Extracellular Space | growth factor | M                               | 31.809    | 0.000       | -12.728    | 0.000          | -6.743        | 0.000          |
| gi_119911540_ref_XM_001253061.1_ | 786204         | CCL1     | chemokine (C-C motif) ligand 1                                     | Extracellular Space | cytokine      | M                               | 30.930    | 0.000       | -15.202    | 0.000          | -15.172       | 0.000          |
| gi_167583539_ref_NM_001114506.1_ | 504507         | TNFSF13B | tumor necrosis factor (ligand) superfamily, member 13              | Extracellular Space | cytokine      | N                               | 20.670    | 0.000       | 2.146      | 0.031          | 1.326         | 1.211          |
| gi_31342229_ref_NM_174357.2_     | 281860         | IL1RN    | interleukin 1 receptor antagonist                                  | Extracellular Space | cytokine      | L                               | 17.914    | 0.000       | -2.608     | 0.000          | -1.868        | 0.002          |
| gi_31343615_ref_NM_175827.2_     | 327712         | CCL5     | chemokine (C-C motif) ligand 5                                     | Extracellular Space | cytokine      | M                               | 10.841    | 0.000       | -1.524     | 0.023          | -2.809        | 0.000          |
| gi_114052748_ref_NM_001046551.1_ | 615107         | CXCL10   | chemokine (C-X-C motif) ligand 10                                  | Extracellular Space | cytokine      | L                               | 7.821     | 0.000       | -7.216     | 0.000          | -8.178        | 0.000          |
| gi_154152166_ref_NM_001100365.1_ | 514933         | EBI3     | Epstein-Barr virus induced 3                                       | Extracellular Space | cytokine      | L                               | 6.837     | 0.000       | -1.108     | 0.671          | 1.813         | 0.292          |
| gi_115497115_ref_NM_001076483.1_ | 617915         | ANGPT4   | angiopoietin 4                                                     | Extracellular Space | growth factor | H                               | 6.317     | 0.000       | -1.951     | 0.000          | -2.488        | 0.000          |
| gi_119884701_ref_XM_583785.3_    | 507215         | TNFSF10  | tumor necrosis factor (ligand) superfamily, member 10              | Extracellular Space | cytokine      | M                               | 4.526     | 0.000       | 2.292      | 0.015          | 2.362         | 0.036          |
| gi_119896170_ref_XM_593584.3_    | 515549         | IFNW1    | interferon, omega 1                                                | Extracellular Space | cytokine      | L                               | 3.866     | 0.000       | -2.052     | 0.000          | -3.302        | 0.000          |
| gi_31343249_ref_NM_173924.2_     | 280827         | IL7      | interleukin 7                                                      | Extracellular Space | cytokine      | L                               | 3.741     | 0.000       | -1.078     | 0.753          | -2.570        | 0.000          |
| gi_76668250_ref_XM_589595.2_     | 539800         | TNFSF4   | tumor necrosis factor (ligand) superfamily, member 4               | Extracellular Space | cytokine      | M                               | 3.633     | 0.000       | -2.115     | 0.000          | -1.930        | 0.001          |
| gi_31343004_ref_NM_174027.2_     | 281095         | CSF2     | colony stimulating factor 2 (granulocyte-macrophage)               | Extracellular Space | cytokine      | L                               | 3.541     | 0.000       | -3.935     | 0.000          | -3.576        | 0.000          |
| gi_119911538_ref_XM_001253011.1_ | 786156         | CCL1     | chemokine (C-C motif) ligand 1                                     | Extracellular Space | cytokine      | H                               | 3.371     | 0.000       | -6.822     | 0.000          | -9.536        | 0.000          |
| gi_149773587_ref_NM_001099162.1_ | 616996         | CCL22    | chemokine (C-C motif) ligand 22                                    | Extracellular Space | cytokine      | L                               | 3.144     | 0.000       | -2.312     | 0.000          | -1.853        | 0.002          |
| gi_118150781_ref_NM_001077828.1_ | 281239         | IGF1     | insulin-like growth factor 1 (somatomedin C)                       | Extracellular Space | growth factor | L                               | 2.780     | 0.000       | 1.475      | 0.726          | 1.528         | 0.684          |
| gi_119905043_ref_XM_001251494.1_ | 783681         | JAG1     | jagged 1 (Alagille syndrome)                                       | Extracellular Space | growth factor | L                               | 2.457     | 0.000       | 1.236      | 1.257          | 1.019         | 1.104          |
| gi_114052243_ref_NM_001046358.1_ | 533671         | CMTM8    | CKLF-like MARVEL transmembrane domain containing 8                 | Extracellular Space | cytokine      | H                               | 2.427     | 0.000       | -1.780     | 0.002          | -2.289        | 0.000          |
| gi_31343250_ref_NM_173925.2_     | 280828         | IL8      | interleukin 8                                                      | Extracellular Space | cytokine      | L                               | 2.216     | 0.000       | -1.141     | 0.520          | 1.819         | 0.275          |
| gi_77736244_ref_NM_001034647.1_  | 538567         | TNFSF13  | tumor necrosis factor (ligand) superfamily, member 13              | Extracellular Space | cytokine      | M                               | 2.077     | 0.001       | -1.465     | 0.041          | -1.767        | 0.004          |
| gi_119911822_ref_XM_001254761.1_ | 788103         | TNFSF12  | tumor necrosis factor (ligand) superfamily, member 12              | Extracellular Space | cytokine      | H                               | 1.977     | 0.001       | 1.082      | 1.145          | 1.034         | 1.157          |
| gi_75812913_ref_NM_001033608.1_  | 280858         | MIF      | macrophage migration inhibitory factor (glycosylation-independent) | Extracellular Space | cytokine      | VH                              | 1.941     | 0.001       | -2.126     | 0.000          | -2.049        | 0.000          |
| gi_119887028_ref_XM_592594.3_    | 514701         | FAM3B    | family with sequence similarity 3, member B                        | Extracellular Space | cytokine      | N                               | 1.684     | 0.005       | 1.487      | 0.585          | 1.344         | 1.116          |
| gi_31341809_ref_NM_181030.2_     | 282233         | FLT3LG   | fms-related tyrosine kinase 3 ligand                               | Extracellular Space | cytokine      | H                               | 1.556     | 0.008       | -1.219     | 0.412          | -1.295        | 0.271          |
| gi_116004250_ref_NM_001077014.1_ | 767942         | GRN      | granulin                                                           | Extracellular Space | growth factor | H                               | 1.549     | 0.009       | 1.967      | 0.081          | 2.576         | 0.018          |
| gi_119908328_ref_XM_001252797.1_ | 784352         | FASLG    | Fas ligand (TNF superfamily, member 6)                             | Extracellular Space | cytokine      | H                               | -2.979    | 0.048       | -1.586     | 0.015          | -1.634        | 0.012          |
| gi_116004478_ref_NM_001077129.1_ | 768073         | OSGIN1   | oxidative stress induced growth inhibitor 1                        | unknown             | growth factor | M                               | -3.317    | 0.025       | 1.022      | 0.654          | 1.227         | 1.263          |
| gi_119908200_ref_XM_613627.3_    | 534018         | LEFTY2   | left-right determination factor 2                                  | Extracellular Space | growth factor | M                               | -3.379    | 0.018       | -1.022     | 0.854          | 1.025         | 1.110          |
| gi_119892499_ref_XR_028517.1_    | 540517         | GDF11    | growth differentiation factor 11                                   | Extracellular Space | growth factor | H                               | -3.429    | 0.018       | -1.141     | 0.574          | 1.067         | 1.232          |
| gi_75832046_ref_NM_173935.2_     | 280852         | MDK      | midkine (neurite growth-promoting factor 2)                        | Extracellular Space | growth factor | H                               | -3.479    | 0.013       | 1.293      | 1.235          | 1.662         | 0.501          |
| gi_119909004_ref_XM_870711.2_    | 618377         | MDK      | midkine (neurite growth-promoting factor 2)                        | Extracellular Space | growth factor | H                               | -3.567    | 0.011       | 1.382      | 0.952          | 1.502         | 0.832          |
| gi_115497151_ref_NM_001076398.1_ | 615855         | NRADD    | neurotrophin receptor associated death domain                      | Extracellular Space | cytokine      | H                               | -3.640    | 0.010       | 1.102      | 1.150          | 1.400         | 1.068          |
| gi_114052742_ref_NM_001045877.1_ | 407216         | BMP4     | bone morphogenetic protein 4                                       | Extracellular Space | growth factor | H                               | -3.758    | 0.009       | 1.575      | 0.505          | 1.952         | 0.181          |
| gi_119909897_ref_XM_869815.2_    | 617538         | IL17C    | interleukin 17C                                                    | Extracellular Space | cytokine      | M                               | -3.811    | 0.008       | 1.455      | 0.743          | 1.847         | 0.254          |
| gi_119892435_ref_XM_595759.3_    | 517587         | INHBE    | inhibin, beta E                                                    | Extracellular Space | growth factor | L                               | -3.836    | 0.008       | 1.076      | 0.918          | 3.535         | 0.001          |
| gi_149643014_ref_NM_001098859.1_ | 407111         | FASLG    | Fas ligand (TNF superfamily, member 6)                             | Extracellular Space | cytokine      | M                               | -4.220    | 0.004       | -2.436     | 0.000          | -2.019        | 0.000          |
| gi_119894894_ref_XM_600015.3_    | 521748         | TNFSF9   | tumor necrosis factor (ligand) superfamily, member 9               | Extracellular Space | cytokine      | H                               | -4.883    | 0.001       | 1.128      | 1.207          | 1.796         | 0.307          |
| gi_134085416_ref_NM_001013401.2_ | 280845         | LTA      | lymphotoxin alpha (TNF superfamily, member 1)                      | Extracellular Space | cytokine      | VH                              | -5.010    | 0.001       | -1.802     | 0.002          | -1.364        | 0.144          |
| gi_114051352_ref_NM_001046182.1_ | 514773         | SOCS5    | suppressor of cytokine signaling 5                                 | Extracellular Space | cytokine      | H                               | -5.138    | 0.001       | 1.341      | 1.104          | 1.326         | 1.180          |
| gi_31342941_ref_NM_174055.2_     | 281160         | FGF1     | fibroblast growth factor 1 (acidic)                                | Extracellular Space | growth factor | M                               | -5.214    | 0.001       | 1.329      | 0.957          | 1.623         | 0.552          |
| gi_119910851_ref_XM_602991.3_    | 524661         | FGF21    | fibroblast growth factor 21                                        | Extracellular Space | growth factor | M                               | -5.561    | 0.000       | 1.345      | 0.929          | 1.701         | 0.415          |
| gi_77735642_ref_NM_001034345.1_  | 509167         | CCL19    | chemokine (C-C motif) ligand 19                                    | Extracellular Space | cytokine      | M                               | -5.654    | 0.000       | 2.513      | 0.005          | 2.938         | 0.006          |
| gi_119923438_ref_XM_615898.3_    | 521961         | VAV3     | vav 3 guanine nucleotide exchange factor                           | Extracellular Space | cytokine      | VH                              | -6.007    | 0.000       | 2.171      | 0.027          | 1.711         | 0.415          |
| gi_119908015_ref_XM_604649.3_    | 526285         | IL24     | interleukin 24                                                     | Extracellular Space | cytokine      | VH                              | -6.127    | 0.000       | 1.169      | 1.100          | 1.042         | 0.915          |
| gi_139948854_ref_NM_001083706.1_ | 525931         | PDGFD    | platelet derived growth factor D                                   | Extracellular Space | growth factor | VH                              | -8.249    | 0.000       | 1.622      | 0.413          | 2.979         | 0.005          |
| gi_119894908_ref_XM_600347.3_    | 522074         | CD70     | CD70 molecule                                                      | Extracellular Space | cytokine      | H                               | -13.147   | 0.000       | 3.857      | 0.000          | 8.446         | 0.000          |
| gi_31342868_ref_NM_174091.2_     | 281249         | IL18     | interleukin 18 (interferon-gamma-inducing factor)                  | Extracellular Space | cytokine      | H                               | -13.668   | 0.000       | 3.652      | 0.000          | 4.042         | 0.000          |
| gi_119904450_ref_XM_591585.3_    | 513836         | TNFSF11  | tumor necrosis factor (ligand) superfamily, member 11              | Extracellular Space | cytokine      | H                               | -22.409   | 0.000       | -1.019     | 0.692          | 1.336         | 1.085          |
| gi_72534795_ref_NM_001031751.1_  | 282879         | HGF      | hepatocyte growth factor (hepapoietin A; scatter factor)           | Extracellular Space | growth factor | H                               | -58.668   | 0.000       | -1.340     | 0.110          | -1.401        | 0.083          |
| gi_41386773_ref_NM_174090.1_     | 281248         | IL15     | interleukin 15                                                     | Extracellular Space | cytokine      | H                               | -60.142   | 0.000       | 1.041      | 1.014          | 1.059         | 1.227          |

**Table S6B: Cell Surface - receptors**

| SEQ_ID                        | Entrez gene ID | Symbol | Entrez Gene Name             | Location        | Type                   | Predicted BL20 expression level | FC        |             |            |                |               |                |
|-------------------------------|----------------|--------|------------------------------|-----------------|------------------------|---------------------------------|-----------|-------------|------------|----------------|---------------|----------------|
|                               |                |        |                              |                 |                        |                                 | FC BLvTBL | FDR BLvsTBL | TBLvTBL24h | FDR TBLvTBL24h | FC TBLvTBL48h | FDR TBLvTBL48h |
| gi_119894051_ref_XM_587301.3_ | 510185         | IL2RB  | interleukin 2 receptor, beta | Plasma Membrane | transmembrane receptor | M                               | 80.276    | 0.000       | 1.023      | 1.141          | 1.072         | 1.277          |

|                                  |           |          |                                                         |                 |                          |    |        |       |        |       |         |       |
|----------------------------------|-----------|----------|---------------------------------------------------------|-----------------|--------------------------|----|--------|-------|--------|-------|---------|-------|
| gi_134085682_ref_NM_001083479.1_ | 534536    | ACVRL1   | activin A receptor type II-like 1                       | Plasma Membrane | kinase                   | L  | 38.543 | 0.000 | -1.041 | 0.905 | -1.068  | 0.869 |
| gi_31342230_ref_NM_174358.2_     | 281861    | IL2RA    | interleukin 2 receptor, alpha                           | Plasma Membrane | transmembrane receptor   | L  | 25.884 | 0.000 | -1.401 | 0.092 | 2.023   | 0.131 |
| gi_31342240_ref_NM_174348.2_     | 281839    | ICAM1    | intercellular adhesion molecule 1                       | Plasma Membrane | transmembrane receptor   | H  | 18.031 | 0.000 | -1.932 | 0.000 | -1.223  | 0.453 |
| gi_119917021_ref_XM_870302.2_    | 617967    | IL21R    | interleukin 21 receptor                                 | Plasma Membrane | transmembrane receptor   | M  | 12.421 | 0.000 | -1.055 | 0.913 | 1.166   | 1.340 |
| gi_166999226_ref_NM_001007810.3_ | 493645    | C5AR1    | complement component 5a receptor 1                      | Plasma Membrane | G-protein coupled recept | H  | 12.023 | 0.000 | -1.514 | 0.029 | 1.006   | 1.122 |
| gi_119893058_ref_XM_868762.2_    | 616674    | CLEC4A   | C-type lectin domain family 4, member A                 | Plasma Membrane | transmembrane receptor   | N  | 10.246 | 0.000 | 3.657  | 0.000 | 1.866   | 0.251 |
| gi_114051118_ref_NM_001046210.1_ | 515700    | IL1R2    | interleukin 1 receptor, type II                         | Plasma Membrane | transmembrane receptor   | L  | 9.818  | 0.000 | 2.911  | 0.001 | 1.608   | 0.590 |
| gi_77735630_ref_NM_001034339.1_  | 508932    | IL11RA   | interleukin 11 receptor, alpha                          | Plasma Membrane | transmembrane receptor   | M  | 8.542  | 0.000 | -1.063 | 0.743 | 1.012   | 1.116 |
| gi_156523227_ref_NM_001102558.1_ | 100124525 | CX3CR1   | chemokine (C-X3-C motif) receptor 1                     | Plasma Membrane | G-protein coupled recept | L  | 8.178  | 0.000 | 55.305 | 0.000 | 137.187 | 0.000 |
| gi_62988287_ref_NM_001017937.1_  | 507837    | BAIAP2   | BAI1-associated protein 2                               | Plasma Membrane | kinase                   | M  | 7.760  | 0.000 | 1.181  | 1.208 | 1.899   | 0.207 |
| gi_31341597_ref_NM_174588.2_     | 282329    | PTGER2   | prostaglandin E receptor 2 (subtype EP2), 53kDa         | Plasma Membrane | G-protein coupled recept | N  | 6.462  | 0.000 | -1.461 | 0.050 | -3.223  | 0.000 |
| gi_89886438_ref_NM_001039726.1_  | 281422    | PRLR     | prolactin receptor                                      | Plasma Membrane | transmembrane receptor   | N  | 6.067  | 0.000 | -2.220 | 0.000 | -4.282  | 0.000 |
| gi_115496689_ref_NM_001075699.1_ | 515172    | P2RY10   | purinergic receptor P2Y, G-protein coupled, 10          | Plasma Membrane | G-protein coupled recept | M  | 5.878  | 0.000 | 1.914  | 0.104 | 1.921   | 0.203 |
| gi_115495646_ref_NM_001075139.1_ | 404058    | KLRK1    | killer cell lectin-like receptor subfamily K, member 1  | Plasma Membrane | transmembrane receptor   | M  | 5.551  | 0.000 | 1.339  | 1.144 | 1.344   | 1.234 |
| gi_119888721_ref_XM_612644.3_    | 540687    | GPR3     | G protein-coupled receptor 3                            | Plasma Membrane | G-protein coupled recept | L  | 4.415  | 0.000 | -3.230 | 0.000 | -5.521  | 0.000 |
| gi_119903179_ref_XM_871776.2_    | 520709    | IL1RL1   | interleukin 1 receptor-like 1                           | Plasma Membrane | transmembrane receptor   | N  | 4.195  | 0.000 | -2.315 | 0.000 | -3.775  | 0.000 |
| gi_76626421_ref_XM_599517.2_     | 521257    | HRH2     | histamine receptor H2                                   | Plasma Membrane | G-protein coupled recept | L  | 4.103  | 0.000 | -1.896 | 0.001 | -1.641  | 0.011 |
| gi_31343037_ref_NM_174014.2_     | 281058    | CD69     | CD69 molecule                                           | Plasma Membrane | transmembrane receptor   | M  | 4.063  | 0.000 | -1.724 | 0.004 | -2.905  | 0.000 |
| gi_119904648_ref_XM_590263.3_    | 512700    | FLT3     | frms-related tyrosine kinase 3                          | Plasma Membrane | kinase                   | H  | 3.727  | 0.000 | 2.044  | 0.055 | 2.633   | 0.014 |
| gi_31342041_ref_NM_174423.2_     | 281983    | PLAUR    | plasminogen activator, urokinase receptor               | Plasma Membrane | transmembrane receptor   | H  | 3.707  | 0.000 | -1.666 | 0.007 | -1.539  | 0.033 |
| gi_31340793_ref_NM_174662.2_     | 282488    | FAS      | Fas (TNF receptor superfamily, member 6)                | Plasma Membrane | transmembrane receptor   | M  | 3.517  | 0.000 | 1.007  | 1.113 | -1.089  | 0.854 |
| gi_119918814_ref_XM_869491.2_    | 445416    | FZD4     | frizzled homolog 4 (Drosophila)                         | Plasma Membrane | G-protein coupled recept | M  | 3.502  | 0.000 | 1.008  | 1.091 | -2.685  | 0.000 |
| gi_119889339_ref_XM_613650.3_    | 353111    | NTRK1    | neurotrophic tyrosine kinase, receptor, type 1          | Plasma Membrane | kinase                   | L  | 3.454  | 0.000 | -1.281 | 0.224 | -2.685  | 0.000 |
| gi_119889854_ref_XM_001253071.1_ | 784894    | TGFBR3   | transforming growth factor, beta receptor III           | Plasma Membrane | kinase                   | L  | 3.377  | 0.000 | 5.319  | 0.000 | 10.447  | 0.000 |
| gi_119912530_ref_XM_607489.3_    | 529049    | MRC2     | mannose receptor, C type 2                              | Plasma Membrane | transmembrane receptor   | M  | 3.353  | 0.000 | -2.126 | 0.000 | 1.743   | 0.369 |
| gi_31342610_ref_NM_174197.2_     | 281534    | TLR2     | tolllike receptor 2                                     | Plasma Membrane | transmembrane receptor   | M  | 3.246  | 0.000 | 2.619  | 0.004 | 2.615   | 0.015 |
| gi_118150987_ref_NM_001077947.1_ | 522144    | GPR77    | G protein-coupled receptor 77                           | Plasma Membrane | G-protein coupled recept | L  | 3.184  | 0.000 | 1.331  | 0.898 | -1.010  | 0.692 |
| gi_94966784_ref_NM_001040490.1_  | 338033    | TNFRSF1B | tumor necrosis factor receptor superfamily, member 1E   | Plasma Membrane | transmembrane receptor   | VH | 3.062  | 0.000 | -1.794 | 0.002 | -1.251  | 0.367 |
| gi_119914227_ref_XM_585197.3_    | 539146    | GPR132   | G protein-coupled receptor 132                          | Plasma Membrane | G-protein coupled recept | H  | 3.039  | 0.000 | -1.007 | 1.028 | 1.153   | 1.330 |
| gi_28603783_ref_NM_176661.1_     | 338066    | CD97     | CD97 molecule                                           | Plasma Membrane | G-protein coupled recept | H  | 3.000  | 0.000 | -1.033 | 0.930 | 1.015   | 1.173 |
| gi_139948963_ref_NM_001083752.1_ | 540702    | C3AR1    | complement component 3a receptor 1                      | Plasma Membrane | G-protein coupled recept | N  | 2.761  | 0.000 | 1.144  | 1.214 | 1.811   | 0.291 |
| gi_76608734_ref_XM_582381.2_     | 538740    | GPR15    | G protein-coupled receptor 15                           | Plasma Membrane | G-protein coupled recept | L  | 2.612  | 0.000 | 4.919  | 0.000 | 11.340  | 0.000 |
| gi_110350680_ref_NM_001011676.2_ | 497022    | CD2      | CD2 molecule                                            | Plasma Membrane | transmembrane receptor   | L  | 2.588  | 0.000 | 2.912  | 0.000 | 4.218   | 0.000 |
| gi_119903192_ref_XM_590497.3_    | 407221    | IL18R1   | interleukin 18 receptor 1                               | Plasma Membrane | transmembrane receptor   | L  | 2.478  | 0.000 | -2.446 | 0.000 | -2.324  | 0.000 |
| gi_119907079_ref_XM_591164.3_    | 513478    | IL10RA   | interleukin 10 receptor, alpha                          | Plasma Membrane | transmembrane receptor   | M  | 2.429  | 0.000 | -1.112 | 0.602 | 1.218   | 1.302 |
| gi_119893892_ref_XM_612028.3_    | 280832    | KIT      | v-kit Hardy-Zuckerman 4 feline sarcoma viral oncogen    | Plasma Membrane | kinase                   | N  | 2.351  | 0.000 | 1.445  | 0.720 | 6.956   | 0.000 |
| gi_119892995_ref_XM_607058.3_    | 536328    | LRP6     | low density lipoprotein receptor-related protein 6      | Plasma Membrane | transmembrane receptor   | L  | 2.267  | 0.000 | -1.015 | 0.969 | -1.091  | 0.758 |
| gi_119925169_ref_XM_594146.3_    | 444870    | TLR5     | tolllike receptor 5                                     | Plasma Membrane | transmembrane receptor   | L  | 2.242  | 0.000 | 1.485  | 0.689 | -1.003  | 1.020 |
| gi_27806448_ref_NM_174162.1_     | 281439    | DAG1     | dystroglycan 1 (dystrophin-associated glycoprotein 1)   | Plasma Membrane | transmembrane receptor   | H  | 2.210  | 0.000 | -1.750 | 0.004 | -1.143  | 0.703 |
| gi_117935052_ref_NM_001024930.2_ | 510668    | CCR7     | chemokine (C-C motif) receptor 7                        | Plasma Membrane | G-protein coupled recept | VH | 2.134  | 0.000 | -1.981 | 0.000 | -1.794  | 0.004 |
| gi_119903186_ref_XM_593695.3_    | 515640    | IL1R1    | interleukin 1 receptor, type I                          | Plasma Membrane | transmembrane receptor   | VH | 2.074  | 0.000 | 1.074  | 1.201 | 1.104   | 1.315 |
| gi_114052594_ref_NM_001046316.1_ | 531137    | LGALS3BP | lectin, galactoside-binding, soluble, 3 binding protein | Plasma Membrane | transmembrane receptor   | VH | 2.049  | 0.001 | 1.165  | 1.246 | 1.209   | 1.340 |
| gi_119895013_ref_XM_587940.3_    | 539534    | S1PR4    | sphingosine-1-phosphate receptor 4                      | Plasma Membrane | G-protein coupled recept | L  | 2.017  | 0.001 | -1.238 | 0.199 | -3.049  | 0.000 |
| gi_119912855_ref_XM_603404.3_    | 525061    | CD300C   | CD300c molecule                                         | Plasma Membrane | transmembrane receptor   | M  | 1.980  | 0.001 | -1.071 | 0.757 | 1.049   | 1.123 |
| gi_119879744_ref_XM_613645.3_    | 540907    | EPHB3    | EPH receptor B3                                         | Plasma Membrane | kinase                   | L  | 1.944  | 0.001 | -1.247 | 0.346 | -1.220  | 0.420 |
| gi_119902362_ref_XM_001253886.1_ | 788224    | TYRO3    | TYRO3 protein tyrosine kinase                           | Plasma Membrane | kinase                   | M  | 1.827  | 0.002 | 1.304  | 1.066 | -1.087  | 0.741 |
| gi_119894537_ref_XM_602621.3_    | 524299    | IL12RB1  | interleukin 12 receptor, beta 1                         | Plasma Membrane | transmembrane receptor   | L  | 1.807  | 0.002 | -2.010 | 0.000 | -2.047  | 0.000 |
| gi_119915419_ref_XM_001255620.1_ | 788613    | MICB     | MHC class I polypeptide-related sequence B              | Plasma Membrane | transmembrane receptor   | L  | 1.803  | 0.003 | -2.747 | 0.000 | -1.894  | 0.002 |
| gi_119890635_ref_XM_581281.3_    | 505056    | GPR35    | G protein-coupled receptor 35                           | Plasma Membrane | G-protein coupled recept | M  | 1.802  | 0.002 | 1.797  | 0.183 | 2.359   | 0.038 |
| gi_77736420_ref_NM_001034738.1_  | 613482    | LTBR4    | leukotriene B4 receptor                                 | Plasma Membrane | G-protein coupled recept | H  | 1.771  | 0.002 | -2.302 | 0.000 | -1.560  | 0.024 |
| gi_149642840_ref_NM_001099043.1_ | 528782    | TNFRSF4  | tumor necrosis factor receptor superfamily, member 4    | Plasma Membrane | transmembrane receptor   | M  | 1.760  | 0.003 | -3.008 | 0.000 | -1.701  | 0.006 |
| gi_119914870_ref_XR_027440.1_    | 781625    | PLXND1   | plexin D1                                               | Plasma Membrane | transmembrane receptor   | H  | 1.740  | 0.003 | -1.541 | 0.023 | -1.449  | 0.068 |
| gi_27806206_ref_NM_174499.1_     | 282135    | ADRA2A   | adrenergic, alpha-2A-, receptor                         | Plasma Membrane | G-protein coupled recept | L  | 1.724  | 0.006 | -1.908 | 0.000 | -1.879  | 0.002 |
| gi_119888952_ref_XM_590380.3_    | 512798    | EPHA2    | EPH receptor A2                                         | Plasma Membrane | kinase                   | M  | 1.718  | 0.005 | -1.305 | 0.194 | -1.120  | 0.658 |
| gi_147898888_ref_NM_001098163.1_ | 100036590 | KLRC1    | killer cell lectin-like receptor subfamily C, member 1  | Plasma Membrane | transmembrane receptor   | N  | 1.654  | 0.007 | -1.067 | 0.369 | -1.611  | 0.011 |
| gi_119923923_ref_XM_001249398.1_ | 781056    | GPR174   | G protein-coupled receptor 174                          | Plasma Membrane | G-protein coupled recept | H  | 1.623  | 0.005 | -1.400 | 0.092 | -1.927  | 0.001 |
| gi_94966908_ref_NM_001040554.1_  | 782684    | HLA-A    | major histocompatibility complex, class I, A            | Plasma Membrane | transmembrane receptor   | H  | 1.608  | 0.007 | -1.020 | 0.852 | -1.108  | 0.577 |
| gi_114051336_ref_NM_001046183.1_ | 514832    | PEX5     | peroxisomal biogenesis factor 5                         | Cytoplasm       | transmembrane receptor   | H  | 1.589  | 0.006 | -1.236 | 0.400 | -1.116  | 0.776 |
| gi_119893717_ref_XM_614752.3_    | 541147    | GPR125   | G protein-coupled receptor 125                          | Plasma Membrane | G-protein coupled recept | VH | 1.576  | 0.009 | 1.167  | 1.248 | 1.078   | 1.259 |
| gi_139949072_ref_NM_001083656.1_ | 509703    | GPR56    | G protein-coupled receptor 56                           | Plasma Membrane | G-protein coupled recept | L  | 1.574  | 0.010 | 1.261  | 1.233 | 1.155   | 1.313 |
| gi_77736382_ref_NM_001034655.1_  | 538903    | SIGMAR1  | sigma non-opioid intracellular receptor 1               | Plasma Membrane | G-protein coupled recept | VH | 1.542  | 0.009 | -1.172 | 0.560 | -1.668  | 0.010 |
| gi_31341778_ref_NM_174516.2_     | 282179    | CHRNB1   | cholinergic receptor, nicotinic, beta 1 (muscle)        | Plasma Membrane | transmembrane receptor   | H  | 1.522  | 0.011 | -1.761 | 0.002 | -1.767  | 0.005 |
| gi_119903188_ref_XM_600388.3_    | 522114    | IL1RL2   | interleukin 1 receptor-like 2                           | Plasma Membrane | transmembrane receptor   | L  | 1.519  | 0.019 | 1.334  | 0.847 | 1.619   | 0.438 |
| gi_155372282_ref_NM_001101284.1_ | 782518    | LPAR6    | lysophosphatidic acid receptor 6                        | Plasma Membrane | G-protein coupled recept | L  | 1.483  | 0.018 | -1.242 | 0.311 | 1.628   | 0.530 |
| gi_119889654_ref_XM_618390.3_    | 538194    | CELSR2   | cadherin, EGF LAG seven-pass G-type receptor 2 (flai    | Plasma Membrane | G-protein coupled recept | H  | 1.465  | 0.022 | -3.904 | 0.000 | -1.117  | 0.682 |
| gi_119894271_ref_XM_610839.3_    | 532327    | FGFRL1   | fibroblast growth factor receptor-like 1                | Plasma Membrane | transmembrane receptor   | M  | 1.454  | 0.023 | -1.387 | 0.096 | -1.318  | 0.208 |

|                                  |           |                     |                                                              |                 |                          |    |        |       |        |       |        |       |
|----------------------------------|-----------|---------------------|--------------------------------------------------------------|-----------------|--------------------------|----|--------|-------|--------|-------|--------|-------|
| gi_156120416_ref_NM_001101884.1_ | 507427    | RIPK3               | receptor-interacting serine-threonine kinase 3               | Plasma Membrane | kinase                   | H  | 1.438  | 0.021 | 1.224  | 1.253 | 1.643  | 0.537 |
| gi_31342195_ref_NM_174368.2_     | 281876    | ITGB1               | integrin, beta 1 (fibronectin receptor, beta polypeptide)    | Plasma Membrane | transmembrane receptor   | VH | 1.414  | 0.025 | 1.010  | 1.116 | 1.139  | 1.330 |
| gi_119920696_ref_XM_608251.3_    | 529792    | CRLF2               | cytokine receptor-like factor 2                              | Plasma Membrane | transmembrane receptor   | L  | 1.395  | 0.046 | 1.273  | 1.211 | -1.493 | 0.037 |
| gi_78045494_ref_NM_001035048.1_  | 507439    | NMUR2               | neurexin U receptor 2                                        | Plasma Membrane | G-protein coupled recept | L  | 1.359  | 0.048 | 1.751  | 0.164 | -1.040 | 0.611 |
| gi_155372320_ref_NM_001101303.1_ | 788507    | GPR65               | G protein-coupled receptor 65                                | Plasma Membrane | G-protein coupled recept | VH | 1.357  | 0.038 | 1.381  | 1.031 | -1.122 | 0.724 |
| gi_31341841_ref_NM_174495.2_     | 282131    | ACVR2B              | activin A receptor, type IIb                                 | Plasma Membrane | kinase                   | H  | 1.341  | 0.047 | -1.047 | 0.939 | 1.488  | 0.865 |
| gi_119894606_ref_XM_588006.3_    | 510803    | PGLYRP2             | peptidoglycan recognition protein 2                          | Plasma Membrane | transmembrane receptor   | L  | 1.326  | 0.054 | -1.116 | 0.610 | -1.564 | 0.018 |
| gi_119910893_ref_XM_582800.3_    | 506364    | SIGLEC8             | sialic acid binding Ig-like lectin 8                         | Plasma Membrane | transmembrane receptor   | L  | -2.953 | 0.054 | 1.368  | 0.967 | 1.432  | 0.983 |
| gi_147900316_ref_NM_001098123.1_ | 541056    | GRM3                | glutamate receptor, metabotropic 3                           | Plasma Membrane | G-protein coupled recept | M  | -2.985 | 0.050 | 2.766  | 0.002 | 3.379  | 0.002 |
| gi_31341426_ref_NM_173878.2_     | 280686    | F3                  | coagulation factor III (thromboplastin, tissue factor)       | Plasma Membrane | transmembrane receptor   | M  | -3.014 | 0.048 | 2.364  | 0.010 | 2.742  | 0.010 |
| gi_31342593_ref_NM_174206.2_     | 281553    | TSHR                | thyroid stimulating hormone receptor                         | Plasma Membrane | G-protein coupled recept | L  | -3.063 | 0.047 | -1.041 | 0.743 | 1.092  | 1.152 |
| gi_110347601_ref_NM_001040481.2_ | 282491    | HLA-DMB             | major histocompatibility complex, class II, DM beta          | Plasma Membrane | transmembrane receptor   | VH | -3.219 | 0.027 | 1.329  | 1.142 | -1.026 | 0.995 |
| gi_119890574_ref_XM_871140.2_    | 618817    | OR6B2               | olfactory receptor, family 6, subfamily B, member 2          | Plasma Membrane | G-protein coupled recept | L  | -3.255 | 0.029 | 1.799  | 0.152 | 2.068  | 0.115 |
| gi_119920926_ref_XM_586199.3_    | 509267    | GM6495              | predicted gene 6495                                          | Plasma Membrane | G-protein coupled recept | M  | -3.279 | 0.023 | 1.337  | 1.126 | 1.464  | 0.939 |
| gi_156121074_ref_NM_001102214.1_ | 538495    | ILDR1               | immunoglobulin-like domain containing receptor 1             | Plasma Membrane | transmembrane receptor   | L  | -3.299 | 0.025 | 1.098  | 1.153 | 1.805  | 0.301 |
| gi_76677886_ref_NM_001033937.1_  | 532262    | TLR8 (includes EG:) | toll-like receptor 8                                         | Plasma Membrane | transmembrane receptor   | L  | -3.302 | 0.025 | 1.069  | 1.104 | 1.207  | 1.319 |
| gi_73853749_ref_NM_174011.3_     | 281054    | CD3E                | CD3e molecule, epsilon (CD3-TCR complex)                     | Plasma Membrane | transmembrane receptor   | M  | -3.312 | 0.025 | 1.175  | 1.235 | -1.225 | 0.418 |
| gi_119901592_ref_XR_027451.1_    | 534358    | UTRN                | utrophin                                                     | Plasma Membrane | transmembrane receptor   | VH | -3.333 | 0.021 | 1.618  | 0.387 | 2.313  | 0.044 |
| gi_119910556_ref_XM_594754.3_    | 516598    | AXL                 | AXL receptor tyrosine kinase                                 | Plasma Membrane | kinase                   | L  | -3.363 | 0.025 | 1.330  | 1.135 | 1.682  | 0.467 |
| gi_119895312_ref_XM_866364.2_    | 614762    | OR2G3               | olfactory receptor, family 2, subfamily G, member 3          | Plasma Membrane | G-protein coupled recept | L  | -3.432 | 0.019 | 1.295  | 0.985 | 1.625  | 0.539 |
| gi_76669265_ref_XM_590306.2_     | 512736    | OR52J3              | olfactory receptor, family 52, subfamily J, member 3         | Plasma Membrane | G-protein coupled recept | L  | -3.464 | 0.015 | 1.468  | 0.740 | 2.520  | 0.021 |
| gi_119914827_ref_XM_589282.3_    | 408018    | CCR3                | chemokine (C-C motif) receptor 3                             | Plasma Membrane | G-protein coupled recept | H  | -3.492 | 0.016 | -1.997 | 0.000 | -1.834 | 0.002 |
| gi_148277667_ref_NM_174547.2_    | 282244    | GUCY2C              | guanylate cyclase 2C (heat stable enterotoxin receptor)      | Plasma Membrane | kinase                   | L  | -3.620 | 0.012 | 1.259  | 1.210 | 1.214  | 1.306 |
| gi_158819080_ref_NM_001110191.1_ | 100126272 | CD302               | CD302 molecule                                               | Plasma Membrane | transmembrane receptor   | H  | -3.631 | 0.010 | 2.071  | 0.048 | 1.437  | 0.966 |
| gi_119879508_ref_XM_617543.3_    | 407131    | CD80                | CD80 molecule                                                | Plasma Membrane | transmembrane receptor   | H  | -3.651 | 0.010 | 2.625  | 0.004 | 3.352  | 0.002 |
| gi_119921029_ref_NM_001252156.1_ | 783597    | OLFR617             | olfactory receptor 617                                       | Plasma Membrane | G-protein coupled recept | L  | -3.671 | 0.013 | 3.389  | 0.000 | 12.014 | 0.000 |
| gi_34147166_ref_NM_183081.1_     | 282602    | TLR9                | toll-like receptor 9                                         | Plasma Membrane | transmembrane receptor   | H  | -3.686 | 0.009 | 2.333  | 0.012 | 3.138  | 0.003 |
| gi_76657295_ref_XM_869298.1_     | 617108    | OLFR890             | olfactory receptor 890                                       | Plasma Membrane | G-protein coupled recept | L  | -3.760 | 0.010 | 2.601  | 0.004 | 4.413  | 0.000 |
| gi_119902238_ref_XM_866698.2_    | 615014    | OLFR49              | olfactory receptor 49                                        | Plasma Membrane | G-protein coupled recept | M  | -3.788 | 0.009 | 2.040  | 0.053 | 2.609  | 0.016 |
| gi_119926223_ref_XM_588414.2_    | 539623    | OR2J2               | olfactory receptor, family 2, subfamily J, member 2          | Plasma Membrane | G-protein coupled recept | M  | -3.794 | 0.007 | 2.277  | 0.015 | 3.038  | 0.005 |
| gi_164448559_ref_NM_174266.3_    | 281674    | CD79A               | CD79a molecule, immunoglobulin-associated alpha              | Plasma Membrane | transmembrane receptor   | VH | -3.830 | 0.006 | 1.533  | 0.605 | 1.975  | 0.163 |
| gi_31341726_ref_NM_174539.2_     | 282229    | FCGR2B              | Fc fragment of IgG, low affinity IIb, receptor (CD32)        | Plasma Membrane | transmembrane receptor   | H  | -3.841 | 0.006 | 3.525  | 0.000 | 6.007  | 0.000 |
| gi_187937198_ref_NM_001127317.1_ | 533051    | MICB                | MHC class I polypeptide-related sequence B                   | Plasma Membrane | transmembrane receptor   | VH | -3.961 | 0.005 | 2.154  | 0.030 | 3.242  | 0.003 |
| gi_119924734_ref_XM_001251058.1_ | 782431    | OR2W1               | olfactory receptor, family 2, subfamily W, member 1          | Plasma Membrane | G-protein coupled recept | M  | -3.970 | 0.005 | 1.464  | 0.630 | 2.400  | 0.032 |
| gi_119915533_ref_XM_001251657.1_ | 783002    | OR2B2               | olfactory receptor, family 2, subfamily B, member 2          | Plasma Membrane | G-protein coupled recept | M  | -3.984 | 0.006 | 3.159  | 0.000 | 2.918  | 0.007 |
| gi_119913108_ref_XM_600430.3_    | 522155    | IL6ST               | interleukin 6 signal transducer (gp130, oncostatin re        | Plasma Membrane | transmembrane receptor   | H  | -4.092 | 0.004 | 1.783  | 0.203 | 1.514  | 0.800 |
| gi_119912528_ref_XM_616376.3_    | 282642    | ITGB3               | integrin, beta 3 (platelet glycoprotein IIIa, antigen CD6    | Plasma Membrane | transmembrane receptor   | L  | -4.099 | 0.004 | 1.910  | 0.095 | 2.263  | 0.054 |
| gi_154152062_ref_NM_001100304.1_ | 506159    | GPR52               | G protein-coupled receptor 52                                | Plasma Membrane | G-protein coupled recept | L  | -4.119 | 0.005 | 2.269  | 0.016 | 1.907  | 0.207 |
| gi_119915602_ref_XM_001253092.1_ | 784917    | OLFR129             | olfactory receptor 129                                       | Plasma Membrane | G-protein coupled recept | M  | -4.215 | 0.004 | 1.790  | 0.196 | 2.376  | 0.036 |
| gi_99028970_ref_NM_001012674.2_  | 282490    | HLA-DMA             | major histocompatibility complex, class II, DM alpha         | Plasma Membrane | transmembrane receptor   | VH | -4.249 | 0.003 | 1.216  | 1.257 | 1.062  | 1.238 |
| gi_119900522_ref_XM_001251357.1_ | 783725    | CD72                | CD72 molecule                                                | Plasma Membrane | transmembrane receptor   | H  | -4.306 | 0.003 | 2.136  | 0.034 | 2.555  | 0.019 |
| gi_119910464_ref_XM_605910.3_    | 527517    | FFAR3               | free fatty acid receptor 3                                   | Plasma Membrane | G-protein coupled recept | M  | -4.411 | 0.004 | 1.164  | 1.055 | 1.036  | 0.872 |
| gi_116004060_ref_NM_001076918.1_ | 539791    | TLR10               | toll-like receptor 10                                        | Plasma Membrane | transmembrane receptor   | L  | -4.414 | 0.003 | 1.198  | 1.235 | 2.227  | 0.061 |
| gi_119911318_ref_XM_001256784.1_ | 790265    | VN1R1               | vomerolnasal 1 receptor 1                                    | Plasma Membrane | G-protein coupled recept | L  | -4.618 | 0.003 | 1.320  | 1.077 | 1.743  | 0.350 |
| gi_119893047_ref_XM_613380.3_    | 533844    | CD163               | CD163 molecule                                               | Plasma Membrane | transmembrane receptor   | M  | -4.650 | 0.002 | 4.651  | 0.000 | 17.050 | 0.000 |
| gi_62460553_ref_NM_001014929.1_  | 515011    | ITGA2B (includes E  | integrin, alpha 2b (platelet glycoprotein IIb of IIb/IIIa co | Plasma Membrane | transmembrane receptor   | H  | -4.680 | 0.002 | 2.023  | 0.054 | 9.254  | 0.000 |
| gi_58332431_ref_NM_178317.3_     | 352960    | TRIB2               | tribbles homolog 2 (Drosophila)                              | Plasma Membrane | kinase                   | VH | -4.720 | 0.002 | -1.246 | 0.367 | 1.021  | 1.161 |
| gi_119895827_ref_XM_001250068.1_ | 407140    | ADRA1B              | adrenergic, alpha-1B-, receptor                              | Plasma Membrane | G-protein coupled recept | H  | -4.784 | 0.001 | 1.937  | 0.078 | 2.770  | 0.009 |
| gi_119911392_ref_XM_601098.3_    | 522810    | TEX14               | testis expressed 14                                          | Plasma Membrane | kinase                   | M  | -4.846 | 0.001 | 1.727  | 0.224 | 2.126  | 0.089 |
| gi_119907588_ref_XM_588870.3_    | 539703    | P2RY6               | pyrimidinergic receptor P2Y, G-protein coupled, 6            | Plasma Membrane | G-protein coupled recept | M  | -4.904 | 0.001 | 2.032  | 0.055 | 2.966  | 0.006 |
| gi_155372148_ref_NM_001101214.1_ | 540647    | GPR19               | G protein-coupled receptor 19                                | Plasma Membrane | G-protein coupled recept | H  | -5.050 | 0.001 | 1.682  | 0.297 | 1.303  | 1.253 |
| gi_77735560_ref_NM_001034304.1_  | 507598    | LPAR5               | lysophosphatidic acid receptor 5                             | Plasma Membrane | G-protein coupled recept | H  | -5.371 | 0.001 | 5.882  | 0.000 | 7.336  | 0.000 |
| gi_119919670_ref_XM_592079.3_    | 540179    | GPC4                | glypican 4                                                   | Plasma Membrane | transmembrane receptor   | M  | -5.458 | 0.001 | -1.155 | 0.470 | 1.267  | 1.285 |
| gi_41386730_ref_NM_176657.1_     | 338062    | FCGRT               | Fc fragment of IgG, receptor, transporter, alpha             | Plasma Membrane | transmembrane receptor   | H  | -5.615 | 0.000 | 2.746  | 0.002 | 3.519  | 0.001 |
| gi_119919105_ref_XM_001254753.1_ | 337885    | GPR44               | G protein-coupled receptor 44                                | Plasma Membrane | G-protein coupled recept | M  | -5.669 | 0.000 | 1.542  | 0.367 | 1.446  | 0.906 |
| gi_119915616_ref_XM_870400.2_    | 618070    | OLFR131             | olfactory receptor 131                                       | Plasma Membrane | G-protein coupled recept | M  | -5.819 | 0.000 | 1.628  | 0.402 | 4.000  | 0.000 |
| gi_148223508_ref_NM_001098056.1_ | 523822    | TNFRSF11B           | tumor necrosis factor receptor superfamily, member 11        | Plasma Membrane | transmembrane receptor   | M  | -5.852 | 0.000 | 1.562  | 0.461 | 1.398  | 1.033 |
| gi_115497649_ref_NM_001075583.1_ | 512876    | GPR4                | G protein-coupled receptor 4                                 | Plasma Membrane | G-protein coupled recept | M  | -6.134 | 0.000 | 2.102  | 0.036 | 4.322  | 0.000 |
| gi_31343523_ref_NM_175776.2_     | 281033    | TSP0                | translocator protein (18kDa)                                 | Cytoplasm       | transmembrane receptor   | H  | -6.284 | 0.000 | 1.025  | 1.049 | 1.986  | 0.155 |
| gi_95147663_ref_NM_001040472.1_  | 281055    | CD3G                | CD3g molecule, gamma (CD3-TCR complex)                       | Plasma Membrane | transmembrane receptor   | VH | -6.452 | 0.000 | 2.617  | 0.004 | 3.186  | 0.003 |
| gi_119915382_ref_XM_582099.3_    | 538700    | HLA-DRB5            | major histocompatibility complex, class II, DR beta 5        | Plasma Membrane | transmembrane receptor   | H  | -6.499 | 0.000 | 1.262  | 1.251 | 1.364  | 1.171 |
| gi_119913259_ref_XM_599818.3_    | 521554    | IL7R                | interleukin 7 receptor                                       | Plasma Membrane | transmembrane receptor   | H  | -6.767 | 0.000 | 1.198  | 1.256 | -1.113 | 0.687 |
| gi_118150797_ref_NM_001077839.1_ | 407771    | CCR1                | chemokine (C-C motif) receptor 1                             | Plasma Membrane | G-protein coupled recept | H  | -6.915 | 0.000 | 1.057  | 1.118 | 1.002  | 0.971 |
| gi_119921486_ref_XM_582624.3_    | 506206    | MR1                 | major histocompatibility complex, class I-related            | Plasma Membrane | transmembrane receptor   | H  | -7.033 | 0.000 | 3.997  | 0.000 | 5.540  | 0.000 |
| gi_31341591_ref_NM_174589.2_     | 282331    | PTGER4              | prostaglandin E receptor 4 (subtype EP4)                     | Plasma Membrane | G-protein coupled recept | H  | -7.034 | 0.000 | 1.555  | 0.532 | 1.932  | 0.187 |
| gi_115494923_ref_NM_001075952.1_ | 531519    | ASGR2               | asialoglycoprotein receptor 2                                | Plasma Membrane | transmembrane receptor   | H  | -7.502 | 0.000 | 1.712  | 0.285 | 3.466  | 0.001 |

|                                  |        |           |                                                             |                 |                          |    |          |       |        |       |        |       |
|----------------------------------|--------|-----------|-------------------------------------------------------------|-----------------|--------------------------|----|----------|-------|--------|-------|--------|-------|
| gi_164448623_ref_NM_001034564.2_ | 528174 | GPR133    | G protein-coupled receptor 133                              | Plasma Membrane | G-protein coupled recept | M  | -7.570   | 0.000 | -1.216 | 0.318 | 1.014  | 1.051 |
| gi_76628635_ref_XM_594575.2_     | 516422 | ADRA2B    | adrenergic, alpha-2B-, receptor                             | Plasma Membrane | G-protein coupled recept | M  | -8.283   | 0.000 | 1.639  | 0.295 | 2.255  | 0.055 |
| gi_119891802_ref_XM_598424.3_    | 520189 | LGR5      | leucine-rich repeat-containing G protein-coupled receptor   | Plasma Membrane | G-protein coupled recept | H  | -8.580   | 0.000 | 1.119  | 1.203 | -3.245 | 0.000 |
| gi_77736322_ref_NM_001034689.1_  | 540038 | GPR18     | G protein-coupled receptor 18                               | Plasma Membrane | G-protein coupled recept | H  | -8.868   | 0.000 | 2.327  | 0.013 | 1.879  | 0.227 |
| gi_76253706_ref_NM_174301.3_     | 281736 | CXCR4     | chemokine (C-X-C motif) receptor 4                          | Plasma Membrane | G-protein coupled recept | VH | -9.677   | 0.000 | 4.072  | 0.000 | 3.127  | 0.004 |
| gi_119894939_ref_XM_582663.3_    | 538783 | TBXA2R    | thromboxane A2 receptor                                     | Plasma Membrane | G-protein coupled recept | VH | -10.482  | 0.000 | 2.146  | 0.031 | 2.757  | 0.010 |
| gi_47564061_ref_NM_001001159.1_  | 407237 | TLR6      | tolllike receptor 6                                         | Plasma Membrane | transmembrane receptor   | H  | -10.744  | 0.000 | 2.641  | 0.003 | 4.438  | 0.000 |
| gi_119917945_ref_XM_596577.3_    | 518385 | GPR123    | G protein-coupled receptor 123                              | Plasma Membrane | G-protein coupled recept | M  | -11.584  | 0.000 | 1.007  | 0.958 | -1.014 | 0.715 |
| gi_119915062_ref_XM_604082.3_    | 525727 | HLA-DOA   | major histocompatibility complex, class II, DO alpha        | Plasma Membrane | transmembrane receptor   | VH | -11.787  | 0.000 | 2.613  | 0.004 | 2.799  | 0.009 |
| gi_119892797_ref_XM_606956.3_    | 528530 | CSF2RB    | colony stimulating factor 2 receptor, beta, low-affinity (t | Plasma Membrane | transmembrane receptor   | H  | -12.824  | 0.000 | 5.807  | 0.000 | 17.980 | 0.000 |
| gi_119915324_ref_XM_590184.3_    | 512637 | GPR110    | G protein-coupled receptor 110                              | Plasma Membrane | G-protein coupled recept | M  | -13.880  | 0.000 | 1.227  | 1.257 | 1.220  | 1.343 |
| gi_31341725_ref_NM_174538.2_     | 282227 | FCGR1A    | Fc fragment of IgG, high affinity Ia, receptor (CD64)       | Plasma Membrane | transmembrane receptor   | H  | -15.082  | 0.000 | 8.087  | 0.000 | 14.337 | 0.000 |
| gi_157427855_ref_NM_001105365.1_ | 514031 | ITGB7     | integrin, beta 7                                            | Plasma Membrane | transmembrane receptor   | H  | -15.582  | 0.000 | 6.285  | 0.000 | 26.661 | 0.000 |
| gi_84370178_ref_NM_001038568.1_  | 540044 | GPR84     | G protein-coupled receptor 84                               | Plasma Membrane | G-protein coupled recept | H  | -17.628  | 0.000 | 10.342 | 0.000 | 20.487 | 0.000 |
| gi_119901378_ref_XM_611161.3_    | 538797 | EPHA7     | EPH receptor A7                                             | Plasma Membrane | kinase                   | H  | -18.744  | 0.000 | 1.512  | 0.525 | 1.697  | 0.393 |
| gi_119914848_ref_XM_584158.3_    | 539002 | CCR2      | chemokine (C-C motif) receptor 2                            | Plasma Membrane | G-protein coupled recept | H  | -19.856  | 0.000 | 1.142  | 1.233 | 1.064  | 1.236 |
| gi_119915290_ref_XM_864510.2_    | 514819 | PTK7      | PTK7 protein tyrosine kinase 7                              | Plasma Membrane | kinase                   | H  | -22.433  | 0.000 | 1.708  | 0.205 | 6.498  | 0.000 |
| gi_119903128_ref_XM_580552.3_    | 504429 | MERTK     | c-mer proto-oncogene tyrosine kinase                        | Plasma Membrane | kinase                   | VH | -24.859  | 0.000 | 1.335  | 1.057 | 1.143  | 1.276 |
| gi_156120860_ref_NM_001102107.1_ | 527140 | CALCR     | calitonin receptor-like                                     | Plasma Membrane | G-protein coupled recept | H  | -26.115  | 0.000 | 1.848  | 0.135 | 2.121  | 0.084 |
| gi_31342075_ref_NM_174410.2_     | 281963 | P2RY1     | purinergic receptor P2Y, G-protein coupled, 1               | Plasma Membrane | G-protein coupled recept | H  | -37.328  | 0.000 | 3.886  | 0.000 | 3.873  | 0.001 |
| gi_114052616_ref_NM_001046504.1_ | 574090 | TLR1      | tolllike receptor 1                                         | Plasma Membrane | transmembrane receptor   | VH | -38.763  | 0.000 | 4.670  | 0.000 | 21.531 | 0.000 |
| gi_76638859_ref_NM_582510.2_     | 538759 | GPR81     | G protein-coupled receptor 81                               | Plasma Membrane | G-protein coupled recept | H  | -42.492  | 0.000 | -1.064 | 0.732 | -1.008 | 0.896 |
| gi_119893274_ref_XM_870848.2_    | 618516 | TNFRSF13C | tumor necrosis factor receptor superfamily, member 13       | Plasma Membrane | transmembrane receptor   | VH | -49.962  | 0.000 | -1.017 | 0.953 | 1.979  | 0.161 |
| gi_119912116_ref_XM_584605.3_    | 353110 | NGFR      | nerve growth factor receptor (TNFR superfamily, mem1        | Plasma Membrane | transmembrane receptor   | VH | -50.012  | 0.000 | -1.285 | 0.254 | -1.112 | 0.644 |
| gi_89886135_ref_NM_001013585.3_  | 281135 | S1PR1     | sphingosine-1-phosphate receptor 1                          | Plasma Membrane | G-protein coupled recept | VH | -58.987  | 0.000 | 4.088  | 0.000 | 13.674 | 0.000 |
| gi_61825106_ref_XM_583123.1_     | 538837 | GPR141    | G protein-coupled receptor 141                              | Plasma Membrane | G-protein coupled recept | H  | -59.180  | 0.000 | 1.317  | 1.100 | 2.078  | 0.112 |
| gi_126723186_ref_NM_174198.6_    | 281536 | TLR4      | tolllike receptor 4                                         | Plasma Membrane | transmembrane receptor   | VH | -70.557  | 0.000 | 4.771  | 0.000 | 4.846  | 0.000 |
| gi_99028960_ref_NM_174184.3_     | 281489 | SLAMF1    | signaling lymphocytic activation molecule family memb       | Plasma Membrane | transmembrane receptor   | VH | -84.352  | 0.000 | 1.301  | 1.106 | 1.326  | 1.182 |
| gi_157427947_ref_NM_001105411.1_ | 534801 | GFRA1     | GDNF family receptor alpha 1                                | Plasma Membrane | transmembrane receptor   | VH | -99.175  | 0.000 | 1.884  | 0.106 | 4.459  | 0.000 |
| gi_119913552_ref_NM_606794.3_    | 281848 | IGF1R     | insulin-like growth factor 1 receptor                       | Plasma Membrane | transmembrane receptor   | VH | -107.774 | 0.000 | 1.943  | 0.061 | 1.866  | 0.190 |
| gi_76660614_ref_XM_597941.2_     | 519716 | CCR6      | chemokine (C-C motif) receptor 6                            | Plasma Membrane | G-protein coupled recept | H  | -110.621 | 0.000 | 1.437  | 0.755 | 2.660  | 0.014 |
| gi_153792426_ref_NM_001099726.1_ | 782045 | CYS1LTR1  | cysteinyln leukotriene receptor 1                           | Plasma Membrane | G-protein coupled recept | VH | -162.124 | 0.000 | 1.562  | 0.439 | 12.481 | 0.000 |
| gi_31343049_ref_NM_174010.2_     | 281052 | CD36      | CD36 molecule (thrombospondin receptor)                     | Plasma Membrane | transmembrane receptor   | VH | -185.369 | 0.000 | 2.016  | 0.051 | 2.040  | 0.123 |
| gi_119911249_ref_XM_867060.2_    | 615295 | LAIR1     | leukocyte-associated immunoglobulin-like receptor 1         | Plasma Membrane | transmembrane receptor   | VH | -230.065 | 0.000 | 1.227  | 1.175 | 1.082  | 1.141 |

**Table S6C: Cell Surface - ion channels and transporters**

| SEQ_ID                           | Entrez gene ID | Symbol   | Entrez Gene Name                                           | Location            | Type        | Predicted BL20 expression level | FC         |             | FDR         |                 | FC          |                 | FDR |  |
|----------------------------------|----------------|----------|------------------------------------------------------------|---------------------|-------------|---------------------------------|------------|-------------|-------------|-----------------|-------------|-----------------|-----|--|
|                                  |                |          |                                                            |                     |             |                                 | FC BLV/TBL | FDR BLV/TBL | TBLV/TBL24h | FDR TBLV/TBL24h | TBLV/TBL48h | FDR TBLV/TBL48h |     |  |
| gi_119894775_ref_XM_868927.2_    | 281276         | LDLR     | low density lipoprotein receptor                           | Plasma Membrane     | transporter | L                               | 117.922    | 0.000       | -1.400      | 0.095           | -1.191      | 0.528           |     |  |
| gi_76655242_ref_XM_582736.2_     | 538791         | KCNK18   | potassium channel, subfamily K, member 18                  | Plasma Membrane     | ion channel | N                               | 59.961     | 0.000       | -2.067      | 0.000           | -3.715      | 0.000           |     |  |
| gi_31341539_ref_NM_174610.2_     | 282366         | SLC6A6   | solute carrier family 6 (neurotransmitter transporter, ta  | Plasma Membrane     | transporter | M                               | 45.455     | 0.000       | -2.500      | 0.000           | -2.570      | 0.000           |     |  |
| gi_134085654_ref_NM_001083448.1_ | 527014         | SV2B     | synaptic vesicle glycoprotein 2B                           | Plasma Membrane     | transporter | L                               | 33.466     | 0.000       | -1.134      | 0.658           | -3.784      | 0.000           |     |  |
| gi_119911706_ref_XM_594012.3_    | 338035         | P2RX5    | purinergic receptor P2X, ligand-gated ion channel, 5       | Plasma Membrane     | ion channel | M                               | 24.146     | 0.000       | -1.444      | 0.056           | -1.855      | 0.002           |     |  |
| gi_119892068_ref_XM_868185.2_    | 537277         | SCN8A    | sodium channel, voltage gated, type VIII, alpha subuni     | Plasma Membrane     | ion channel | L                               | 16.099     | 0.000       | 2.166       | 0.027           | -1.071      | 0.916           |     |  |
| gi_125630722_ref_NM_001081543.1_ | 615761         | KCNE4    | potassium voltage-gated channel, Isk-related family, m     | Plasma Membrane     | ion channel | L                               | 11.016     | 0.000       | 2.399       | 0.010           | 2.891       | 0.007           |     |  |
| gi_47564023_ref_NM_001001134.1_  | 407132         | SLCO3A1  | solute carrier organic anion transporter family, member    | Plasma Membrane     | transporter | L                               | 9.861      | 0.000       | -1.500      | 0.034           | -2.761      | 0.000           |     |  |
| gi_119887104_ref_XM_587930.3_    | 510745         | ABCG1    | ATP-binding cassette, sub-family G (WHITE), member         | Plasma Membrane     | transporter | M                               | 7.545      | 0.000       | -6.325      | 0.000           | -4.659      | 0.000           |     |  |
| gi_31341556_ref_NM_174602.2_     | 282356         | SLC2A1   | solute carrier family 2 (facilitated glucose transporter), | Plasma Membrane     | transporter | H                               | 7.347      | 0.000       | -2.188      | 0.000           | -2.633      | 0.000           |     |  |
| gi_150247069_ref_NM_001099378.1_ | 521181         | SLC15A1  | solute carrier family 15 (oligopeptide transporter), mem   | Plasma Membrane     | transporter | L                               | 5.429      | 0.000       | -1.654      | 0.008           | -3.253      | 0.000           |     |  |
| gi_148234191_ref_NM_001098036.1_ | 515437         | SLC39A14 | solute carrier family 39 (zinc transporter), member 14     | Plasma Membrane     | transporter | H                               | 5.231      | 0.000       | -2.133      | 0.000           | -2.895      | 0.000           |     |  |
| gi_119907150_ref_XM_612483.3_    | 533166         | SORL1    | sorllin-related receptor, L(DLR class) A repeats-contai    | Plasma Membrane     | transporter | L                               | 4.761      | 0.000       | 5.674       | 0.000           | 8.918       | 0.000           |     |  |
| gi_31341534_ref_NM_174613.2_     | 282369         | SLC7A5   | solute carrier family 7 (cationic amino acid transporter,  | Plasma Membrane     | transporter | H                               | 4.114      | 0.000       | -4.668      | 0.000           | -4.840      | 0.000           |     |  |
| gi_158341669_ref_NM_001109980.1_ | 510085         | SLC16A3  | solute carrier family 16, member 3 (monocarboxylic ac      | Plasma Membrane     | transporter | L                               | 3.566      | 0.000       | -1.188      | 0.370           | -1.008      | 0.857           |     |  |
| gi_119893596_ref_XM_584935.3_    | 508193         | SLC39A8  | solute carrier family 39 (zinc transporter), member 8      | Extracellular Space | transporter | L                               | 3.557      | 0.000       | 1.351       | 0.976           | -1.767      | 0.005           |     |  |
| gi_115495866_ref_NM_001076246.1_ | 540853         | SNAP25   | synaptosomal-associated protein, 25kDa                     | Plasma Membrane     | transporter | N                               | 3.536      | 0.000       | -1.141      | 0.412           | -1.069      | 0.776           |     |  |
| gi_119889235_ref_XM_868686.2_    | 534180         | KCNN3    | potassium intermediate/small conductance calcium-ac        | Plasma Membrane     | ion channel | M                               | 3.158      | 0.000       | 1.006       | 1.003           | 1.481       | 0.874           |     |  |
| gi_119890545_ref_XM_614767.3_    | 541151         | TRPM8    | transient receptor potential cation channel, subfamily     | Plasma Membrane     | ion channel | L                               | 3.149      | 0.000       | 2.133       | 0.032           | 1.306       | 1.202           |     |  |
| gi_119889676_ref_XM_603860.3_    | 525507         | KCNA3    | potassium voltage-gated channel, shaker-related subf       | Plasma Membrane     | ion channel | L                               | 3.090      | 0.000       | 2.308       | 0.014           | -1.403      | 0.084           |     |  |
| gi_119924879_ref_XM_590317.3_    | 281585         | ABCB1    | ATP-binding cassette, sub-family B (MDR/TAP), memt         | Plasma Membrane     | transporter | L                               | 2.858      | 0.000       | 1.133       | 0.956           | 1.072       | 0.886           |     |  |
| gi_136255756_ref_NM_001075630.2_ | 513621         | VAMP1    | vesicle-associated membrane protein 1 (synaptobrevin       | Plasma Membrane     | transporter | M                               | 2.340      | 0.000       | -1.019      | 0.988           | -1.227      | 0.379           |     |  |
| gi_31341239_ref_NM_174833.2_     | 317654         | SLC9A1   | solute carrier family 9 (sodium/hydrogen exchanger), n     | Plasma Membrane     | ion channel | H                               | 1.907      | 0.001       | -1.404      | 0.093           | -1.049      | 0.984           |     |  |
| gi_27807092_ref_NM_174605.1_     | 282360         | SLC4A4   | solute carrier family 4, sodium bicarbonate cotransport    | Plasma Membrane     | transporter | H                               | 1.889      | 0.001       | 1.465       | 0.740           | 4.175       | 0.000           |     |  |

|                                  |        |         |                                                                                               |                     |             |    |        |       |        |       |        |       |
|----------------------------------|--------|---------|-----------------------------------------------------------------------------------------------|---------------------|-------------|----|--------|-------|--------|-------|--------|-------|
| gi_88319926_ref_NM_174068.2_     | 281193 | GJA1    | gap junction protein, alpha 1, 43kDa                                                          | Plasma Membrane     | transporter | H  | 1.858  | 0.002 | -1.270 | 0.272 | -2.729 | 0.000 |
| gi_119912484_ref_XM_587873.3_    | 510698 | VAT1    | vesicle amine transport protein 1 homolog (T. californica)                                    | Plasma Membrane     | transporter | H  | 1.835  | 0.001 | 1.983  | 0.078 | 2.075  | 0.114 |
| gi_125991751_ref_NM_174603.3_    | 282358 | SLC2A3  | solute carrier family 2 (facilitated glucose transporter), member 3                           | Plasma Membrane     | transporter | H  | 1.823  | 0.002 | -1.626 | 0.009 | -2.090 | 0.000 |
| gi_149643066_ref_NM_001099123.1_ | 613446 | PLLP    | plasma membrane proteolipid (plasmolipin)                                                     | Plasma Membrane     | transporter | L  | 1.810  | 0.002 | 3.740  | 0.000 | 2.780  | 0.009 |
| gi_119910207_ref_XM_865652.2_    | 533876 | SLC12A4 | solute carrier family 12 (potassium/chloride transporter), member 4                           | Plasma Membrane     | transporter | H  | 1.807  | 0.002 | -1.546 | 0.023 | -1.244 | 0.364 |
| gi_56699419_ref_NM_174607.1_     | 282362 | SLC5A3  | solute carrier family 5 (sodium/myo-inositol cotransporter), member 3                         | Plasma Membrane     | transporter | M  | 1.762  | 0.002 | -1.440 | 0.054 | -1.575 | 0.022 |
| gi_119912899_ref_XM_587636.3_    | 510497 | ABCA5   | ATP-binding cassette, sub-family A (ABC1), member 5                                           | Plasma Membrane     | transporter | H  | 1.749  | 0.003 | -1.022 | 0.974 | -1.254 | 0.423 |
| gi_31341563_ref_NM_174601.2_     | 282355 | SLC1A5  | solute carrier family 1 (neutral amino acid transporter), member 5                            | Plasma Membrane     | transporter | VH | 1.746  | 0.002 | -1.519 | 0.027 | -1.697 | 0.008 |
| gi_62177171_ref_NM_001014384.1_  | 541597 | KCNAB2  | potassium voltage-gated channel, shaker-related subfamily B, member 2                         | Plasma Membrane     | ion channel | H  | 1.739  | 0.002 | -1.292 | 0.239 | 1.075  | 1.274 |
| gi_122692594_ref_NM_001080288.1_ | 526291 | SLC13A3 | solute carrier family 13 (sodium-dependent dicarboxylate transporter), member 3               | Plasma Membrane     | transporter | L  | 1.703  | 0.005 | -1.037 | 0.830 | -1.241 | 0.227 |
| gi_119924210_ref_XM_001249496.1_ | 781113 | SLC5A3  | solute carrier family 5 (sodium/myo-inositol cotransporter), member 3                         | Plasma Membrane     | transporter | M  | 1.681  | 0.004 | -1.984 | 0.000 | -2.597 | 0.000 |
| gi_154152194_ref_NM_001100381.1_ | 518976 | SLC31A1 | solute carrier family 31 (copper transporters), member 1                                      | Plasma Membrane     | transporter | VH | 1.638  | 0.005 | -1.380 | 0.100 | -2.126 | 0.000 |
| gi_164448599_ref_NM_001024488.2_ | 507107 | SLC3A2  | solute carrier family 3 (activators of dibasic and neutral amino acid transporters), member 2 | Plasma Membrane     | transporter | H  | 1.594  | 0.007 | -1.861 | 0.001 | -1.686 | 0.008 |
| gi_115497811_ref_NM_001076453.1_ | 617307 | SLC19A1 | solute carrier family 19 (folate transporter), member 1                                       | Plasma Membrane     | transporter | VH | 1.579  | 0.007 | -1.531 | 0.022 | -1.670 | 0.009 |
| gi_155371936_ref_NM_001101103.1_ | 521189 | SLC11A2 | solute carrier family 11 (proton-coupled divalent metal ion transporters), member 2           | Plasma Membrane     | transporter | H  | 1.565  | 0.008 | 1.168  | 1.252 | 1.050  | 1.226 |
| gi_119908342_ref_XM_598445.3_    | 520210 | CLCN6   | chloride channel 6                                                                            | Plasma Membrane     | ion channel | H  | 1.552  | 0.009 | -1.536 | 0.028 | 1.006  | 1.133 |
| gi_122692298_ref_NM_001080231.1_ | 504503 | SLC29A3 | solute carrier family 29 (nucleoside transporters), member 3                                  | Plasma Membrane     | transporter | M  | 1.544  | 0.009 | 1.059  | 1.183 | 1.323  | 1.241 |
| gi_119908509_ref_XM_607245.3_    | 528813 | SCNN1D  | sodium channel, nonvoltage-gated 1, delta                                                     | Plasma Membrane     | ion channel | L  | 1.522  | 0.016 | -1.335 | 0.143 | -1.332 | 0.168 |
| gi_157954054_ref_NM_001109793.1_ | 511800 | ANKH    | ankylosis, progressive homolog (mouse)                                                        | Plasma Membrane     | transporter | VH | 1.515  | 0.010 | 1.701  | 0.297 | 1.562  | 0.705 |
| gi_119894467_ref_XM_614120.3_    | 534369 | ATP13A1 | ATPase type 13A1                                                                              | Extracellular Space | transporter | VH | 1.512  | 0.011 | -1.620 | 0.011 | -1.733 | 0.006 |
| gi_31341773_ref_NM_174519.2_     | 282184 | CLDN16  | claudin 16                                                                                    | Plasma Membrane     | transporter | L  | 1.496  | 0.017 | 3.504  | 0.000 | 3.568  | 0.001 |
| gi_115497975_ref_NM_001075207.1_ | 505563 | KCNK1   | potassium channel, subfamily K, member 1                                                      | Plasma Membrane     | ion channel | H  | 1.478  | 0.015 | -1.767 | 0.003 | -2.348 | 0.000 |
| gi_126158902_ref_NM_001081577.1_ | 326577 | SLC1A4  | solute carrier family 1 (glutamate/neutral amino acid transporter), member 4                  | Plasma Membrane     | transporter | VH | 1.453  | 0.019 | -1.955 | 0.000 | -1.932 | 0.001 |
| gi_122692468_ref_NM_001080300.1_ | 534568 | KCNMB2  | potassium large conductance calcium-activated channel, member 2                               | Plasma Membrane     | ion channel | L  | 1.423  | 0.025 | 4.022  | 0.000 | 2.952  | 0.006 |
| gi_31340942_ref_NM_174782.2_     | 286845 | SLC12A2 | solute carrier family 12 (sodium/potassium/chloride transporter), member 2                    | Plasma Membrane     | transporter | H  | 1.413  | 0.026 | -1.117 | 0.756 | -1.713 | 0.007 |
| gi_84370157_ref_NM_001038563.1_  | 538144 | TMED1   | transmembrane emp24 protein transport domain containing 1                                     | Extracellular Space | transporter | H  | 1.407  | 0.026 | -1.419 | 0.077 | -1.411 | 0.092 |
| gi_148224853_ref_NM_001076237.3_ | 540716 | SLC39A7 | solute carrier family 39 (zinc transporter), member 7                                         | Plasma Membrane     | transporter | VH | 1.406  | 0.026 | -1.474 | 0.045 | -1.560 | 0.025 |
| gi_119905633_ref_XM_611249.3_    | 507969 | SLCO4A1 | solute carrier organic anion transporter family, member 4A1                                   | Plasma Membrane     | transporter | H  | 1.394  | 0.030 | -1.841 | 0.001 | -2.532 | 0.000 |
| gi_119905474_ref_XM_001251156.1_ | 783536 | SLC23A2 | solute carrier family 23 (nucleobase transporters), member 2                                  | Plasma Membrane     | transporter | H  | 1.375  | 0.035 | 1.067  | 1.068 | 1.055  | 1.215 |
| gi_78369389_ref_NM_001035381.1_  | 530352 | SLC39A1 | solute carrier family 39 (zinc transporter), member 1                                         | Plasma Membrane     | transporter | H  | 1.373  | 0.037 | -1.137 | 0.695 | -1.097 | 0.854 |
| gi_156121042_ref_NM_001102198.1_ | 537280 | SLC19A3 | solute carrier family 19, member 3                                                            | Plasma Membrane     | transporter | H  | 1.369  | 0.037 | 1.591  | 0.477 | 1.275  | 1.331 |
| gi_139949143_ref_NM_001083743.1_ | 539478 | TM9SF1  | transmembrane 9 superfamily member 1                                                          | Plasma Membrane     | transporter | VH | 1.357  | 0.042 | 1.075  | 1.180 | -1.085 | 0.858 |
| gi_161760672_ref_NM_001075937.2_ | 530661 | SLC7A6  | solute carrier family 7 (cationic amino acid transporter, yaglycin transporter), member 6     | Plasma Membrane     | transporter | VH | 1.332  | 0.045 | -1.465 | 0.036 | -1.457 | 0.065 |
| gi_116734842_ref_NM_001075129.1_ | 282648 | CACNA1A | calcium channel, voltage-dependent, P/Q type, alpha 1                                         | Plasma Membrane     | ion channel | L  | -2.985 | 0.049 | -1.128 | 0.612 | 1.231  | 1.329 |
| gi_119894372_ref_XR_027411.1_    | 618257 | SORCS2  | sorbinin-related VPS10 domain containing receptor 2                                           | Plasma Membrane     | transporter | L  | -3.038 | 0.049 | 1.809  | 0.165 | 2.189  | 0.070 |
| gi_114052125_ref_NM_001046116.1_ | 512311 | SLC5A7  | solute carrier family 5 (choline transporter), member 7                                       | Plasma Membrane     | transporter | M  | -3.057 | 0.042 | 1.118  | 1.174 | 1.186  | 1.323 |
| gi_155371972_ref_NM_001101123.1_ | 525480 | SLC16A4 | solute carrier family 16, member 4 (monocarboxylic acid transporter), member 4                | Plasma Membrane     | transporter | L  | -3.068 | 0.042 | 1.475  | 0.626 | 1.497  | 0.812 |
| gi_119904862_ref_XM_593336.3_    | 515333 | ABCC4   | ATP-binding cassette, sub-family C (CFTR/MRP), member 4                                       | Plasma Membrane     | transporter | VH | -3.073 | 0.037 | -1.059 | 0.960 | -1.056 | 0.984 |
| gi_119902660_ref_XM_610426.3_    | 531921 | SLC28A2 | solute carrier family 28 (sodium-coupled nucleoside transporter), member 2                    | Plasma Membrane     | transporter | L  | -3.109 | 0.042 | 1.123  | 1.146 | 1.504  | 0.814 |
| gi_119906046_ref_XM_599598.3_    | 521338 | KCNK1   | potassium voltage-gated channel, delayed-rectifier, subfamily J, member 1                     | Plasma Membrane     | ion channel | L  | -3.185 | 0.034 | -1.090 | 0.653 | -1.067 | 0.778 |
| gi_114050716_ref_NM_001046476.1_ | 540406 | VAMP5   | vesicle-associated membrane protein 5 (myobrevin)                                             | Plasma Membrane     | transporter | H  | -3.205 | 0.029 | 1.363  | 0.965 | 1.404  | 1.079 |
| gi_76667956_ref_NM_603455.2_     | 525109 | KCNK10  | potassium channel, subfamily K, member 10                                                     | Plasma Membrane     | ion channel | H  | -3.278 | 0.023 | 1.642  | 0.379 | 1.237  | 1.343 |
| gi_157785612_ref_NM_001105628.1_ | 536495 | ATP10D  | ATPase, class V, type 10D                                                                     | Plasma Membrane     | transporter | H  | -3.282 | 0.023 | 2.266  | 0.017 | 3.647  | 0.001 |
| gi_155722980_ref_NM_001101042.1_ | 282868 | SLC2A5  | solute carrier family 2 (facilitated glucose/fructose transporter), member 2                  | Plasma Membrane     | transporter | L  | -3.312 | 0.024 | 48.731 | 0.000 | 38.989 | 0.000 |
| gi_119906802_ref_XM_869405.2_    | 617196 | SLC26A7 | solute carrier family 26, member 7                                                            | Plasma Membrane     | transporter | M  | -3.360 | 0.021 | 1.467  | 0.684 | -1.146 | 0.458 |
| gi_139948256_ref_NM_001083777.1_ | 617017 | RAMP1   | receptor (G protein-coupled) activity modifying protein 1                                     | Plasma Membrane     | transporter | H  | -3.388 | 0.021 | -1.297 | 0.206 | -1.385 | 0.116 |
| gi_119919426_ref_NM_001252337.1_ | 784876 | KCNQ1   | potassium voltage-gated channel, KQT-like subfamily, member 1                                 | Plasma Membrane     | ion channel | M  | -3.445 | 0.017 | 1.260  | 1.165 | 1.195  | 1.244 |
| gi_122692576_ref_NM_001080280.1_ | 518905 | SLC20A2 | solute carrier family 20 (phosphate transporter), member 2                                    | Plasma Membrane     | transporter | H  | -3.469 | 0.016 | 4.643  | 0.000 | 12.140 | 0.000 |
| gi_114050956_ref_NM_001046076.1_ | 511119 | GJC1    | gap junction protein, gamma 1, 45kDa                                                          | Plasma Membrane     | transporter | VH | -3.578 | 0.011 | 1.236  | 1.255 | 1.023  | 1.185 |
| gi_119901333_ref_XM_866973.2_    | 615226 | GRIK2   | glutamate receptor, ionotropic, kainate 2                                                     | Plasma Membrane     | ion channel | M  | -3.609 | 0.010 | -1.358 | 0.112 | 1.173  | 1.273 |
| gi_125991871_ref_NM_001081596.1_ | 529939 | LAMB3   | laminin, beta 3                                                                               | Extracellular Space | transporter | M  | -3.835 | 0.007 | -1.201 | 0.432 | 1.010  | 1.140 |
| gi_76638883_ref_XM_591410.2_     | 286814 | P2RX7   | purinergic receptor P2X, ligand-gated ion channel, 7                                          | Plasma Membrane     | ion channel | M  | -3.860 | 0.007 | 1.728  | 0.232 | 2.158  | 0.079 |
| gi_119912813_ref_XM_610029.3_    | 531531 | SLC16A5 | solute carrier family 16, member 5 (monocarboxylic acid transporter), member 5                | Plasma Membrane     | transporter | M  | -3.988 | 0.006 | -1.073 | 0.541 | 1.125  | 1.262 |
| gi_99028972_ref_NM_174195.3_     | 281518 | TCN2    | transcobalamin II; macrocytic anemia                                                          | Extracellular Space | transporter | H  | -4.054 | 0.004 | 2.883  | 0.001 | 4.362  | 0.000 |
| gi_119909528_ref_XM_599391.3_    | 521133 | SEC14L3 | SEC14-like 3 (S. cerevisiae)                                                                  | Extracellular Space | transporter | M  | -4.078 | 0.005 | 1.423  | 0.707 | 1.688  | 0.444 |
| gi_66792907_ref_NM_001024563.1_  | 535990 | KCNB2   | potassium voltage-gated channel, Shab-related subfamily B, member 2                           | Plasma Membrane     | ion channel | M  | -4.108 | 0.005 | -1.010 | 0.914 | -1.045 | 0.813 |
| gi_31341853_ref_NM_174489.2_     | 282123 | VLDLR   | very low density lipoprotein receptor                                                         | Plasma Membrane     | transporter | M  | -4.127 | 0.005 | 1.638  | 0.341 | 3.007  | 0.005 |
| gi_119892308_ref_XM_598691.2_    | 520448 | KCNMB4  | potassium large conductance calcium-activated channel, member 4                               | Plasma Membrane     | ion channel | H  | -4.207 | 0.004 | 1.762  | 0.214 | -1.022 | 1.056 |
| gi_119911727_ref_XM_864597.2_    | 507000 | SLC13A5 | solute carrier family 13 (sodium-dependent citrate transporter), member 5                     | Plasma Membrane     | transporter | H  | -4.506 | 0.002 | 2.710  | 0.002 | 3.208  | 0.003 |
| gi_119919062_ref_XM_585917.3_    | 539250 | KCNJ1   | potassium inwardly-rectifying channel, subfamily J, member 1                                  | Plasma Membrane     | ion channel | M  | -4.758 | 0.002 | -1.175 | 0.479 | 1.071  | 1.224 |
| gi_77735752_ref_NM_001034399.1_  | 511064 | FXRD6   | FXRD domain containing ion transport regulator 6                                              | Plasma Membrane     | ion channel | M  | -4.893 | 0.001 | 4.279  | 0.000 | 4.377  | 0.000 |
| gi_119910843_ref_XM_001253416.1_ | 785362 | SLC6A16 | solute carrier family 6, member 16                                                            | Plasma Membrane     | transporter | M  | -5.131 | 0.001 | 1.033  | 1.097 | 1.441  | 0.940 |
| gi_66792889_ref_NM_001024553.1_  | 518384 | KCNQ1   | potassium voltage-gated channel, Shal-related subfamily J, member 1                           | Plasma Membrane     | ion channel | H  | -5.194 | 0.001 | 1.463  | 0.748 | 5.931  | 0.000 |
| gi_119894510_ref_XM_868291.2_    | 480008 | KCNN1   | potassium intermediate/small conductance calcium-activated channel, subfamily N, member 1     | Plasma Membrane     | ion channel | M  | -5.298 | 0.001 | 1.189  | 1.178 | 1.272  | 1.303 |
| gi_148223920_ref_NM_001076336.2_ | 614573 | SLC16A7 | solute carrier family 16, member 7 (monocarboxylic acid transporter), member 7                | Plasma Membrane     | transporter | VH | -5.727 | 0.000 | 2.714  | 0.002 | 2.591  | 0.016 |
| gi_77404276_ref_NM_001034049.1_  | 338036 | P2RX4   | purinergic receptor P2X, ligand-gated ion channel, 4                                          | Plasma Membrane     | ion channel | H  | -5.759 | 0.000 | 1.983  | 0.071 | 2.748  | 0.010 |

|                                  |        |          |                                                                                                         |                     |             |    |          |       |        |       |        |       |
|----------------------------------|--------|----------|---------------------------------------------------------------------------------------------------------|---------------------|-------------|----|----------|-------|--------|-------|--------|-------|
| gi_119931673_ref_XM_001249309.1_ | 781005 | SERINC2  | serine incorporator 2                                                                                   | Plasma Membrane     | transporter | H  | -5.825   | 0.000 | 5.902  | 0.000 | 11.210 | 0.000 |
| gi_70778797_ref_NM_001025333.1_  | 516626 | OSTALPHA | organic solute transporter alpha                                                                        | Plasma Membrane     | transporter | M  | -5.879   | 0.000 | 1.471  | 0.655 | 1.075  | 1.279 |
| gi_119918891_ref_XM_606459.3_    | 528050 | SLC6A5   | solute carrier family 6 (neurotransmitter transporter, gly)                                             | Plasma Membrane     | transporter | H  | -6.032   | 0.000 | 1.300  | 1.189 | -1.107 | 0.748 |
| gi_78370166_ref_NM_001035285.1_  | 513593 | SERINC2  | serine incorporator 2                                                                                   | Plasma Membrane     | transporter | H  | -6.116   | 0.000 | 5.071  | 0.000 | 9.998  | 0.000 |
| gi_119912178_ref_XM_612461.3_    | 533151 | ABCC3    | ATP-binding cassette, sub-family C (CFTR/MRP), member 3                                                 | Plasma Membrane     | transporter | VH | -6.476   | 0.000 | 1.872  | 0.122 | 4.046  | 0.000 |
| gi_112817614_ref_NM_001037478.2_ | 536203 | ABCG2    | ATP-binding cassette, sub-family G (WHITE), member 2                                                    | Plasma Membrane     | transporter | VH | -7.117   | 0.000 | 2.645  | 0.004 | 2.579  | 0.018 |
| gi_119895570_ref_XM_581784.3_    | 505492 | SLC23A1  | solute carrier family 23 (nucleobase transporters), member 1                                            | Plasma Membrane     | transporter | M  | -7.174   | 0.000 | 1.382  | 0.974 | 1.739  | 0.387 |
| gi_115497519_ref_NM_001075151.1_ | 504220 | SLC7A7   | solute carrier family 7 (cationic amino acid transporter, high-affinity neutral amino acid transporter) | Plasma Membrane     | transporter | VH | -7.348   | 0.000 | 3.765  | 0.000 | 5.496  | 0.000 |
| gi_115496685_ref_NM_001075325.1_ | 507672 | FOLR2    | folate receptor 2 (fetal)                                                                               | Plasma Membrane     | transporter | M  | -7.688   | 0.000 | 1.676  | 0.245 | 5.408  | 0.000 |
| gi_119906935_ref_XM_586071.3_    | 407151 | TRPC6    | transient receptor potential cation channel, subfamily C member 6                                       | Plasma Membrane     | ion channel | H  | -9.004   | 0.000 | 1.394  | 0.917 | -1.792 | 0.004 |
| gi_119911701_ref_XM_863847.2_    | 539074 | TRPV1    | transient receptor potential cation channel, subfamily V member 1                                       | Plasma Membrane     | ion channel | M  | -10.925  | 0.000 | -1.100 | 0.425 | -1.102 | 0.367 |
| gi_119920329_ref_XM_586812.3_    | 509779 | CACNA1F  | calcium channel, voltage-dependent, L type, alpha 1F                                                    | Plasma Membrane     | ion channel | H  | -11.252  | 0.000 | 1.733  | 0.232 | 2.573  | 0.019 |
| gi_115494983_ref_NM_001076301.1_ | 613972 | APOD     | apolipoprotein D                                                                                        | Extracellular Space | transporter | H  | -11.536  | 0.000 | 2.512  | 0.006 | 2.502  | 0.024 |
| gi_119331227_ref_NM_001079794.1_ | 780866 | AQP3     | aquaporin 3 (Gill blood group)                                                                          | Plasma Membrane     | transporter | VH | -12.681  | 0.000 | 8.980  | 0.000 | 12.438 | 0.000 |
| gi_119915752_ref_XM_584165.3_    | 507535 | SLC17A1  | solute carrier family 17 (sodium phosphate), member 1                                                   | Plasma Membrane     | transporter | M  | -12.793  | 0.000 | 1.197  | 1.255 | 1.454  | 0.924 |
| gi_119912146_ref_XM_001252666.1_ | 282411 | CACNA1G  | calcium channel, voltage-dependent, T type, alpha 1G                                                    | Plasma Membrane     | ion channel | H  | -16.162  | 0.000 | -1.340 | 0.097 | 1.016  | 0.827 |
| gi_56710326_ref_NM_001008666.1_  | 493988 | SLC14A1  | solute carrier family 14 (urea transporter), member 1                                                   | Plasma Membrane     | transporter | M  | -17.271  | 0.000 | 1.230  | 1.257 | 1.169  | 1.323 |
| gi_118150847_ref_NM_001077867.1_ | 507185 | OSTBETA  | organic solute transporter beta                                                                         | Plasma Membrane     | transporter | H  | -18.206  | 0.000 | 1.927  | 0.092 | 5.650  | 0.000 |
| gi_31341522_ref_NM_174618.2_     | 282377 | STX1B    | syntaxin 1B                                                                                             | Plasma Membrane     | ion channel | H  | -18.646  | 0.000 | 1.792  | 0.155 | 4.925  | 0.000 |
| gi_119911051_ref_XM_599883.3_    | 521616 | CACNG6   | calcium channel, voltage-dependent, gamma subunit 6                                                     | Plasma Membrane     | ion channel | H  | -28.982  | 0.000 | 1.384  | 0.568 | 1.338  | 1.041 |
| gi_119918570_ref_XM_001252944.1_ | 784716 | CDH23    | cadherin-like 23                                                                                        | Plasma Membrane     | transporter | H  | -28.982  | 0.000 | -1.263 | 0.281 | -1.120 | 0.651 |
| gi_119904117_ref_XM_605012.3_    | 526639 | LCN2     | lipocalin 2                                                                                             | Extracellular Space | transporter | H  | -30.326  | 0.000 | -1.055 | 0.804 | 1.446  | 0.887 |
| gi_32189337_ref_NM_174143.1_     | 281401 | PIGR     | polymeric immunoglobulin receptor                                                                       | Plasma Membrane     | transporter | H  | -85.226  | 0.000 | 2.400  | 0.010 | 3.736  | 0.001 |
| gi_157954060_ref_NM_001109795.1_ | 513856 | A2M      | alpha-2-macroglobulin                                                                                   | Extracellular Space | transporter | VH | -109.925 | 0.000 | 2.001  | 0.059 | 4.697  | 0.000 |
| gi_31341436_ref_NM_174652.2_     | 282470 | SLC11A1  | solute carrier family 11 (proton-coupled divalent metal ion transporter)                                | Plasma Membrane     | transporter | VH | -238.083 | 0.000 | 2.273  | 0.015 | 8.234  | 0.000 |
