# Supplementary material for: A Bovine Lymphosarcoma Cell Line Infected with Theileria annulata Exhibits an Irreversible Reconfiguration of Host Cell Gene Expression
Source: PubMed Central journal article supplement (PMC3694138; doi:10.1371/journal.pone.0066833), 2013-06-26
Supplement: pone.0066833.s009.pdf [file pone.0066833.s009.pdf]

**Table S7A: Transcription**

| SEQ_ID                           | Entrez gene ID | Symbol           | Entrez Gene Name                                                          | Location  | Type                    | Predicted BL20 expression level | FC       |             | FDR        |            |            |            |
|----------------------------------|----------------|------------------|---------------------------------------------------------------------------|-----------|-------------------------|---------------------------------|----------|-------------|------------|------------|------------|------------|
|                                  |                |                  |                                                                           |           |                         |                                 | FC BLVTL | FDR BLVsTBL | TBLvTBL24h | TBLvTBL24h | TBLvTBL48h | TBLvTBL48h |
| gi_114053110_ref_NM_001046252.1_ | 520564         | LITAF            | lipopolysaccharide-induced TNF factor                                     | Nucleus   | transcription regulator | L                               | 116.161  | 0.000       | 1.021      | 1.055      | -1.231     | 0.391      |
| gi_119927959_ref_XM_593064.3_    | 515105         | TP73             | tumor protein p73                                                         | Nucleus   | transcription regulator | L                               | 98.669   | 0.000       | -1.451     | 0.049      | -1.169     | 0.512      |
| gi_119910732_ref_XM_869544.2_    | 617311         | MEIS3            | Meis homeobox 3                                                           | Nucleus   | transcription regulator | M                               | 65.152   | 0.000       | -1.973     | 0.000      | -2.028     | 0.000      |
| gi_62460599_ref_NM_001014950.1_  | 538690         | ID3              | inhibitor of DNA binding 3, dominant negative helix-loop-helix            | Nucleus   | transcription regulator | L                               | 58.057   | 0.000       | 1.392      | 0.811      | 1.849      | 0.251      |
| gi_119919278_ref_XM_609882.3_    | 531389         | FOSL1            | FOS-like antigen 1                                                        | Nucleus   | transcription regulator | L                               | 37.291   | 0.000       | -3.872     | 0.000      | -5.028     | 0.000      |
| gi_134085833_ref_NM_001083490.1_ | 538716         | HOXC13           | homeobox C13                                                              | Nucleus   | transcription regulator | L                               | 15.968   | 0.000       | 2.058      | 0.046      | 2.149      | 0.084      |
| gi_78369225_ref_NM_001035273.1_  | 508156         | SSBP4            | single stranded DNA binding protein 4                                     | Nucleus   | transcription regulator | M                               | 14.333   | 0.000       | -1.660     | 0.009      | -1.000     | 1.092      |
| gi_157168340_ref_NM_001103253.1_ | 517192         | JUND             | jun D proto-oncogene                                                      | Nucleus   | transcription regulator | M                               | 12.326   | 0.000       | -2.471     | 0.000      | -1.479     | 0.054      |
| gi_119903790_ref_XM_864138.2_    | 509889         | FOSL2            | FOS-like antigen 2                                                        | Nucleus   | transcription regulator | H                               | 12.227   | 0.000       | -1.035     | 0.922      | 1.401      | 1.087      |
| gi_156120848_ref_NM_001110210.1_ | 526392         | NFKB2            | nuclear factor of kappa light polypeptide gene enhancer 2                 | Nucleus   | transcription regulator | H                               | 9.354    | 0.000       | -2.838     | 0.000      | -1.390     | 0.123      |
| gi_119888839_ref_XM_869638.2_    | 617389         | RUNX3            | runt-related transcription factor 3                                       | Nucleus   | transcription regulator | H                               | 8.600    | 0.000       | -1.414     | 0.084      | 1.562      | 0.689      |
| gi_95147677_ref_NM_001033119.2_  | 503622         | FOXA3            | forkhead box A3                                                           | Nucleus   | transcription regulator | L                               | 6.348    | 0.000       | -1.269     | 0.300      | -1.576     | 0.021      |
| gi_115495012_ref_NM_001075819.1_ | 521378         | CITED2           | Cbp/p300-interacting transactivator, with Glu/Asp-rich c                  | Nucleus   | transcription regulator | H                               | 5.909    | 0.000       | -2.431     | 0.000      | -2.881     | 0.000      |
| gi_119912123_ref_XR_028313.1_    | 785855         | HOXB8            | homeobox B8                                                               | Nucleus   | transcription regulator | L                               | 5.121    | 0.000       | 2.258      | 0.018      | 1.788      | 0.318      |
| gi_119913920_ref_NM_592227.3_    | 540196         | PAX9             | paired box 9                                                              | Nucleus   | transcription regulator | L                               | 5.083    | 0.000       | 1.662      | 0.305      | 1.309      | 1.221      |
| gi_123959745_ref_NM_001080726.1_ | 504742         | CITED4           | Cbp/p300-interacting transactivator, with Glu/Asp-rich c                  | Nucleus   | transcription regulator | M                               | 4.724    | 0.000       | -1.607     | 0.012      | -1.245     | 0.321      |
| gi_167583505_ref_NM_001114515.1_ | 614673         | NUPR1            | nuclear protein, transcriptional regulator, 1                             | Nucleus   | transcription regulator | M                               | 4.187    | 0.000       | 2.472      | 0.007      | 7.045      | 0.000      |
| gi_119901328_ref_XM_618588.3_    | 538384         | PRDM1            | PR domain containing 1, with ZNF domain                                   | Nucleus   | transcription regulator | H                               | 4.186    | 0.000       | -1.006     | 1.041      | 1.355      | 1.166      |
| gi_119901924_ref_XM_001251809.1_ | 515125         | SMAD3            | SMAD family member 3                                                      | Nucleus   | transcription regulator | H                               | 4.105    | 0.000       | 1.177      | 1.249      | 1.416      | 1.060      |
| gi_119908089_ref_XM_586687.3_    | 539364         | BTG2             | BTG family, member 2                                                      | Nucleus   | transcription regulator | M                               | 4.041    | 0.000       | -1.428     | 0.057      | -1.093     | 0.799      |
| gi_156120726_ref_NM_001102040.1_ | 516952         | SATB1            | SATB homeobox 1                                                           | Nucleus   | transcription regulator | M                               | 4.014    | 0.000       | -1.226     | 0.377      | -1.082     | 0.818      |
| gi_110347584_ref_NM_182786.2_    | 280795         | FOS              | FBJ murine osteosarcoma viral oncogene homolog                            | Nucleus   | transcription regulator | H                               | 3.966    | 0.000       | -1.263     | 0.279      | -1.537     | 0.029      |
| gi_119915104_ref_XM_591149.3_    | 513466         | TEAD3            | TEA domain family member 3                                                | Nucleus   | transcription regulator | M                               | 3.941    | 0.000       | -2.533     | 0.000      | -2.676     | 0.000      |
| gi_67972412_ref_NM_001024929.1_  | 506945         | BHLHE40          | basic helix-loop-helix family, member e40                                 | Nucleus   | transcription regulator | VH                              | 3.779    | 0.000       | 1.098      | 1.217      | 1.019      | 1.188      |
| gi_41386700_ref_NM_174726.1_     | 282713         | NFKBIZ           | nuclear factor of kappa light polypeptide gene enhancer 2                 | Nucleus   | transcription regulator | H                               | 3.766    | 0.000       | 1.912      | 1.012      | 1.945      | 0.183      |
| gi_119919224_ref_XM_615207.3_    | 541233         | RCOR2            | REST corepressor 2                                                        | Nucleus   | transcription regulator | M                               | 3.528    | 0.000       | -1.122     | 0.673      | 2.139      | 0.086      |
| gi_119910676_ref_XM_600955.3_    | 522670         | RELB             | v-rel reticuloendotheliosis viral oncogene homolog B                      | Nucleus   | transcription regulator | M                               | 3.422    | 0.000       | -2.161     | 0.000      | -1.074     | 0.923      |
| gi_119900643_ref_XM_604596.3_    | 526233         | EGR3             | early growth response 3                                                   | Nucleus   | transcription regulator | H                               | 3.238    | 0.000       | -3.012     | 0.000      | -1.776     | 0.004      |
| gi_119879716_ref_XM_001250887.1_ | 539020         | BCL6             | B-cell CLL/lymphoma 6                                                     | Nucleus   | transcription regulator | L                               | 3.229    | 0.000       | -1.954     | 0.000      | -1.165     | 0.541      |
| gi_77735420_ref_NM_001034231.1_  | 505025         | ID2              | inhibitor of DNA binding 2, dominant negative helix-loop-helix            | Nucleus   | transcription regulator | VH                              | 2.939    | 0.000       | 1.192      | 1.252      | 1.082      | 1.282      |
| gi_119891401_ref_XM_590833.3_    | 513185         | PARP12           | poly (ADP-ribose) polymerase family, member 12                            | Nucleus   | other                   | M                               | 2.811    | 0.000       | 5.184      | 0.000      | 12.238     | 0.000      |
| gi_78365288_ref_NM_001035465.1_  | 615340         | IRF5             | interferon regulatory factor 5                                            | Nucleus   | transcription regulator | M                               | 2.796    | 0.000       | 2.108      | 0.038      | 2.786      | 0.009      |
| gi_94966918_ref_NM_001040564.1_  | 539321         | SERTAD1          | SERTA domain containing 1                                                 | Nucleus   | transcription regulator | M                               | 2.786    | 0.000       | -1.795     | 0.002      | -1.892     | 0.002      |
| gi_157074115_ref_NM_001103300.1_ | 617914         | MAFF             | v-maf musculoaponeurotic fibrosarcoma oncogene homolog                    | Nucleus   | transcription regulator | M                               | 2.672    | 0.000       | -3.228     | 0.000      | -2.321     | 0.000      |
| gi_164519007_ref_NM_001113302.1_ | 539361         | SREBF1           | sterol regulatory element binding transcription factor 1                  | Nucleus   | transcription regulator | H                               | 2.595    | 0.000       | -7.844     | 0.000      | -2.673     | 0.000      |
| gi_118601779_ref_NM_001079591.1_ | 513983         | SCAND1           | SCAN domain containing 1                                                  | Nucleus   | transcription regulator | H                               | 2.563    | 0.000       | -1.869     | 0.000      | -2.168     | 0.000      |
| gi_115495324_ref_NM_001075935.1_ | 530610         | ATF6             | activating transcription factor 6                                         | Cytoplasm | transcription regulator | VH                              | 2.521    | 0.000       | -1.551     | 0.020      | -1.693     | 0.008      |
| gi_119910608_ref_XM_610447.3_    | 531942         | BCL3             | B-cell CLL/lymphoma 3                                                     | Nucleus   | transcription regulator | L                               | 2.483    | 0.000       | -1.149     | 0.391      | 2.639      | 0.014      |
| gi_77736398_ref_NM_001034727.1_  | 541236         | XPB1             | X-box binding protein 1                                                   | Nucleus   | transcription regulator | H                               | 2.404    | 0.000       | -2.298     | 0.000      | -1.747     | 0.006      |
| gi_77735604_ref_NM_001034326.1_  | 508638         | NOC2L            | nucleolar complex associated 2 homolog (S. cerevisiae)                    | Nucleus   | transcription regulator | VH                              | 2.327    | 0.000       | -1.498     | 0.032      | -1.790     | 0.004      |
| gi_70778751_ref_NM_001025344.1_  | 538951         | NANOG            | Nanog homeobox                                                            | Nucleus   | transcription regulator | N                               | 2.261    | 0.000       | -2.393     | 0.000      | -2.434     | 0.000      |
| gi_60592797_ref_NM_001012673.1_  | 282375         | STAT5A           | signal transducer and activator of transcription 5A                       | Nucleus   | transcription regulator | VH                              | 2.254    | 0.000       | -1.087     | 0.840      | 1.193      | 1.342      |
| gi_125991883_ref_NM_001081579.1_ | 504991         | ANKRD22          | ankyrin repeat domain 22                                                  | Nucleus   | transcription regulator | N                               | 2.176    | 0.000       | 1.233      | 1.249      | -1.005     | 0.797      |
| gi_115497301_ref_NM_001076409.1_ | 616115         | NFKB1            | nuclear factor of kappa light polypeptide gene enhancer 1                 | Nucleus   | transcription regulator | VH                              | 2.141    | 0.000       | -1.398     | 0.093      | -1.145     | 0.698      |
| gi_119909893_ref_XM_606758.3_    | 528338         | ZFPM1 (includes) | zinc finger protein, multitype 1                                          | Nucleus   | transcription regulator | M                               | 2.126    | 0.000       | -1.704     | 0.006      | -1.084     | 0.775      |
| gi_119879695_ref_XM_867115.2_    | 615335         | TP63             | tumor protein p63                                                         | Nucleus   | transcription regulator | L                               | 2.073    | 0.001       | 2.399      | 0.010      | 11.094     | 0.000      |
| gi_119916372_ref_XM_616030.3_    | 535916         | SMAD7            | SMAD family member 7                                                      | Nucleus   | transcription regulator | H                               | 2.067    | 0.000       | 1.297      | 1.200      | 2.153      | 0.082      |
| gi_115497081_ref_NM_001075656.1_ | 514246         | JUNB             | jun B proto-oncogene                                                      | Nucleus   | transcription regulator | H                               | 2.028    | 0.001       | -3.199     | 0.000      | -2.049     | 0.000      |
| gi_119893790_ref_XM_608827.3_    | 530358         | KLF3             | Kruppel-like factor 3 (basic)                                             | Nucleus   | transcription regulator | H                               | 2.005    | 0.001       | 1.040      | 1.146      | 1.263      | 1.337      |
| gi_154152114_ref_NM_001100336.1_ | 510923         | TRIM25           | tripartite motif-containing 25                                            | Cytoplasm | transcription regulator | VH                              | 1.957    | 0.001       | -1.054     | 0.953      | 1.074      | 1.262      |
| gi_119911776_ref_XM_590665.3_    | 513045         | MYBBP1A          | MYB binding protein (P160) 1a                                             | Nucleus   | transcription regulator | VH                              | 1.927    | 0.001       | -2.545     | 0.000      | -2.738     | 0.000      |
| gi_106880502_ref_NM_001034710.2_ | 540605         | CREM             | cAMP responsive element modulator                                         | Nucleus   | transcription regulator | H                               | 1.919    | 0.001       | -1.359     | 0.144      | -1.403     | 0.103      |
| gi_119904107_ref_XM_599033.3_    | 493639         | PTGES2           | prostaglandin E synthase 2                                                | Cytoplasm | transcription regulator | H                               | 1.917    | 0.001       | -1.753     | 0.002      | -1.995     | 0.001      |
| gi_119889242_ref_XM_585895.3_    | 509019         | ZBTB7B           | zinc finger and BTB domain containing 7B                                  | Nucleus   | transcription regulator | H                               | 1.900    | 0.001       | -2.238     | 0.000      | 1.707      | 0.419      |
| gi_119913325_ref_XM_604226.3_    | 525869         | RAI14            | retinoic acid induced 14                                                  | Nucleus   | transcription regulator | L                               | 1.855    | 0.002       | -1.520     | 0.029      | -1.143     | 0.594      |
| gi_118151389_ref_NM_001077900.1_ | 510814         | STAT1            | signal transducer and activator of transcription 1, 91kDa                 | Nucleus   | transcription regulator | VH                              | 1.847    | 0.001       | 1.189      | 1.255      | 1.154      | 1.333      |
| gi_116003828_ref_NM_001076804.1_ | 505169         | GATA3            | GATA binding protein 3                                                    | Nucleus   | transcription regulator | L                               | 1.843    | 0.005       | -1.330     | 0.117      | 1.126      | 1.133      |
| gi_119915866_ref_XM_607555.3_    | 529115         | HIVEP1           | human immunodeficiency virus type 1 enhancer binding protein 1            | Nucleus   | transcription regulator | L                               | 1.802    | 0.004       | -1.680     | 0.006      | -1.130     | 0.652      |
| gi_190360732_ref_NM_001128499.1_ | 510050         | TGIF1            | TGFB-induced factor homeobox 1                                            | Nucleus   | transcription regulator | H                               | 1.793    | 0.002       | 1.089      | 1.179      | -1.444     | 0.070      |
| gi_76611568_ref_XM_869196.1_     | 617024         | E2F2             | E2F transcription factor 2                                                | Nucleus   | transcription regulator | H                               | 1.780    | 0.002       | -2.427     | 0.000      | -2.359     | 0.000      |
| gi_118150933_ref_NM_001077914.1_ | 513047         | ING1             | inhibitor of growth family, member 1                                      | Nucleus   | transcription regulator | M                               | 1.776    | 0.003       | -1.629     | 0.010      | -1.853     | 0.002      |
| gi_119906085_ref_XM_608872.3_    | 530401         | NFATC2           | nuclear factor of activated T-cells, cytoplasmic, calcineurin-dependent 2 | Nucleus   | transcription regulator | M                               | 1.755    | 0.004       | -1.798     | 0.006      | 1.372      | 1.058      |
| gi_119917017_ref_XM_877865.2_    | 509874         | GTF3C1           | general transcription factor IIIC, polypeptide 1, alpha 2                 | Nucleus   | transcription regulator | H                               | 1.748    | 0.002       | -1.615     | 0.013      | -1.028     | 1.046      |
| gi_118150773_ref_NM_001077827.1_ | 280831         | JUN              | jun oncogene                                                              | Nucleus   | transcription regulator | M                               | 1.730    | 0.004       | 1.390      | 0.774      | 4.708      | 0.000      |
| gi_119907762_ref_XM_590741.3_    | 513105         | CREB3L1          | cAMP responsive element binding protein 3-like 1                          | Nucleus   | transcription regulator | L                               | 1.710    | 0.004       | 1.651      | 0.334      | 1.330      | 1.179      |
| gi_119905866_ref_XM_615740.3_    | 535632         | TGIF2            | TGFB-induced factor homeobox 2                                            | Nucleus   | transcription regulator | H                               | 1.704    | 0.004       | -1.476     | 0.045      | -1.058     | 0.891      |
| gi_116004218_ref_NM_001077001.1_ | 767928         | RPB1             | recombination signal binding protein for immunoglobulin heavy chain       | Nucleus   | transcription regulator | VH                              | 1.689    | 0.004       | 1.042      | 1.151      | -1.195     | 0.527      |
| gi_115497487_ref_NM_001076141.1_ | 539003         | CTNNB1           | catenin (cadherin-associated protein), beta 1, 88kDa                      | Nucleus   | transcription regulator | VH                              | 1.680    | 0.004       | 1.025      | 1.137      | -1.034     | 1.042      |

|                                  |           |         |                                                            |                 |                         |    |        |       |        |       |        |       |
|----------------------------------|-----------|---------|------------------------------------------------------------|-----------------|-------------------------|----|--------|-------|--------|-------|--------|-------|
| gi_78369189_ref_NM_001035349.1_  | 524118    | ARID5A  | AT rich interactive domain 5A (MRF1-like)                  | Nucleus         | transcription regulator | H  | 1.592  | 0.006 | -2.243 | 0.000 | -1.682 | 0.008 |
| gi_119901277_ref_XM_615634.3_    | 535530    | FOXO3   | forkhead box O3                                            | Nucleus         | transcription regulator | VH | 1.571  | 0.007 | -1.003 | 0.925 | 1.823  | 0.287 |
| gi_115495776_ref_NM_001075448.1_ | 510420    | MYBL2   | v-myb myeloblastosis viral oncogene homolog (avian)-       | Nucleus         | transcription regulator | VH | 1.567  | 0.008 | -1.877 | 0.000 | -2.078 | 0.000 |
| gi_78042545_ref_NM_001035098.1_  | 511280    | NMI     | N-myc (and STAT) interactor                                | Cytoplasm       | transcription regulator | H  | 1.564  | 0.007 | 1.158  | 1.234 | -1.206 | 0.457 |
| gi_119894953_ref_XM_001255535.1_ | 788491    | ZBTB7A  | zinc finger and BTB domain containing 7A                   | Nucleus         | transcription regulator | H  | 1.550  | 0.010 | -2.271 | 0.000 | -1.444 | 0.073 |
| gi_115497489_ref_NM_001075872.1_ | 525408    | NFKBIB  | nuclear factor of kappa light polypeptide gene enhance     | Nucleus         | transcription regulator | H  | 1.545  | 0.008 | -1.911 | 0.000 | -2.075 | 0.000 |
| gi_119894776_ref_XR_028159.1_    | 784795    | CARM1   | coactivator-associated arginine methyltransferase 1        | Nucleus         | transcription regulator | VH | 1.543  | 0.010 | -1.542 | 0.024 | -1.214 | 0.456 |
| gi_84000132_ref_NM_001038072.1_  | 510666    | BM1     | BM11 polycomb ring finger oncogene                         | Nucleus         | transcription regulator | VH | 1.542  | 0.009 | 1.093  | 1.217 | -1.036 | 1.038 |
| gi_114052756_ref_NM_001045875.1_ | 407125    | EGR1    | early growth response 1                                    | Nucleus         | transcription regulator | H  | 1.533  | 0.010 | -1.221 | 0.400 | 1.800  | 0.314 |
| gi_47584055_ref_NM_001001150.1_  | 407219    | MITF    | microphthalmia-associated transcription factor             | Nucleus         | transcription regulator | H  | 1.532  | 0.010 | 1.643  | 0.373 | 1.919  | 0.196 |
| gi_125630716_ref_NM_001081542.1_ | 541125    | ELK3    | ELK3, ETS-domain protein (SRF accessory protein 2)         | Nucleus         | transcription regulator | VH | 1.517  | 0.011 | -1.007 | 1.057 | -1.079 | 0.887 |
| gi_84370155_ref_NM_001038565.1_  | 539291    | MYCBP   | c-myc binding protein                                      | Nucleus         | transcription regulator | H  | 1.513  | 0.012 | -1.597 | 0.013 | -2.021 | 0.000 |
| gi_115497653_ref_NM_001075240.1_ | 506097    | NFIL3   | nuclear factor, interleukin 3 regulated                    | Nucleus         | transcription regulator | H  | 1.511  | 0.011 | 1.026  | 1.137 | -1.191 | 0.536 |
| gi_119911729_ref_XM_870907.2_    | 618576    | MNT     | MAX binding protein                                        | Nucleus         | transcription regulator | H  | 1.509  | 0.013 | -2.683 | 0.000 | 1.009  | 1.092 |
| gi_164420754_ref_NM_001076875.2_ | 525256    | PREB    | prolactin regulatory element binding                       | Nucleus         | transcription regulator | H  | 1.507  | 0.013 | -1.706 | 0.005 | -1.772 | 0.004 |
| gi_119911595_ref_XM_868906.2_    | 538671    | SUPT6H  | suppressor of Ty 6 homolog (S. cerevisiae)                 | Nucleus         | transcription regulator | VH | 1.504  | 0.013 | -1.338 | 0.165 | -1.077 | 0.908 |
| gi_119915909_ref_XM_865312.2_    | 506141    | IRF4    | interferon regulatory factor 4                             | Nucleus         | transcription regulator | H  | 1.470  | 0.018 | -1.848 | 0.001 | -2.502 | 0.000 |
| gi_115496443_ref_NM_001075346.1_ | 508127    | DMAP1   | DNA methyltransferase 1 associated protein 1               | Nucleus         | transcription regulator | VH | 1.458  | 0.018 | -1.353 | 0.145 | -1.244 | 0.351 |
| gi_165905558_ref_NM_001046125.2_ | 512562    | MAGED1  | melanoma antigen family D, 1                               | Plasma Membrane | transcription regulator | VH | 1.452  | 0.018 | 1.158  | 1.252 | 1.181  | 1.341 |
| gi_119916184_ref_XM_596212.3_    | 518030    | TAF4B   | TAF4b RNA polymerase II, TATA box binding protein (T       | Nucleus         | transcription regulator | H  | 1.448  | 0.021 | -1.169 | 0.541 | -1.591 | 0.019 |
| gi_99028933_ref_NM_001040645.1_  | 286857    | PAX6    | paired box 6                                               | Nucleus         | transcription regulator | M  | 1.446  | 0.022 | 4.146  | 0.000 | 5.370  | 0.000 |
| gi_119915359_ref_XM_583214.3_    | 506727    | NFKBIE  | nuclear factor of kappa light polypeptide gene enhance     | Nucleus         | transcription regulator | H  | 1.419  | 0.028 | -1.186 | 0.484 | 1.002  | 1.105 |
| gi_66792933_ref_NM_001024574.1_  | 553098    | NFIC    | nuclear factor I/C (CCAAT-binding transcription factor)    | Nucleus         | transcription regulator | M  | 1.419  | 0.031 | 1.075  | 1.178 | 1.039  | 1.172 |
| gi_114052113_ref_NM_001046375.1_ | 534228    | PRPF6   | PRP6 pre-mRNA processing factor 6 homolog (S. cere         | Nucleus         | transcription regulator | VH | 1.415  | 0.026 | -1.062 | 0.902 | -1.072 | 0.915 |
| gi_62751533_ref_NM_001015625.1_  | 520639    | CLPB    | ClpB caseinolytic peptidase B homolog (E. coli)            | Nucleus         | transcription regulator | H  | 1.405  | 0.030 | -1.429 | 0.064 | -1.847 | 0.003 |
| gi_115497971_ref_NM_001076104.1_ | 538474    | NFIB    | nuclear factor I/B                                         | Nucleus         | transcription regulator | L  | 1.404  | 0.031 | 1.421  | 0.865 | 1.137  | 1.312 |
| gi_119905767_ref_XM_606138.3_    | 527740    | CBFA2T2 | core-binding factor, runt domain, alpha subunit 2; trans   | Nucleus         | transcription regulator | H  | 1.402  | 0.032 | 1.114  | 1.186 | 1.269  | 1.330 |
| gi_77736577_ref_NM_001034800.1_  | 617277    | TCEB2   | transcription elongation factor B (SIII), polypeptide 2    | (1 Nucleus      | transcription regulator | VH | 1.401  | 0.031 | -1.468 | 0.008 | -1.421 | 0.090 |
| gi_149642704_ref_NM_001099175.1_ | 618232    | MED15   | mediator complex subunit 15                                | Nucleus         | transcription regulator | H  | 1.398  | 0.028 | -1.943 | 0.040 | -1.368 | 0.143 |
| gi_119884881_ref_XM_606317.3_    | 527910    | SKIL    | SKI-like oncogene                                          | Nucleus         | transcription regulator | H  | 1.394  | 0.028 | 2.352  | 0.012 | 2.431  | 0.029 |
| gi_119879733_ref_XM_614853.3_    | 541166    | ETV5    | ets variant 5                                              | Nucleus         | transcription regulator | VH | 1.388  | 0.032 | -1.266 | 0.303 | -1.796 | 0.004 |
| gi_119907153_ref_NM_594648.3_    | 516493    | POU2F3  | POU class 2 homeobox 3                                     | Nucleus         | transcription regulator | L  | 1.373  | 0.036 | -1.129 | 0.718 | -1.566 | 0.023 |
| gi_119903024_ref_XM_581758.3_    | 505469    | FOXN3   | forkhead box N3                                            | Nucleus         | transcription regulator | M  | 1.373  | 0.037 | 1.271  | 1.180 | 1.690  | 0.450 |
| gi_119904250_ref_XM_001251674.1_ | 783869    | GTF3C5  | general transcription factor IIIC, polypeptide 5, 63kDa    | Nucleus         | transcription regulator | VH | 1.372  | 0.036 | -1.400 | 0.097 | -1.390 | 0.124 |
| gi_164448549_ref_NM_001024497.2_ | 507867    | ANKZF1  | ankyrin repeat and zinc finger domain containing 1         | Nucleus         | transcription regulator | VH | 1.371  | 0.041 | -1.629 | 0.010 | -1.725 | 0.006 |
| gi_119912402_ref_XM_866236.2_    | 614679    | HEXIM2  | hexamethylene bis-acetamide inducible 2                    | Nucleus         | transcription regulator | M  | 1.366  | 0.039 | -1.593 | 0.013 | -2.095 | 0.000 |
| gi_154707855_ref_NM_001099177.1_ | 618386    | TCF25   | transcription factor 25 (basic helix-loop-helix)           | Nucleus         | transcription regulator | VH | 1.365  | 0.037 | -1.075 | 0.865 | 1.026  | 1.193 |
| gi_115497343_ref_NM_001075627.1_ | 513544    | SAP30BP | SAP30 binding protein                                      | Nucleus         | transcription regulator | VH | 1.360  | 0.039 | -1.219 | 0.296 | -1.442 | 0.072 |
| gi_31342852_ref_NM_174097.2_     | 281270    | HOPX    | HOP homeobox                                               | Nucleus         | transcription regulator | N  | 1.356  | 0.043 | -1.138 | 0.443 | -1.611 | 0.011 |
| gi_119903596_ref_XM_614504.3_    | 534661    | PAX8    | paired box 8                                               | Nucleus         | transcription regulator | L  | 1.356  | 0.045 | 1.240  | 1.100 | 1.273  | 1.079 |
| gi_62751635_ref_NM_001015527.1_  | 505702    | GTF2F1  | general transcription factor IIF, polypeptide 1, 74kDa     | Nucleus         | transcription regulator | VH | 1.355  | 0.040 | -1.424 | 0.071 | -1.553 | 0.025 |
| gi_119919541_ref_XM_586187.3_    | 509260    | DEAF1   | deformed epidermal autoregulatory factor 1 (Drosophil      | Nucleus         | transcription regulator | H  | 1.355  | 0.043 | -1.206 | 0.444 | -1.103 | 0.732 |
| gi_134085849_ref_NM_001083382.1_ | 507180    | PHF5A   | PHD finger protein 5A                                      | Nucleus         | transcription regulator | VH | 1.352  | 0.041 | -1.605 | 0.012 | -1.945 | 0.001 |
| gi_77736090_ref_NM_001034572.1_  | 530409    | PHB     | PHB (includes EG)prohibitin                                | Nucleus         | transcription regulator | VH | 1.350  | 0.041 | -1.498 | 0.030 | -1.757 | 0.005 |
| gi_156120882_ref_NM_001102118.1_ | 528433    | DDX20   | DEAD (Asp-Glu-Ala-Asp) box polypeptide 20                  | Nucleus         | transcription regulator | VH | 1.349  | 0.041 | -1.069 | 0.905 | -1.154 | 0.659 |
| gi_119907824_ref_XM_583654.3_    | 507100    | SP1     | spleen focus forming virus (SFFV) proviral integration c   | Nucleus         | transcription regulator | VH | 1.349  | 0.042 | 1.111  | 1.209 | 1.256  | 1.335 |
| gi_119915255_ref_XM_612306.3_    | 533039    | SRF     | serum response factor (c-fos serum response element-       | Nucleus         | transcription regulator | VH | 1.346  | 0.043 | -1.461 | 0.054 | -1.263 | 0.334 |
| gi_157280010_ref_NM_001105051.1_ | 100125778 | RING1   | ring finger protein 1                                      | Nucleus         | transcription regulator | VH | 1.345  | 0.044 | -1.632 | 0.010 | -1.266 | 0.339 |
| gi_119907105_ref_XM_585092.3_    | 508330    | MLL     | myeloid/lymphoid or mixed-lineage leukemia (trithorax      | Nucleus         | transcription regulator | H  | 1.343  | 0.044 | -1.283 | 0.072 | 1.321  | 0.000 |
| gi_119892074_ref_XM_613160.3_    | 533680    | POU6F1  | POU class 6 homeobox 1                                     | Nucleus         | transcription regulator | M  | 1.341  | 0.053 | 1.654  | 0.300 | 3.000  | 0.005 |
| gi_119907798_ref_XM_585224.3_    | 508448    | PSMC3   | proteasome (prosome, macropain) 26S subunit, ATPas         | Nucleus         | transcription regulator | VH | 1.339  | 0.048 | -1.324 | 0.194 | -1.507 | 0.043 |
| gi_156121100_ref_NM_001102227.1_ | 539120    | VEZF1   | vascular endothelial zinc finger 1                         | Nucleus         | transcription regulator | H  | 1.339  | 0.045 | 1.126  | 1.237 | 1.181  | 1.339 |
| gi_6852489_gb_AW353499.1_AW35349 | 353105    | STAT6   | signal transducer and activator of transcription 6, interk | Nucleus         | transcription regulator | VH | 1.335  | 0.049 | -1.169 | 0.544 | 1.202  | 1.341 |
| gi_115497533_ref_NM_001075873.1_ | 525428    | E2F4    | E2F transcription factor 4, p107/p130-binding              | Nucleus         | transcription regulator | VH | 1.333  | 0.049 | -1.382 | 0.107 | -1.447 | 0.069 |
| gi_119902986_ref_XM_001253578.1_ | 785612    | GTF2A1  | general transcription factor IIA, 1, 19/37kDa              | Cytoplasm       | transcription regulator | H  | -3.004 | 0.049 | 1.745  | 0.210 | 1.628  | 0.544 |
| gi_149642758_ref_NM_001099186.1_ | 782690    | TCF7    | transcription factor 7 (T-cell specific, HMG-box)          | Nucleus         | transcription regulator | H  | -3.006 | 0.047 | 3.702  | 0.000 | 3.762  | 0.001 |
| gi_126722664_ref_NM_001082452.1_ | 539763    | PARP1   | poly (ADP-ribose) polymerase family, member 11             | unknown         | other                   | H  | -3.012 | 0.045 | 1.826  | 0.147 | 2.414  | 0.030 |
| gi_118151123_ref_NM_001078016.1_ | 538793    | ZNF238  | zinc finger protein 238                                    | Nucleus         | transcription regulator | H  | -3.027 | 0.042 | 2.290  | 0.016 | 2.459  | 0.026 |
| gi_77736300_ref_NM_001034678.1_  | 539547    | HES1    | hairly and enhancer of split 1, (Drosophila)               | Nucleus         | transcription regulator | H  | -3.027 | 0.041 | 5.906  | 0.000 | 12.323 | 0.000 |
| gi_114052622_ref_NM_001046113.1_ | 512254    | MEF2C   | myocyte enhancer factor 2C                                 | Nucleus         | transcription regulator | VH | -3.044 | 0.040 | 1.403  | 0.947 | 2.144  | 0.088 |
| gi_82697320_ref_NM_001037445.1_  | 503577    | DBP     | D site of albumin promoter (albumin D-box) binding prc     | Nucleus         | transcription regulator | M  | -3.085 | 0.039 | 1.835  | 0.147 | 2.068  | 0.113 |
| gi_155371838_ref_NM_001101054.1_ | 505691    | CDKN2C  | cyclin-dependent kinase inhibitor 2C (p18, inhibits CDK    | Nucleus         | transcription regulator | VH | -3.118 | 0.034 | 1.619  | 0.422 | 1.431  | 1.012 |
| gi_119888342_ref_XM_617930.3_    | 537747    | KLF7    | Kruppel-like factor 7 (ubiquitous)                         | Nucleus         | transcription regulator | H  | -3.374 | 0.018 | 3.378  | 0.000 | 3.028  | 0.005 |
| gi_119905625_ref_XM_581853.3_    | 505552    | MYT1    | myelin transcription factor 1                              | Nucleus         | transcription regulator | M  | -3.505 | 0.022 | -1.094 | 0.645 | -1.049 | 0.837 |
| gi_31340626_ref_NM_174725.2_     | 282711    | EPAS1   | endothelial PAS domain protein 1                           | Nucleus         | transcription regulator | M  | -3.575 | 0.013 | -1.279 | 0.250 | 2.332  | 0.042 |
| gi_119892029_ref_XM_873794.2_    | 317660    | HOCX9   | homeobox C9                                                | Nucleus         | transcription regulator | M  | -3.619 | 0.011 | 1.031  | 0.951 | 1.151  | 1.299 |
| gi_119905934_ref_XM_598075.3_    | 519845    | TOX2    | TOX high mobility group box family member 2                | Nucleus         | transcription regulator | M  | -3.625 | 0.011 | 1.150  | 1.091 | 1.598  | 0.588 |
| gi_119918399_ref_XR_027461.1_    | 781665    | IRF2BP2 | interferon regulatory factor 2 binding protein 2           | Nucleus         | transcription regulator | VH | -3.868 | 0.006 | 2.524  | 0.006 | 2.921  | 0.006 |
| gi_158519872_ref_NM_001110095.1_ | 782847    | ZHX1    | zinc fingers and homeoboxes 1                              | Nucleus         | transcription regulator | VH | -3.902 | 0.006 | 1.943  | 0.090 | 2.116  | 0.093 |
| gi_75832071_ref_NM_174730.2_     | 282846    | PYCARD  | PYD and CARD domain containing                             | Cytoplasm       | transcription regulator | H  | -3.906 | 0.006 | -2.311 | 0.014 | 2.603  | 0.015 |
| gi_156120990_ref_NM_001102172.1_ | 534475    | RFX2    | regulatory factor X, 2 (influences HLA class II expressi   | Nucleus         | transcription regulator | H  | -4.055 | 0.005 | 2.215  | 0.022 | 2.505  | 0.022 |
| gi_114050810_ref_NM_001046507.1_ | 613523    | EAF2    | ELL associated factor 2                                    | Nucleus         | transcription regulator | H  | -4.060 | 0.005 | -1.223 | 0.353 | -1.638 | 0.009 |
| gi_149944722_ref_NM_001099000.1_ | 517588    | GLI1    | GLI family zinc finger 1                                   | Nucleus         | transcription regulator | M  | -4.104 | 0.005 | 1.615  | 0.403 | 2.109  | 0.096 |
| gi_119921700_ref_XM_873620.2_    | 539139    | KLF9    | Kruppel-like factor 9                                      | Nucleus         | transcription regulator | M  | -4.111 | 0.005 | 1.895  | 0.104 | 3.042  | 0.005 |

|                                  |        |                  |                                                          |                 |                         |    |         |       |        |       |        |       |
|----------------------------------|--------|------------------|----------------------------------------------------------|-----------------|-------------------------|----|---------|-------|--------|-------|--------|-------|
| gi_62751708_ref_NM_001015520.1_  | 505233 | LASS4            | LAG1 homolog, ceramide synthase 4                        | Cytoplasm       | transcription regulator | M  | -4.131  | 0.004 | 1.624  | 0.349 | 4.282  | 0.000 |
| gi_119911320_ref_XM_001256793.1_ | 790276 | ZNF256           | zinc finger protein 256                                  | Nucleus         | transcription regulator | H  | -4.273  | 0.003 | 1.608  | 0.429 | 2.090  | 0.105 |
| gi_119914354_ref_XM_001250711.1_ | 782819 | ZNF35            | zinc finger protein 35                                   | Nucleus         | transcription regulator | L  | -4.450  | 0.003 | 1.118  | 1.202 | 1.173  | 1.332 |
| gi_119879546_ref_XM_001251104.1_ | 540789 | PARP14           | poly (ADP-ribose) polymerase family, member 14           | Cytoplasm       | other                   | H  | -4.897  | 0.001 | 4.644  | 0.000 | 5.496  | 0.000 |
| gi_119906406_ref_XM_616463.3_    | 536336 | ST18             | suppression of tumorigenicity 18 (breast carcinoma)      | Nucleus         | transcription regulator | M  | -4.978  | 0.001 | 1.805  | 0.156 | 3.084  | 0.004 |
| gi_114051376_ref_NM_001046050.1_ | 510244 | CDKN2D           | cyclin-dependent kinase inhibitor 2D (p19, inhibits CDK) | Nucleus         | transcription regulator | H  | -4.994  | 0.001 | -1.342 | 0.110 | 1.030  | 1.096 |
| gi_156139064_ref_NM_001102373.1_ | 613740 | HOXC4            | homeobox C4                                              | Nucleus         | transcription regulator | M  | -5.003  | 0.001 | 1.370  | 0.883 | 1.684  | 0.431 |
| gi_119920266_ref_XM_584087.3_    | 538983 | TAF9B            | TAF9B RNA polymerase II, TATA box binding protein (T     | Nucleus         | transcription regulator | VH | -5.401  | 0.001 | 2.948  | 0.000 | 3.124  | 0.004 |
| gi_119914390_ref_XM_593599.3_    | 515564 | ZNF197           | zinc finger protein 197                                  | Nucleus         | transcription regulator | H  | -5.491  | 0.000 | 1.844  | 0.136 | 2.376  | 0.036 |
| gi_119911158_ref_XM_001254867.1_ | 509810 | ZNF256           | zinc finger protein 256                                  | Nucleus         | transcription regulator | M  | -5.493  | 0.001 | 1.040  | 1.065 | 1.286  | 1.276 |
| gi_156121204_ref_NM_001102280.1_ | 614517 | GAS7             | growth arrest-specific 7                                 | Cytoplasm       | transcription regulator | VH | -5.542  | 0.000 | 1.375  | 0.996 | 1.621  | 0.574 |
| gi_76668819_ref_XM_864611.1_     | 537223 | SIM1             | single-minded homolog 1 (Drosophila)                     | Nucleus         | transcription regulator | M  | -6.813  | 0.000 | 2.914  | 0.000 | 2.196  | 0.067 |
| gi_119917624_ref_XM_614245.3_    | 534470 | LBX1             | ladybird homeobox 1                                      | Nucleus         | transcription regulator | M  | -6.966  | 0.000 | -1.097 | 0.392 | 1.003  | 0.796 |
| gi_115496541_ref_NM_001076531.1_ | 767586 | KANK2            | KN motif and ankyrin repeat domains 2                    | Nucleus         | transcription regulator | H  | -7.103  | 0.000 | 1.597  | 0.441 | 2.209  | 0.066 |
| gi_115496619_ref_NM_001075708.1_ | 515334 | ZNF350           | zinc finger protein 350                                  | Nucleus         | transcription regulator | M  | -7.564  | 0.000 | 1.136  | 0.944 | -1.129 | 0.402 |
| gi_149642786_ref_NM_001099152.1_ | 616148 | LBH              | limb bud and heart development homolog (mouse)           | Nucleus         | transcription regulator | VH | -7.566  | 0.000 | 1.514  | 0.664 | 2.657  | 0.012 |
| gi_125991955_ref_NM_001081613.1_ | 540676 | IKZF3            | IKAROS family zinc finger 3 (Aiolos)                     | Nucleus         | transcription regulator | M  | -7.714  | 0.000 | 2.715  | 0.003 | 2.229  | 0.063 |
| gi_119910890_ref_XR_028348.1_    | 537103 | ZNF175           | zinc finger protein 175                                  | Nucleus         | transcription regulator | M  | -7.866  | 0.000 | 1.110  | 1.210 | 1.434  | 0.948 |
| gi_31340727_ref_NM_174687.2_     | 282591 | ASB15            | ankyrin repeat and SOCS box-containing 15                | Nucleus         | transcription regulator | M  | -7.957  | 0.000 | -1.069 | 0.870 | 1.071  | 1.214 |
| gi_149773516_ref_NM_001099106.1_ | 540313 | ETS1             | v-ets erythroblastosis virus E26 oncogene homolog 1 (    | Nucleus         | transcription regulator | VH | -8.655  | 0.000 | -1.299 | 0.127 | -1.439 | 0.066 |
| gi_115496321_ref_NM_001075915.1_ | 528475 | POU2AF1          | POU class 2 associating factor 1                         | Nucleus         | transcription regulator | VH | -8.996  | 0.000 | 1.633  | 0.406 | 1.551  | 0.707 |
| gi_119900560_ref_XM_618574.3_    | 538371 | PAX5             | paired box 5                                             | Nucleus         | transcription regulator | VH | -9.835  | 0.000 | 1.096  | 1.206 | 1.617  | 0.567 |
| gi_119902037_ref_XM_864937.2_    | 535307 | NEO1             | neogenin homolog 1 (chicken)                             | Plasma Membrane | transcription regulator | M  | -9.887  | 0.000 | 1.780  | 0.135 | 1.984  | 0.145 |
| gi_115497895_ref_NM_001075612.1_ | 513316 | KCNIP3           | Kv channel interacting protein 3, calsennilin            | Nucleus         | transcription regulator | M  | -10.426 | 0.000 | 1.780  | 0.156 | 2.895  | 0.007 |
| gi_119911185_ref_XM_001256592.1_ | 798989 | ZNF211           | zinc finger protein 211                                  | Nucleus         | transcription regulator | H  | -10.771 | 0.000 | -1.136 | 0.588 | -1.073 | 0.857 |
| gi_119915881_ref_XM_587261.3_    | 539454 | GCM2             | glial cells missing homolog 2 (Drosophila)               | Nucleus         | transcription regulator | M  | -10.783 | 0.000 | 1.200  | 1.218 | 1.374  | 1.060 |
| gi_94966920_ref_NM_001040563.1_  | 539276 | HTATIP2          | HIV-1 Tat interactive protein 2, 30kDa                   | Nucleus         | transcription regulator | M  | -11.018 | 0.000 | 1.147  | 1.116 | 1.270  | 1.241 |
| gi_119895769_ref_XM_617891.3_    | 537712 | EBF1             | early B-cell factor 1                                    | Nucleus         | transcription regulator | VH | -11.159 | 0.000 | 1.459  | 0.788 | 1.462  | 0.928 |
| gi_156120434_ref_NM_001101893.1_ | 508025 | ZNF423           | zinc finger protein 423                                  | Nucleus         | transcription regulator | M  | -13.720 | 0.000 | 1.342  | 0.966 | 1.313  | 1.228 |
| gi_119910807_ref_XM_001252761.1_ | 784460 | SP1B             | Spi-B transcription factor (Spi-1/PU.1 related)          | Nucleus         | transcription regulator | H  | -17.754 | 0.000 | 1.380  | 0.795 | 2.313  | 0.045 |
| gi_164451497_ref_NM_001024565.2_ | 538609 | HEYL             | hairly/enhancer-of-split related with YRPW motif-like    | Nucleus         | transcription regulator | H  | -26.514 | 0.000 | 1.804  | 0.168 | 2.719  | 0.010 |
| gi_156120738_ref_NM_001102046.1_ | 517861 | POU6F2 (includes | POU class 6 homeobox 2                                   | Nucleus         | transcription regulator | H  | -27.841 | 0.000 | 1.283  | 1.141 | 1.826  | 0.279 |
| gi_119900339_ref_XM_614789.3_    | 534869 | KANK1            | KN motif and ankyrin repeat domains 1                    | Nucleus         | transcription regulator | VH | -34.265 | 0.000 | 3.082  | 0.000 | 2.505  | 0.022 |
| gi_119890798_ref_XM_615498.3_    | 535415 | HDAC9 (includes  | histone deacetylase 9                                    | Nucleus         | transcription regulator | H  | -36.787 | 0.000 | 7.269  | 0.000 | 18.700 | 0.000 |
| gi_119893570_ref_XM_615475.3_    | 535399 | LEF1             | lymphoid enhancer-binding factor 1                       | Nucleus         | transcription regulator | VH | -60.452 | 0.000 | 3.948  | 0.000 | 3.572  | 0.001 |
| gi_62460541_ref_NM_001014923.1_  | 514006 | NFE2             | nuclear factor (erythroid-derived 2), 45kDa              | Nucleus         | transcription regulator | H  | -78.828 | 0.000 | 1.191  | 1.237 | 1.244  | 1.298 |

**Table S7B: Translation**

| SEQ_ID                           | Entrez gene ID | Symbol           | Entrez Gene Name                                               | Location            | Type                  | Predicted BL20 expression level | FC        |            | FDR        |                | FC         |                | FDR |  |
|----------------------------------|----------------|------------------|----------------------------------------------------------------|---------------------|-----------------------|---------------------------------|-----------|------------|------------|----------------|------------|----------------|-----|--|
|                                  |                |                  |                                                                |                     |                       |                                 | FC BLvTBL | FDR BLvTBL | TBLvTBL24h | FDR TBLvTBL24h | TBLvTBL48h | FDR TBLvTBL48h |     |  |
| gi_148233315_ref_NM_001098165.1_ | 100048947      | RNASEL           | ribonuclease L (2',5'-oligoadenylate synthetase-depr           | Cytoplasm           | enzyme                | M                               | 11.966    | 0.000      | -1.284     | 0.255          | -1.357     | 0.161          |     |  |
| gi_119923325_ref_XM_584997.3_    | 508245         | RNASET2          | ribonuclease T2                                                | Extracellular Space | enzyme                | H                               | 4.757     | 0.000      | 1.076      | 1.192          | 1.338      | 1.227          |     |  |
| gi_147903999_ref_NM_001098126.1_ | 614429         | YBX2             | Y box binding protein 2                                        | Cytoplasm           | translation regulator | M                               | 3.082     | 0.000      | 2.191      | 0.024          | 2.271      | 0.054          |     |  |
| gi_134085871_ref_NM_001083384.1_ | 507417         | ABTB1            | ankyrin repeat and BTB (POZ) domain containing 1               | Cytoplasm           | translation regulator | H                               | 2.904     | 0.000      | -1.961     | 0.000          | -1.013     | 1.103          |     |  |
| gi_114052031_ref_NM_001046387.1_ | 534734         | MR1I             | methylthioribose-1-phosphate isomerase homolog (S. cerevisiae) | Cytoplasm           | translation regulator | H                               | 2.002     | 0.001      | -1.576     | 0.016          | -2.042     | 0.000          |     |  |
| gi_115495424_ref_NM_001075874.1_ | 525521         | RPUSD1           | RNA pseudouridylylate synthase domain containing 1             | unknown             | enzyme                | H                               | 1.941     | 0.001      | -1.422     | 0.073          | -1.335     | 0.198          |     |  |
| gi_149944724_ref_NM_001099185.1_ | 782674         | NOL6             | nucleolar protein family 6 (RNA-associated)                    | Nucleus             | other                 | H                               | 1.888     | 0.001      | -2.634     | 0.000          | -2.754     | 0.000          |     |  |
| gi_126165253_ref_NM_001081735.1_ | 540139         | REXO2            | REX2, RNA exonuclease 2 homolog (S. cerevisiae)                | Cytoplasm           | enzyme                | VH                              | 1.749     | 0.002      | -1.304     | 0.239          | -1.682     | 0.009          |     |  |
| gi_119893809_ref_XM_613340.3_    | 540831         | RBM47            | RNA binding motif protein 47                                   | unknown             | other                 | M                               | 1.700     | 0.004      | 1.060      | 1.188          | 1.027      | 1.100          |     |  |
| gi_134085929_ref_NM_001083399.1_ | 509932         | MRTO4            | mRNA turnover 4 homolog (S. cerevisiae)                        | Cytoplasm           | other                 | H                               | 1.686     | 0.003      | -1.812     | 0.001          | -1.988     | 0.001          |     |  |
| gi_119914241_ref_XM_001252033.1_ | 784766         | RBMS3            | RNA binding motif, single stranded interacting protein         | unknown             | other                 | L                               | 1.682     | 0.006      | 2.099      | 0.042          | 1.546      | 0.738          |     |  |
| gi_115497695_ref_NM_001075589.1_ | 512925         | RRP1             | ribosomal RNA processing 1 homolog (S. cerevisiae)             | Nucleus             | other                 | VH                              | 1.671     | 0.004      | -1.554     | 0.020          | -1.725     | 0.006          |     |  |
| gi_119911687_ref_XM_883226.2_    | 531049         | KIAA0664         | KIAA0664                                                       | Cytoplasm           | translation regulator | H                               | 1.671     | 0.005      | -2.295     | 0.000          | -1.562     | 0.023          |     |  |
| gi_114051909_ref_NM_001045955.1_ | 507065         | RBM19            | RNA binding motif protein 19                                   | Nucleus             | other                 | VH                              | 1.635     | 0.006      | -1.316     | 0.206          | -1.442     | 0.072          |     |  |
| gi_156121190_ref_NM_001102273.1_ | 614025         | RRP9             | ribosomal RNA processing 9, small subunit (SSU) proc           | Nucleus             | other                 | VH                              | 1.621     | 0.006      | -2.021     | 0.000          | -2.028     | 0.000          |     |  |
| gi_119913741_ref_XM_606001.3_    | 527607         | EFTUD1           | elongation factor Tu GTP binding domain containing 1           | Cytoplasm           | translation regulator | VH                              | 1.547     | 0.008      | -1.158     | 0.596          | -1.388     | 0.121          |     |  |
| gi_41386714_ref_NM_174830.1_     | 286811         | EIF6             | eukaryotic translation initiation factor 6                     | Cytoplasm           | translation regulator | VH                              | 1.547     | 0.008      | -1.642     | 0.010          | -1.721     | 0.007          |     |  |
| gi_119889249_ref_XM_581374.3_    | 505134         | ADAR             | adenosine deaminase, RNA-specific                              | Nucleus             | enzyme                | H                               | 1.521     | 0.010      | 1.366      | 1.070          | 1.647      | 0.543          |     |  |
| gi_77735812_ref_NM_001034429.1_  | 512886         | RNASEK           | ribonuclease, RNase K                                          | unknown             | peptidase             | VH                              | 1.518     | 0.011      | 1.054      | 1.143          | -1.013     | 1.078          |     |  |
| gi_134085616_ref_NM_001083464.1_ | 532824         | EEFSEC           | eukaryotic elongation factor, selenocysteine-tRNA-spec         | Cytoplasm           | translation regulator | H                               | 1.513     | 0.012      | -1.513     | 0.032          | -1.697     | 0.008          |     |  |
| gi_83523772_ref_NM_174788.2_     | 286853         | RPLP2            | ribosomal protein, large, P2                                   | Cytoplasm           | other                 | VH                              | 1.506     | 0.013      | -1.469     | 0.041          | -1.411     | 0.102          |     |  |
| gi_45430014_ref_NM_205794.1_     | 404130         | EIF2C2           | eukaryotic translation initiation factor 2C, 2                 | Cytoplasm           | translation regulator | VH                              | 1.504     | 0.013      | -1.288     | 0.272          | -1.139     | 0.697          |     |  |
| gi_75812945_ref_NM_001033622.1_  | 404165         | NOP56            | NOP56 ribonucleoprotein homolog (yeast)                        | Nucleus             | other                 | VH                              | 1.495     | 0.012      | -1.283     | 0.265          | -1.388     | 0.124          |     |  |
| gi_119910146_ref_XR_028278.1_    | 513171         | EDC4             | enhancer of mRNA decapping 4                                   | unknown             | other                 | H                               | 1.492     | 0.014      | -1.663     | 0.007          | -1.659     | 0.010          |     |  |
| gi_119891303_ref_XM_583691.3_    | 507132         | RBM28            | RNA binding motif protein 28                                   | Nucleus             | other                 | H                               | 1.490     | 0.015      | -1.407     | 0.081          | -2.114     | 0.000          |     |  |
| gi_77404208_ref_NM_001034044.1_  | 286819         | EIF4A2           | eukaryotic translation initiation factor 4A, isoform 2         | Cytoplasm           | translation regulator | VH                              | 1.483     | 0.015      | 1.059      | 1.155          | -1.091     | 0.840          |     |  |
| gi_156120514_ref_NM_001101933.1_ | 510820         | TSR1             | TSR1, 20S rRNA accumulation, homolog (S. cerevisiae)           | unknown             | other                 | VH                              | 1.464     | 0.017      | -1.294     | 0.241          | -1.486     | 0.051          |     |  |
| gi_31342599_ref_NM_174204.2_     | 281551         | TSMF (includes E | Ts translation elongation factor, mitochondrial                | Cytoplasm           | translation regulator | H                               | 1.461     | 0.017      | -1.516     | 0.024          | -2.047     | 0.000          |     |  |
| gi_118601775_ref_NM_001079588.1_ | 511560         | IMP3             | IMP3, U3 small nucleolar ribonucleoprotein, homolog (          | Cytoplasm           | other                 | H                               | 1.455     | 0.018      | -1.623     | 0.010          | -1.991     | 0.001          |     |  |

|                                  |           |                  |                                                            |                     |                         |    |          |       |        |       |        |       |
|----------------------------------|-----------|------------------|------------------------------------------------------------|---------------------|-------------------------|----|----------|-------|--------|-------|--------|-------|
| gi_94966953_ref_NM_001040581.1_  | 615178    | RPS21            | ribosomal protein S21                                      | Cytoplasm           | other                   | VH | 1.453    | 0.021 | -1.489 | 0.032 | -1.300 | 0.233 |
| gi_119906215_ref_XM_594628.3_    | 516473    | EEF1D            | eukaryotic translation elongation factor 1 delta (guanine) | Cytoplasm           | translation regulator   | VH | 1.441    | 0.021 | -1.617 | 0.011 | -1.403 | 0.111 |
| gi_115497461_ref_NM_001076143.1_ | 539052    | EIF3J            | eukaryotic translation initiation factor 3, subunit J      | Cytoplasm           | translation regulator   | VH | 1.439    | 0.021 | -1.408 | 0.063 | -1.725 | 0.006 |
| gi_119892449_ref_XM_001252988.1_ | 538820    | PAN2 (includes E | PAN2 poly(A) specific ribonuclease subunit homolog (S      | Cytoplasm           | peptidase               | VH | 1.421    | 0.025 | 1.249  | 1.253 | 1.075  | 1.258 |
| gi_78369251_ref_NM_001035361.1_  | 526135    | RBMS1            | RNA binding motif, single stranded interacting protein 1   | Nucleus             | other                   | VH | 1.415    | 0.025 | 1.350  | 1.106 | 1.166  | 1.332 |
| gi_114052113_ref_NM_001046375.1_ | 534228    | PRPF6            | PRP6 pre-mRNA processing factor 6 homolog (S. cere         | Nucleus             | transcription regulator | VH | 1.415    | 0.026 | -1.062 | 0.902 | -1.072 | 0.915 |
| gi_134085778_ref_NM_001083474.1_ | 534063    | EIF2B3           | eukaryotic translation initiation factor 2B, subunit 3     | Cytoplasm           | translation regulator   | VH | 1.404    | 0.027 | -1.003 | 1.085 | -1.400 | 0.117 |
| gi_115497947_ref_NM_001075481.1_ | 510956    | RRS1             | RRS1 ribosome biogenesis regulator homolog (S. cere        | Nucleus             | other                   | VH | 1.398    | 0.029 | -1.557 | 0.020 | -1.963 | 0.001 |
| gi_84000148_ref_NM_001038085.1_  | 511723    | RPP38            | ribonuclease P/MRP 38kDa subunit                           | Nucleus             | enzyme                  | H  | 1.372    | 0.036 | -1.586 | 0.015 | -1.961 | 0.001 |
| gi_139948859_ref_NM_001083679.1_ | 513598    | SMG5             | Smg-5 homolog, nonsense mediated mRNA decay fact           | Nucleus             | other                   | VH | 1.370    | 0.038 | -2.320 | 0.000 | -1.432 | 0.075 |
| gi_77736196_ref_NM_001034625.1_  | 535056    | RPL8             | ribosomal protein L8                                       | Cytoplasm           | other                   | VH | 1.362    | 0.037 | -1.593 | 0.013 | -1.549 | 0.028 |
| gi_119881238_ref_XM_001251995.1_ | 783760    | EIF2B5           | eukaryotic translation initiation factor 2B, subunit 5     | Cytoplasm           | translation regulator   | VH | 1.361    | 0.038 | -1.054 | 0.953 | -1.437 | 0.080 |
| gi_62460451_ref_NM_001014876.1_  | 508948    | RSL1D1           | ribosomal L1 domain containing 1                           | Cytoplasm           | other                   | VH | 1.349    | 0.042 | -1.224 | 0.420 | -1.409 | 0.104 |
| gi_156718145_ref_NM_001103108.1_ | 100125222 | RAVER1           | ribonucleoprotein, PTB-binding 1                           | Nucleus             | other                   | VH | 1.330    | 0.049 | -1.677 | 0.006 | -1.493 | 0.048 |
| gi_77736378_ref_NM_001034718.1_  | 540982    | GLE1             | GLE1 RNA export mediator homolog (yeast)                   | Nucleus             | other                   | VH | 1.320    | 0.054 | -1.165 | 0.617 | -1.426 | 0.096 |
| gi_156121354_ref_NM_001102356.1_ | 789999    | EIF3B            | eukaryotic translation initiation factor 3, subunit B      | Cytoplasm           | translation regulator   | VH | 1.318    | 0.053 | -1.273 | 0.286 | -1.326 | 0.216 |
| gi_119895025_ref_XM_610805.3_    | 532293    | BRUNOL5          | bruno-like 5, RNA binding protein (Drosophila)             | unknown             | other                   | M  | -3.310   | 0.022 | 1.290  | 1.217 | 1.684  | 0.477 |
| gi_119923409_ref_XM_613436.3_    | 540852    | SAMD4A           | sterile alpha motif domain containing 4A                   | Cytoplasm           | translation regulator   | H  | -3.339   | 0.021 | 1.092  | 1.215 | 1.230  | 1.342 |
| gi_119917775_ref_XM_603772.3_    | 525419    | RBM20            | RNA binding motif protein 20                               | unknown             | other                   | M  | -3.563   | 0.013 | 1.414  | 0.838 | 1.575  | 0.650 |
| gi_119902448_ref_XM_596374.3_    | 518188    | RBPMS2           | RNA binding protein with multiple splicing 2               | unknown             | other                   | M  | -4.875   | 0.001 | 1.232  | 1.248 | 1.332  | 1.248 |
| gi_114052323_ref_NM_001046535.1_ | 614417    | RBPMS            | RNA binding protein with multiple splicing                 | unknown             | other                   | VH | -6.600   | 0.000 | -1.291 | 0.234 | 2.448  | 0.028 |
| gi_119901747_ref_XM_596135.3_    | 517953    | RPS6KA2          | ribosomal protein S6 kinase, 90kDa, polypeptide 2          | Nucleus             | kinase                  | H  | -7.201   | 0.000 | 1.119  | 1.214 | 1.087  | 1.149 |
| gi_119912092_ref_XM_595012.3_    | 516853    | IGF2BP1          | insulin-like growth factor 2 mRNA binding protein 1        | Cytoplasm           | translation regulator   | M  | -9.065   | 0.000 | 1.226  | 1.242 | 1.834  | 0.272 |
| gi_31341580_ref_NM_174594.2_     | 282341    | RNASE6           | ribonuclease, RNase A family, k6                           | Extracellular Space | enzyme                  | H  | -11.457  | 0.000 | 14.633 | 0.000 | 18.983 | 0.000 |
| gi_119920009_ref_XM_601830.3_    | 523530    | NXF3             | nuclear RNA export factor 3                                | Nucleus             | transporter             | VH | -166.634 | 0.000 | 1.449  | 0.683 | 1.393  | 0.942 |
