# Supplementary material for: A Bovine Lymphosarcoma Cell Line Infected with Theileria annulata Exhibits an Irreversible Reconfiguration of Host Cell Gene Expression
Source: PubMed Central journal article supplement (PMC3694138; doi:10.1371/journal.pone.0066833), 2013-06-26
Supplement: pone.0066833.s010.pdf [file pone.0066833.s010.pdf]

**Table S8: Transcription regulators predicted to be highly expressed in BL20**

| SEQ_ID                           | Entrez gene ID | Symbol           | Entrez Gene Name                                          | Location  | Type                    | Predicted BL20 expression level | FC        |            | FDR           |                |               |                |
|----------------------------------|----------------|------------------|-----------------------------------------------------------|-----------|-------------------------|---------------------------------|-----------|------------|---------------|----------------|---------------|----------------|
|                                  |                |                  |                                                           |           |                         |                                 | FC BLVtBL | FDR BLVtBL | FC TBLvTBL24h | FDR TBLvTBL24h | FC TBLvTBL48h | FDR TBLvTBL48h |
| gi_62460541_ref_NM_001014923.1_  | 514006         | NEF2             | nuclear factor (erythroid-derived 2), 45kDa               | Nucleus   | transcription regulator | H                               | -78.828   | 0.000      | 1.191         | 1.237          | 1.244         | 1.298          |
| gi_119893570_ref_XM_615475.3_    | 535399         | LEF1             | lymphoid enhancer-binding factor 1                        | Nucleus   | transcription regulator | VH                              | -60.452   | 0.000      | 3.948         | 0.000          | 3.572         | 0.001          |
| gi_119890798_ref_XM_615498.3_    | 535415         | HDAC9 (includes  | histone deacetylase 9                                     | Nucleus   | transcription regulator | H                               | -36.787   | 0.000      | 7.269         | 0.000          | 18.700        | 0.000          |
| gi_119900339_ref_XM_614789.3_    | 534869         | KANK1            | KN motif and ankyrin repeat domains 1                     | Nucleus   | transcription regulator | VH                              | -34.265   | 0.000      | 3.082         | 0.000          | 2.505         | 0.022          |
| gi_156120738_ref_NM_001102046.1_ | 517861         | POU6F2 (includes | POU class 6 homeobox 2                                    | Nucleus   | transcription regulator | H                               | -27.841   | 0.000      | 1.283         | 1.141          | 1.826         | 0.279          |
| gi_164451497_ref_NM_001024565.2_ | 538609         | HEYL             | hairly/enhancer-of-split related with YRPW motif-like     | Nucleus   | transcription regulator | H                               | -26.514   | 0.000      | 1.804         | 0.168          | 2.719         | 0.010          |
| gi_119910807_ref_NM_001252761.1_ | 784460         | SPIB             | Spi-B transcription factor (Spi-1/PU.1 related)           | Nucleus   | transcription regulator | H                               | -17.754   | 0.000      | 1.380         | 0.795          | 2.313         | 0.045          |
| gi_119895769_ref_XM_617891.3_    | 537712         | EBF1             | early B-cell factor 1                                     | Nucleus   | transcription regulator | VH                              | -11.159   | 0.000      | 1.459         | 0.788          | 1.462         | 0.928          |
| gi_119911185_ref_XM_001256592.1_ | 789989         | ZNF211           | zinc finger protein 211                                   | Nucleus   | transcription regulator | H                               | -10.771   | 0.000      | -1.136        | 0.588          | -1.073        | 0.857          |
| gi_119900560_ref_XM_618574.3_    | 538371         | PAX5             | paired box 5                                              | Nucleus   | transcription regulator | VH                              | -9.835    | 0.000      | 1.096         | 1.206          | 1.617         | 0.567          |
| gi_115496321_ref_NM_001075915.1_ | 528475         | POU2AF1          | POU class 2 associating factor 1                          | Nucleus   | transcription regulator | VH                              | -8.996    | 0.000      | 1.633         | 0.406          | 1.551         | 0.707          |
| gi_149773516_ref_NM_001099106.1_ | 540313         | ETS1             | v-ets erythroblastosis virus E26 oncogene homolog 1 (     | Nucleus   | transcription regulator | VH                              | -8.655    | 0.000      | -1.299        | 0.127          | -1.439        | 0.066          |
| gi_149642786_ref_NM_001099152.1_ | 616148         | LBH              | limb bud and heart development homolog (mouse)            | Nucleus   | transcription regulator | VH                              | -7.566    | 0.000      | 1.514         | 0.664          | 2.657         | 0.012          |
| gi_115496541_ref_NM_001076531.1_ | 767586         | KANK2            | KN motif and ankyrin repeat domains 2                     | Nucleus   | transcription regulator | H                               | -7.103    | 0.000      | 1.597         | 0.441          | 2.209         | 0.066          |
| gi_156121204_ref_NM_001102280.1_ | 614517         | GA57             | growth arrest-specific 7                                  | Cytoplasm | transcription regulator | VH                              | -5.542    | 0.000      | 1.375         | 0.996          | 1.621         | 0.574          |
| gi_119914390_ref_XM_593599.3_    | 515564         | ZNF197           | zinc finger protein 197                                   | Nucleus   | transcription regulator | H                               | -5.491    | 0.000      | 1.844         | 0.136          | 2.376         | 0.036          |
| gi_119920266_ref_XM_584087.3_    | 538983         | TAF9B            | TAF9B RNA polymerase II, TATA box binding protein (T      | Nucleus   | transcription regulator | VH                              | -5.401    | 0.001      | 2.948         | 0.000          | 3.124         | 0.004          |
| gi_114051376_ref_NM_001046050.1_ | 510244         | CDKN2D           | cyclin-dependent kinase inhibitor 2D (p19, inhibits CDK   | Nucleus   | transcription regulator | H                               | -4.994    | 0.001      | -1.342        | 0.110          | 1.030         | 1.096          |
| gi_119911320_ref_XM_001256793.1_ | 790276         | ZNF256           | zinc finger protein 256                                   | Nucleus   | transcription regulator | H                               | -4.273    | 0.003      | 1.608         | 0.429          | 2.090         | 0.105          |
| gi_114050810_ref_NM_001046507.1_ | 613523         | EAF2             | ELL associated factor 2                                   | Nucleus   | transcription regulator | H                               | -4.060    | 0.005      | -1.223        | 0.353          | -1.638        | 0.009          |
| gi_156120990_ref_NM_001102172.1_ | 534475         | RFX2             | regulatory factor X, 2 (influences HLA class II expressio | Nucleus   | transcription regulator | H                               | -4.055    | 0.005      | 2.215         | 0.022          | 2.505         | 0.022          |
| gi_75832071_ref_NM_174730.2_     | 282846         | PYCARD           | PYD and CARD domain containing                            | Cytoplasm | transcription regulator | H                               | -3.906    | 0.006      | 2.311         | 0.014          | 2.603         | 0.015          |
| gi_158519872_ref_NM_001110095.1_ | 782847         | ZHX1             | zinc fingers and homeoboxes 1                             | Nucleus   | transcription regulator | VH                              | -3.902    | 0.006      | 1.943         | 0.090          | 2.116         | 0.093          |
| gi_119918399_ref_XR_027461.1_    | 781665         | IRF2BP2          | interferon regulatory factor 2 binding protein 2          | Nucleus   | transcription regulator | VH                              | -3.868    | 0.006      | 2.524         | 0.006          | 2.921         | 0.006          |
| gi_119888342_ref_XM_617930.3_    | 537747         | KLF7             | Kruppel-like factor 7 (ubiquitous)                        | Nucleus   | transcription regulator | H                               | -3.374    | 0.018      | 3.378         | 0.000          | 3.028         | 0.005          |
| gi_155371838_ref_NM_001101054.1_ | 505691         | CDKN2C           | cyclin-dependent kinase inhibitor 2C (p18, inhibits CDK   | Nucleus   | transcription regulator | VH                              | -3.118    | 0.034      | 1.619         | 0.422          | 1.431         | 1.012          |
| gi_114052622_ref_NM_001046113.1_ | 512254         | MEF2C            | myocyte enhancer factor 2C                                | Nucleus   | transcription regulator | VH                              | -3.044    | 0.040      | 1.403         | 0.947          | 2.144         | 0.088          |
| gi_77736300_ref_NM_001034678.1_  | 539547         | HES1             | hairly and enhancer of split 1, (Drosophila)              | Nucleus   | transcription regulator | H                               | -3.027    | 0.041      | 5.906         | 0.000          | 12.323        | 0.000          |
| gi_118151123_ref_NM_001078016.1_ | 538793         | ZNF238           | zinc finger protein 238                                   | Nucleus   | transcription regulator | H                               | -3.027    | 0.042      | 2.290         | 0.016          | 2.459         | 0.026          |
| gi_149642758_ref_NM_001099186.1_ | 782690         | TCF7             | transcription factor 7 (T-cell specific, HMG-box)         | Nucleus   | transcription regulator | H                               | -3.006    | 0.047      | 3.702         | 0.000          | 3.762         | 0.001          |
| gi_119902986_ref_XM_001253578.1_ | 785612         | GTF2A1           | general transcription factor IIA, 1, 19/37kDa             | Cytoplasm | transcription regulator | H                               | -3.004    | 0.049      | 1.745         | 0.210          | 1.628         | 0.544          |
| gi_119909958_ref_XM_001251963.1_ | 523815         | CBFA2T3          | core-binding factor, runt domain, alpha subunit 2; trans  | Nucleus   | transcription regulator | VH                              | -2.949    | 0.053      | 2.170         | 0.028          | 2.319         | 0.044          |
| gi_77736282_ref_NM_001034669.1_  | 539244         | ASB2             | ankyrin repeat and SOCS box-containing 2                  | Nucleus   | transcription regulator | H                               | -2.938    | 0.055      | 1.090         | 1.168          | 2.502         | 0.022          |
| gi_115497505_ref_NM_001076222.1_ | 540474         | LMCD1            | LIM and cysteine-rich domains 1                           | Cytoplasm | transcription regulator | H                               | -2.917    | 0.054      | 1.106         | 1.215          | -1.230        | 0.404          |
| gi_41386732_ref_NM_177490.1_     | 280961         | ZFX              | zinc finger protein, X-linked                             | Nucleus   | transcription regulator | VH                              | -2.914    | 0.055      | 1.871         | 0.131          | 1.761         | 0.354          |
| gi_119916759_ref_XM_585540.3_    | 508720         | CIITA            | class II, major histocompatibility complex, transactivat  | Nucleus   | transcription regulator | H                               | -2.903    | 0.064      | -2.235        | 0.000          | -1.446        | 0.068          |
| gi_115497499_ref_NM_001075894.1_ | 527124         | CDKN2B           | cyclin-dependent kinase inhibitor 2B (p15, inhibits CDK   | Nucleus   | transcription regulator | H                               | -2.797    | 0.087      | 1.564         | 0.393          | 2.129         | 0.089          |
| gi_119889385_ref_XM_590074.3_    | 539884         | RFX5             | regulatory factor X, 5 (influences HLA class II expressio | Nucleus   | transcription regulator | H                               | -2.768    | 0.083      | 1.860         | 0.136          | 1.737         | 0.389          |
| gi_119932393_ref_XM_001250820.1_ | 786432         | MED7 (includes E | mediator complex subunit 7                                | Nucleus   | transcription regulator | H                               | -2.757    | 0.090      | 2.167         | 0.025          | 3.450         | 0.001          |
| gi_40538781_ref_NM_175050.1_     | 317776         | MYB (includes EC | v-myb myeloblastosis viral oncogene homolog (avian)       | Nucleus   | transcription regulator | VH                              | -2.745    | 0.090      | 1.407         | 0.932          | -1.210        | 0.464          |
| gi_139949110_ref_NM_001083769.1_ | 614909         | IRF8             | interferon regulatory factor 8                            | Nucleus   | transcription regulator | VH                              | -2.717    | 0.099      | -2.021        | 0.000          | -2.819        | 0.000          |
| gi_125991921_ref_NM_001081583.1_ | 508893         | TLE4             | transducin-like enhancer of split 4 (E(sp1) homolog, Dr   | Nucleus   | transcription regulator | VH                              | -2.658    | 0.116      | 1.184         | 1.249          | 1.332         | 1.212          |
| gi_119885693_ref_XM_589799.3_    | 539843         | ZBTB38           | zinc finger and BTB domain containing 38                  | Nucleus   | transcription regulator | H                               | -2.637    | 0.131      | 2.061         | 0.048          | 2.099         | 0.104          |
| gi_155371924_ref_NM_001101097.1_ | 519165         | HLX              | H2.0-like homeobox                                        | Nucleus   | transcription regulator | H                               | -2.635    | 0.124      | 1.600         | 0.443          | 1.747         | 0.373          |
| gi_148226872_ref_NM_001098035.1_ | 515406         | CSRNP1           | cysteine-serine-rich nuclear protein 1                    | Nucleus   | transcription regulator | H                               | -2.609    | 0.134      | 1.114         | 1.207          | 1.682         | 0.468          |
| gi_156121294_ref_NM_001102325.1_ | 781834         | ATF7IP           | activating transcription factor 7 interacting protein     | Nucleus   | transcription regulator | H                               | -2.608    | 0.138      | 2.295         | 0.015          | 2.561         | 0.019          |
| gi_156523181_ref_NM_001102535.1_ | 785815         | HR               | hairless homolog (mouse)                                  | Nucleus   | transcription regulator | H                               | -2.563    | 0.155      | -1.758        | 0.009          | 1.462         | 0.903          |
| gi_156523193_ref_NM_001102541.1_ | 100124497      | ZNF256           | zinc finger protein 256                                   | Nucleus   | transcription regulator | H                               | -2.559    | 0.156      | 1.593         | 0.487          | 1.557         | 0.722          |
| gi_119890844_ref_XM_864821.2_    | 539676         | DMTF1            | cyclin D binding myb-like transcription factor 1          | Nucleus   | transcription regulator | H                               | -2.548    | 0.151      | 1.993         | 0.067          | 2.573         | 0.018          |
| gi_119915240_ref_XM_865759.2_    | 504797         | TRERF1           | transcriptional regulating factor 1                       | Nucleus   | transcription regulator | H                               | -2.527    | 0.170      | 2.437         | 0.008          | 3.000         | 0.005          |
| gi_75677539_ref_NM_001033121.1_  | 613265         | ZNF148           | zinc finger protein 148                                   | Nucleus   | transcription regulator | H                               | -2.509    | 0.179      | 1.443         | 0.828          | 1.369         | 1.129          |
| gi_116004232_ref_NM_001077008.1_ | 767935         | SERTAD3          | SERTA domain containing 3                                 | Nucleus   | transcription regulator | H                               | -2.475    | 0.194      | 1.816         | 0.170          | 2.462         | 0.026          |
| gi_114051256_ref_NM_001046193.1_ | 515266         | ATF3             | activating transcription factor 3                         | Nucleus   | transcription regulator | H                               | -2.420    | 0.223      | -1.246        | 0.335          | 2.237         | 0.060          |
| gi_139949255_ref_NM_001083638.1_ | 407231         | MEF2A (includes  | myocyte enhancer factor 2A                                | Nucleus   | transcription regulator | VH                              | -2.410    | 0.228      | 2.079         | 0.045          | 2.417         | 0.029          |
| gi_118150815_ref_NM_001077853.1_ | 505251         | ELF1             | E74-like factor 1 (ets domain transcription factor)       | Nucleus   | transcription regulator | VH                              | -2.410    | 0.225      | 1.783         | 0.205          | 1.817         | 0.302          |
| gi_78369187_ref_NM_001035478.1_  | 616564         | SSBP2            | single-stranded DNA binding protein 2                     | Nucleus   | transcription regulator | VH                              | -2.397    | 0.228      | 2.042         | 0.054          | 2.537         | 0.020          |
| gi_115496825_ref_NM_001076041.1_ | 534915         | ASCC1            | activating signal cointegrator 1 complex subunit 1        | Nucleus   | transcription regulator | VH                              | -2.384    | 0.241      | 1.618         | 0.429          | 1.899         | 0.219          |
| gi_119920199_ref_XM_592333.3_    | 514473         | ATRX             | alpha thalassemia/mental retardation syndrome X-linke     | Nucleus   | transcription regulator | VH                              | -2.371    | 0.238      | 1.652         | 0.328          | 2.030         | 0.130          |
| gi_155372030_ref_NM_001101153.1_ | 534170         | ZNF274           | zinc finger protein 274                                   | Nucleus   | transcription regulator | H                               | -2.340    | 0.274      | 1.084         | 1.197          | 1.001         | 1.158          |
| gi_155372268_ref_NM_001101277.1_ | 618793         | FOXO4            | forkhead box O4                                           | Nucleus   | transcription regulator | H                               | -2.320    | 0.278      | 1.686         | 0.295          | 2.457         | 0.026          |
| gi_157073983_ref_NM_001103231.1_ | 506188         | MEF2B            | myocyte enhancer factor 2B                                | Nucleus   | transcription regulator | H                               | -2.259    | 0.339      | -1.121        | 0.662          | -1.166        | 0.597          |
| gi_154152090_ref_NM_001100344.1_ | 511794         | ZNF192           | zinc finger protein 192                                   | Nucleus   | transcription regulator | VH                              | -2.217    | 0.347      | 1.994         | 0.063          | 2.403         | 0.031          |
| gi_156120762_ref_NM_001102058.1_ | 520250         | ANKRD32          | ankyrin repeat domain 32                                  | Nucleus   | transcription regulator | H                               | -2.202    | 0.398      | 1.763         | 0.231          | 1.341         | 1.341          |
| gi_84000408_ref_NM_001038209.1_  | 615371         | NFIA             | nuclear factor I/A                                        | Nucleus   | transcription regulator | H                               | -2.169    | 0.407      | 3.492         | 0.000          | 4.474         | 0.000          |
| gi_27819621_ref_NM_174493.1_     | 282127         | ZFP36            | zinc finger protein 36, C3H type, homolog (mouse)         | Nucleus   | transcription regulator | H                               | -2.166    | 0.417      | 1.050         | 1.312          | 2.240         | 0.058          |
| gi_156739264_ref_NM_001075644.2_ | 514023         | ZNF180           | zinc finger protein 180                                   | Nucleus   | transcription regulator | H                               | -2.144    | 0.436      | 1.782         | 0.194          | 1.636         | 0.551          |
| gi_119919077_ref_XM_001251164.1_ | 507760         | PRDM10           | PR domain containing 10                                   | Nucleus   | transcription regulator | H                               | -2.134    | 0.431      | 1.453         | 0.733          | 1.532         | 0.736          |
| gi_148232125_ref_NM_001098062.1_ | 527056         | RNF6             | ring finger protein (C3H2C3 type) 6                       | Nucleus   | transcription regulator | H                               | -2.125    | 0.474      | 1.255         | 1.251          | 1.471         | 0.884          |

|                                 |        |          |                                                                    |           |                         |    |        |       |        |       |        |       |
|---------------------------------|--------|----------|--------------------------------------------------------------------|-----------|-------------------------|----|--------|-------|--------|-------|--------|-------|
| gi_115497199_ref_NM_001076077.1 | 536504 | PHTF1    | putative homeodomain transcription factor 1                        | Nucleus   | transcription regulator | VH | -2.124 | 0.483 | 1.343  | 1.134 | 1.449  | 0.971 |
| gi_119888259_ref_XM_614966.3    | 541192 | SATB2    | SATB homeobox 2                                                    | Nucleus   | transcription regulator | H  | -2.111 | 0.479 | 1.516  | 0.643 | 1.221  | 1.341 |
| gi_118151261_ref_NM_001078095.1 | 768207 | SS18L1   | synovial sarcoma translocation gene on chromosome 1                | Nucleus   | transcription regulator | H  | -2.096 | 0.491 | 1.116  | 1.141 | -1.185 | 0.373 |
| gi_119887167_ref_XM_865771.2    | 529631 | RUNX1    | runt-related transcription factor 1                                | Nucleus   | transcription regulator | VH | -2.059 | 0.559 | -2.009 | 0.000 | -1.273 | 0.313 |
| gi_156120724_ref_NM_001102039.1 | 516781 | NAB1     | NGFI-A binding protein 1 (EGR1 binding protein 1)                  | Nucleus   | transcription regulator | H  | -2.047 | 0.568 | 1.346  | 1.095 | 1.320  | 1.242 |
| gi_119901585_ref_XM_593747.2    | 540396 | HIVEP2   | human immunodeficiency virus type I enhancer binding               | Nucleus   | transcription regulator | VH | -2.047 | 0.555 | -1.182 | 0.520 | -1.288 | 0.263 |
| gi_119917098_ref_XM_601985.3    | 523683 | CUX1     | cut-like homeobox 1                                                | Nucleus   | transcription regulator | VH | -2.015 | 0.586 | 1.102  | 1.071 | 1.584  | 0.640 |
| gi_84370150_ref_NM_001038559.1  | 533232 | SMARCD1  | SWI/SNF related, matrix associated, actin dependent n              | Nucleus   | transcription regulator | VH | -1.997 | 0.639 | 1.217  | 1.257 | 1.597  | 0.630 |
| gi_78369035_ref_NM_001035424.1  | 539376 | MYNN     | myoneurin                                                          | Nucleus   | transcription regulator | H  | -1.982 | 0.667 | 1.725  | 0.265 | 1.530  | 0.772 |
| gi_119905298_ref_XM_615192.3    | 535183 | ZEB1     | zinc finger E-box binding homeobox 1                               | Nucleus   | transcription regulator | VH | -1.982 | 0.656 | -1.146 | 0.671 | 1.093  | 1.300 |
| gi_119918507_ref_XM_864818.2    | 613629 | SIRT1    | sirtuin (silent mating type information regulation 2 hom           | Nucleus   | transcription regulator | VH | -1.981 | 0.671 | 1.980  | 0.073 | 2.107  | 0.099 |
| gi_115495882_ref_NM_001076242.1 | 540818 | GABPB2   | GA binding protein transcription factor, beta subunit 2            | Nucleus   | transcription regulator | H  | -1.974 | 0.656 | 1.445  | 0.759 | 1.180  | 1.328 |
| gi_112817611_ref_NM_001015514.2 | 504512 | ETV6     | ets variant 6                                                      | Nucleus   | transcription regulator | VH | -1.974 | 0.660 | 1.279  | 1.246 | 1.436  | 0.977 |
| gi_149944716_ref_NM_001099115.1 | 540904 | SMARCA2  | SWI/SNF related, matrix associated, actin dependent n              | Nucleus   | transcription regulator | VH | -1.972 | 0.672 | 1.608  | 0.438 | 1.528  | 0.772 |
| gi_119911770_ref_XM_606825.3    | 528403 | ANKFY1   | ankyrin repeat and FYVE domain containing 1                        | Nucleus   | transcription regulator | H  | -1.961 | 0.701 | -1.010 | 1.021 | 1.488  | 0.850 |
| gi_75832109_ref_NM_001014965.2  | 540949 | ANKRD49  | ankyrin repeat domain 49                                           | Nucleus   | transcription regulator | H  | -1.949 | 0.715 | 2.472  | 0.007 | 2.636  | 0.014 |
| gi_119907162_ref_XM_605809.3    | 527418 | CBL      | Cas-Br-M (murine) ecotropic retroviral transforming sec            | Nucleus   | transcription regulator | VH | -1.947 | 0.702 | 1.182  | 1.182 | 1.707  | 0.435 |
| gi_119877632_ref_XM_603300.3    | 524960 | NRIP1    | nuclear receptor interacting protein 1                             | Nucleus   | transcription regulator | VH | -1.942 | 0.739 | 1.369  | 0.936 | 1.888  | 0.231 |
| gi_119905202_ref_XM_598095.3    | 519864 | MLLT10   | myeloid/lymphoid or mixed-lineage leukemia (trithorax              | Nucleus   | transcription regulator | VH | -1.927 | 0.711 | 1.856  | 0.133 | 1.879  | 0.233 |
| gi_119924137_ref_XM_609443.3    | 530961 | BARD1    | BRCA1 associated RING domain 1                                     | Nucleus   | transcription regulator | H  | -1.925 | 0.652 | 1.393  | 0.903 | -1.015 | 1.042 |
| gi_119911512_ref_XM_866591.2    | 536067 | TAF15    | TAF15 RNA polymerase II, TATA box binding protein (T               | Nucleus   | transcription regulator | H  | -1.920 | 0.766 | 1.421  | 0.491 | 1.364  | 1.177 |
| gi_31340639_ref_NM_174722.2     | 282707 | CEP290   | centrosomal protein 290kDa                                         | Cytoplasm | transcription regulator | H  | -1.865 | 0.841 | 2.017  | 0.059 | 1.555  | 0.703 |
| gi_66792815_ref_NM_001024511.1  | 510184 | TADA3    | transcriptional adaptor 3                                          | Nucleus   | transcription regulator | VH | -1.864 | 0.821 | 1.446  | 0.787 | 1.733  | 0.393 |
| gi_119911162_ref_XM_872583.2    | 523865 | MZF1     | myeloid zinc finger 1                                              | Nucleus   | transcription regulator | H  | -1.863 | 0.834 | -1.451 | 0.059 | 1.595  | 0.629 |
| gi_149642932_ref_NM_001099107.1 | 540378 | MDM2     | Mdm2 p53 binding protein homolog (mouse)                           | Nucleus   | transcription regulator | VH | -1.850 | 0.891 | 1.059  | 1.144 | 1.163  | 1.330 |
| gi_32189343_ref_NM_173993.1     | 281010 | ARNT     | aryl hydrocarbon receptor nuclear translocator                     | Nucleus   | transcription regulator | H  | -1.847 | 0.833 | 1.506  | 0.656 | 1.672  | 0.488 |
| gi_119924356_ref_XM_589474.3    | 512036 | ZNF449   | zinc finger protein 449                                            | Nucleus   | transcription regulator | H  | -1.838 | 0.871 | 1.987  | 0.072 | 1.241  | 1.342 |
| gi_116003910_ref_NM_001076848.1 | 514085 | E2F6     | E2F transcription factor 6                                         | Nucleus   | transcription regulator | VH | -1.838 | 0.875 | 1.319  | 1.147 | 1.294  | 1.308 |
| gi_119909509_ref_XM_001252556.1 | 532416 | POZ1     | POZ (BTB) and AT hook containing zinc finger 1                     | Nucleus   | transcription regulator | H  | -1.834 | 0.839 | 1.588  | 0.456 | 2.365  | 0.038 |
| gi_31342886_ref_NM_174080.2     | 281225 | UBE2K    | ubiquitin-conjugating enzyme E2K (UBC11 homolog, ye                | Cytoplasm | transcription regulator | VH | -1.832 | 0.905 | 1.219  | 1.253 | 1.149  | 1.332 |
| gi_119902367_ref_XM_869255.2    | 532556 | MGA      | MAX gene associated                                                | Nucleus   | transcription regulator | VH | -1.823 | 0.895 | 1.627  | 0.351 | 1.751  | 0.372 |
| gi_119908981_ref_XM_001250053.1 | 613439 | ELF2     | E74-like factor 2 (ets domain transcription factor)                | Nucleus   | transcription regulator | H  | -1.811 | 0.946 | 2.071  | 0.044 | 1.780  | 0.335 |
| gi_118150879_ref_NM_001077885.1 | 509039 | TCF12    | transcription factor 12                                            | Nucleus   | transcription regulator | VH | -1.810 | 0.934 | 1.609  | 0.456 | 1.866  | 0.251 |
| gi_114053148_ref_NM_001046556.1 | 615211 | MTF2     | metal response element binding transcription factor 2              | Nucleus   | transcription regulator | VH | -1.808 | 0.934 | 1.093  | 1.206 | 1.013  | 1.154 |
| gi_77735776_ref_NM_001034411.1  | 511795 | ZSCAN16  | zinc finger and SCAN domain containing 16                          | Nucleus   | transcription regulator | H  | -1.802 | 0.932 | 1.284  | 1.242 | -1.130 | 0.689 |
| gi_157279880_ref_NM_001104986.1 | 530184 | SBBP3    | single stranded DNA binding protein 3                              | Nucleus   | transcription regulator | VH | -1.800 | 0.951 | 1.140  | 1.244 | 1.214  | 1.343 |
| gi_156718125_ref_NM_001103098.1 | 530411 | UHRF1    | ubiquitin-like with PHD and ring finger domains 1                  | Nucleus   | transcription regulator | VH | -1.792 | 0.934 | -1.176 | 0.561 | -1.142 | 0.679 |
| gi_119914156_ref_XM_582981.3    | 506525 | RCOR1    | REST corepressor 1                                                 | Nucleus   | transcription regulator | VH | -1.789 | 0.945 | 1.137  | 1.209 | 2.163  | 0.079 |
| gi_119892216_ref_XM_869350.2    | 509843 | HDAC7    | histone deacetylase 7                                              | Nucleus   | transcription regulator | H  | -1.785 | 0.939 | -1.166 | 0.570 | 1.379  | 1.132 |
| gi_155372158_ref_NM_001101219.1 | 541180 | FEM1C    | fem-1 homolog c (C. elegans)                                       | Nucleus   | transcription regulator | VH | -1.784 | 0.943 | 1.487  | 0.705 | 1.497  | 0.837 |
| gi_73853751_ref_NM_174201.2     | 281542 | TP53     | tumor protein p53                                                  | Nucleus   | transcription regulator | VH | -1.777 | 0.969 | 1.411  | 0.906 | 1.510  | 0.802 |
| gi_115497281_ref_NM_001075637.1 | 513719 | HMG20A   | high-mobility group 20A                                            | Nucleus   | transcription regulator | VH | -1.755 | 1.013 | 1.773  | 0.219 | 1.735  | 0.396 |
| gi_119906688_ref_XM_601083.3    | 522795 | KLF10    | Kruppel-like factor 10                                             | Nucleus   | transcription regulator | H  | -1.750 | 1.019 | 2.065  | 0.047 | 3.260  | 0.003 |
| gi_119902916_ref_XM_879035.2    | 531476 | JDP2     | Jun dimerization protein 2                                         | Nucleus   | transcription regulator | H  | -1.735 | 1.023 | -1.334 | 0.148 | -1.020 | 1.046 |
| gi_114052638_ref_NM_001045892.1 | 504613 | MED24    | mediator complex subunit 24                                        | Nucleus   | transcription regulator | H  | -1.731 | 1.001 | -1.016 | 1.033 | 1.357  | 1.167 |
| gi_119905729_ref_XM_600851.3    | 522566 | PLAGL2   | pleiomorphic adenoma gene-like 2                                   | Nucleus   | transcription regulator | H  | -1.728 | 1.036 | -1.568 | 0.019 | -1.204 | 0.475 |
| gi_119905921_ref_XM_589971.3    | 512451 | ZHX3     | zinc fingers and homeoboxes 3                                      | Nucleus   | transcription regulator | H  | -1.723 | 1.034 | -1.334 | 0.185 | -1.091 | 0.797 |
| gi_119895922_ref_XM_869174.2    | 617002 | FAM172A  | family with sequence similarity 172, member A                      | unknown   | transcription regulator | VH | -1.721 | 1.027 | 1.407  | 0.885 | 1.446  | 0.953 |
| gi_125991919_ref_NM_001081612.1 | 540309 | ELK4     | ELK4, ETS-domain protein (SRF accessory protein 1)                 | Nucleus   | transcription regulator | VH | -1.720 | 1.049 | -1.532 | 0.010 | 1.223  | 1.340 |
| gi_73808098_ref_NM_001032294.1  | 509072 | ALS2CR8  | amyotrophic lateral sclerosis 2 (juvenile) chromosome              | Nucleus   | transcription regulator | H  | -1.715 | 1.052 | 1.919  | 0.100 | 1.757  | 0.356 |
| gi_119917787_ref_XM_611661.3    | 540481 | TCF7L2   | (includes transcription factor 7-like 2 (T-cell specific, HMG-box) | Nucleus   | transcription regulator | VH | -1.703 | 1.071 | 1.291  | 1.205 | 1.686  | 0.458 |
| gi_149642584_ref_NM_001099113.1 | 540816 | ZNF189   | zinc finger protein 189                                            | Nucleus   | transcription regulator | H  | -1.696 | 1.109 | 1.318  | 1.159 | 1.209  | 1.343 |
| gi_115495392_ref_NM_001075804.1 | 520313 | GABPB1   | (includes: GA binding protein transcription factor, beta subunit 1 | Nucleus   | transcription regulator | H  | -1.691 | 1.132 | 1.235  | 1.257 | -1.089 | 0.799 |
| gi_119887568_ref_XM_613036.3    | 540766 | SP3      | Sp3 transcription factor                                           | Nucleus   | transcription regulator | VH | -1.691 | 1.119 | 1.343  | 1.124 | 1.699  | 0.444 |
| gi_114052399_ref_NM_001045908.1 | 505051 | TAF1A    | TATA box binding protein (TBP)-associated factor, RNA              | Nucleus   | transcription regulator | H  | -1.686 | 1.078 | 2.043  | 0.053 | 1.413  | 1.017 |
| gi_78369291_ref_NM_001035368.1  | 527103 | ZSCAN21  | zinc finger and SCAN domain containing 21                          | Nucleus   | transcription regulator | H  | -1.685 | 1.123 | 1.961  | 0.082 | 1.800  | 0.307 |
| gi_119892260_ref_XM_596055.3    | 517876 | ARID2    | AT rich interactive domain 2 (ARID, RFX-like)                      | Nucleus   | transcription regulator | VH | -1.685 | 1.134 | 1.500  | 0.693 | 1.396  | 1.103 |
| gi_114052331_ref_NM_001046351.1 | 533430 | TRIP4    | thyroid hormone receptor interactor 4                              | Nucleus   | transcription regulator | VH | -1.682 | 1.145 | 1.684  | 0.325 | 1.566  | 0.703 |
| gi_119893929_ref_XM_867691.2    | 615792 | REST     | RE1-silencing transcription factor                                 | Nucleus   | transcription regulator | H  | -1.680 | 1.048 | 2.139  | 0.032 | 1.426  | 0.911 |
| gi_119892032_ref_XM_615033.3    | 541204 | ATF7     | activating transcription factor 7                                  | Nucleus   | transcription regulator | VH | -1.671 | 1.086 | 1.401  | 0.710 | 1.892  | 0.218 |
| gi_155372120_ref_NM_001101200.1 | 539938 | TAF8     | TAF8 RNA polymerase II, TATA box binding protein (TE               | Nucleus   | transcription regulator | VH | -1.666 | 1.166 | 1.548  | 0.580 | 1.567  | 0.688 |
| gi_118151399_ref_NM_001077960.1 | 524111 | ZNF227   | zinc finger protein 227                                            | Nucleus   | transcription regulator | VH | -1.666 | 1.144 | 1.122  | 1.218 | 1.089  | 1.264 |
| gi_77736579_ref_NM_001034801.1  | 617530 | CEBP6    | CCAAT/enhancer binding protein (C/EBP), gamma                      | Nucleus   | transcription regulator | VH | -1.661 | 1.150 | 1.009  | 1.102 | 1.097  | 1.296 |
| gi_148356239_ref_NM_001098377.1 | 506056 | EID1     | EP300 interacting inhibitor of differentiation 1                   | Nucleus   | transcription regulator | VH | -1.659 | 1.170 | 1.452  | 0.819 | 1.347  | 1.212 |
| gi_115496659_ref_NM_001075329.1 | 507729 | TCEA2    | transcription elongation factor A (SII), 2                         | Nucleus   | transcription regulator | H  | -1.656 | 1.107 | 1.891  | 0.108 | 2.229  | 0.063 |
| gi_119888072_ref_XM_001250304.1 | 521089 | CCNT2    | cyclin T2                                                          | Nucleus   | transcription regulator | H  | -1.651 | 1.181 | 1.520  | 0.632 | 1.498  | 0.856 |
| gi_119901461_ref_XM_581379.3    | 505138 | CASP8AP2 | caspase 8 associated protein 2                                     | Nucleus   | transcription regulator | VH | -1.651 | 1.170 | 1.354  | 1.070 | 1.387  | 1.126 |
| gi_165377267_ref_NM_001113531.1 | 504463 | SIRT2    | sirtuin (silent mating type information regulation 2 hom           | Nucleus   | transcription regulator | H  | -1.642 | 1.158 | 1.689  | 0.310 | 1.751  | 0.371 |
| gi_157074093_ref_NM_001103289.1 | 539761 | PLAGL1   | pleiomorphic adenoma gene-like 1                                   | Nucleus   | transcription regulator | VH | -1.642 | 1.184 | 1.912  | 0.104 | 2.151  | 0.083 |
| gi_118151061_ref_NM_001077983.1 | 529698 | INVS     | inversin                                                           | Nucleus   | transcription regulator | H  | -1.632 | 1.182 | 1.820  | 0.171 | 2.282  | 0.051 |
| gi_116004080_ref_NM_001076928.1 | 540806 | SMAD9    | SMAD family member 9                                               | Nucleus   | transcription regulator | VH | -1.631 | 1.200 | 1.392  | 0.973 | 1.514  | 0.814 |
| gi_119906083_ref_XM_613264.3    | 533757 | ADNP     | activity-dependent neuroprotector homeobox                         | Nucleus   | transcription regulator | VH | -1.630 | 1.204 | 1.536  | 0.608 | 1.823  | 0.288 |
| gi_156120812_ref_NM_001102083.1 | 524585 | TTF1     | transcription termination factor, RNA polymerase I                 | Nucleus   | transcription regulator | H  | -1.624 | 1.183 | 1.763  | 0.216 | 1.483  | 0.870 |
| gi_114052996_ref_NM_001046237.1 | 518176 | ZNF323   | zinc finger protein 323                                            | Nucleus   | transcription regulator | H  | -1.623 | 1.189 | 2.297  | 0.015 | 2.129  | 0.093 |

|                                  |           |                   |                                                           |           |                         |    |        |       |        |       |        |       |
|----------------------------------|-----------|-------------------|-----------------------------------------------------------|-----------|-------------------------|----|--------|-------|--------|-------|--------|-------|
| gi_119901261_ref_XM_596663.3_    | 518472    | GTF3C6            | general transcription factor IIIC, polypeptide 6, alpha 3 | unknown   | transcription regulator | H  | -1.618 | 1.208 | 1.424  | 0.893 | 1.006  | 1.110 |
| gi_119918864_ref_XM_864539.2_    | 541248    | RSF1              | remodeling and spacing factor 1                           | Nucleus   | transcription regulator | H  | -1.613 | 1.227 | 1.552  | 0.514 | 1.707  | 0.438 |
| gi_119894165_ref_XM_001249488.1_ | 781149    | AFF1              | AF4/FMR2 family, member 1                                 | Nucleus   | transcription regulator | H  | -1.611 | 1.193 | -1.002 | 1.049 | 1.110  | 1.238 |
| gi_119905647_ref_XR_028807.1_    | 789854    | TAF4              | TAF4 RNA polymerase II, TATA box binding protein (TE      | Nucleus   | transcription regulator | H  | -1.610 | 1.237 | 1.579  | 0.509 | 1.803  | 0.315 |
| gi_119927108_ref_XM_600466.3_    | 522191    | MTERF             | mitochondrial transcription termination factor            | Cytoplasm | transcription regulator | H  | -1.608 | 1.232 | 1.460  | 0.790 | 1.129  | 1.276 |
| gi_114052738_ref_NM_001046298.1_ | 529124    | FLI1              | Friend leukemia virus integration 1                       | Nucleus   | transcription regulator | VH | -1.605 | 1.209 | 1.102  | 1.196 | 1.093  | 1.246 |
| gi_157427973_ref_NM_001105424.1_ | 539542    | HHEX              | hematopoietically expressed homeobox                      | Nucleus   | transcription regulator | H  | -1.603 | 1.180 | -1.550 | 1.024 | 1.668  | 0.466 |
| gi_47564039_ref_NM_001001147.1_  | 407194    | CNTN1             | cyclin T1                                                 | Nucleus   | transcription regulator | H  | -1.596 | 1.182 | 1.023  | 1.021 | 1.101  | 1.236 |
| gi_157279924_ref_NM_001105008.1_ | 618133    | SUPT3H (includes  | suppressor of Ty 3 homolog (S. cerevisiae)                | Nucleus   | transcription regulator | H  | -1.590 | 1.232 | 1.598  | 0.443 | 1.297  | 1.243 |
| gi_119901004_ref_XM_598421.3_    | 520186    | CEP110            | centrosomal protein 110kDa                                | Nucleus   | transcription regulator | VH | -1.583 | 1.239 | 1.193  | 1.252 | 1.088  | 1.276 |
| gi_164414432_ref_NM_176635.3_    | 338034    | MYBL1             | v-myb myeloblastosis viral oncogene homolog (avian)-      | Nucleus   | transcription regulator | H  | -1.582 | 1.244 | 1.719  | 0.271 | 1.064  | 1.256 |
| gi_62751780_ref_NM_001015654.1_  | 534403    | SP2               | Sp2 transcription factor                                  | Nucleus   | transcription regulator | H  | -1.572 | 1.262 | 1.324  | 1.153 | 1.263  | 1.340 |
| gi_119875275_ref_XM_609842.3_    | 531350    | BACH1             | BTB and CNC homology 1, basic leucine zipper transcr      | Nucleus   | transcription regulator | H  | -1.569 | 1.255 | 1.172  | 1.248 | 1.625  | 0.566 |
| gi_119901876_ref_XM_606924.3_    | 528498    | JMY               | junction mediating and regulatory protein, p53 cofactor   | Nucleus   | transcription regulator | H  | -1.563 | 1.288 | 1.725  | 0.247 | 1.819  | 0.292 |
| gi_156120954_ref_NM_001102154.1_ | 533243    | ZNF143            | zinc finger protein 143                                   | Nucleus   | transcription regulator | VH | -1.562 | 1.293 | 1.281  | 1.241 | 1.129  | 1.325 |
| gi_119883223_ref_XM_865825.2_    | 614346    | TBL1XR1           | transducin (beta)-like 1 X-linked receptor 1              | Nucleus   | transcription regulator | VH | -1.559 | 1.293 | 1.302  | 1.220 | 1.083  | 1.264 |
| gi_119926771_ref_XM_584325.3_    | 507668    | LCOR              | ligand dependent nuclear receptor corepressor             | Nucleus   | transcription regulator | H  | -1.557 | 1.265 | 1.090  | 0.826 | 1.177  | 1.319 |
| gi_115497767_ref_NM_001075224.1_ | 505818    | PPP1R13L          | protein phosphatase 1, regulatory (inhibitor) subunit 13  | Nucleus   | transcription regulator | H  | -1.555 | 1.276 | -1.008 | 1.025 | 1.211  | 1.439 |
| gi_115497323_ref_NM_001075265.1_ | 506485    | PBXIP1            | pre-B-cell leukemia homeobox interacting protein 1        | Nucleus   | transcription regulator | H  | -1.546 | 1.300 | 1.161  | 1.252 | 2.097  | 0.104 |
| gi_119912578_ref_XM_001249745.1_ | 532986    | BPTF              | bromodomain PHD finger transcription factor               | Nucleus   | transcription regulator | VH | -1.544 | 1.266 | 1.432  | 0.814 | 1.636  | 0.548 |
| gi_119890380_ref_XM_879774.2_    | 512622    | KDM4A             | lysine (K)-specific demethylase 4A                        | Nucleus   | transcription regulator | H  | -1.542 | 1.290 | 1.264  | 1.253 | 1.788  | 0.321 |
| gi_119893251_ref_XM_585886.3_    | 509011    | MKL1              | megakaryoblastic leukemia (translocation) 1               | Nucleus   | transcription regulator | VH | -1.542 | 1.300 | -1.171 | 0.520 | 1.483  | 0.890 |
| gi_119910578_ref_XM_001256446.1_ | 789798    | ERF               | Ets2 repressor factor                                     | Nucleus   | transcription regulator | H  | -1.537 | 1.212 | -1.189 | 0.151 | 2.448  | 0.028 |
| gi_155372102_ref_NM_001101190.1_ | 539320    | ZSCAN2            | zinc finger and SCAN domain containing 2                  | Nucleus   | transcription regulator | H  | -1.530 | 1.280 | 1.239  | 1.256 | 1.312  | 1.255 |
| gi_78050074_ref_NM_001035057.1_  | 508445    | HCLS1             | hematopoietic cell-specific Lyn substrate 1               | Nucleus   | transcription regulator | VH | -1.528 | 1.299 | 1.370  | 1.027 | 1.449  | 0.949 |
| gi_115495820_ref_NM_001076249.1_ | 540932    | FBXW7             | F-box and WD repeat domain containing 7                   | Nucleus   | transcription regulator | H  | -1.522 | 1.313 | -1.366 | 0.133 | -1.231 | 0.382 |
| gi_114051342_ref_NM_001046143.1_ | 513265    | CDKN2AIP          | CDKN2A interacting protein                                | Nucleus   | transcription regulator | H  | -1.516 | 1.318 | 1.103  | 1.194 | -1.040 | 0.989 |
| gi_114051613_ref_NM_001046519.1_ | 613828    | DR1               | down-regulator of transcription 1, TBP-binding (negativ   | Nucleus   | transcription regulator | VH | -1.515 | 1.332 | 1.344  | 1.121 | -1.112 | 0.736 |
| gi_158819092_ref_NM_001110181.1_ | 518857    | ERCC8             | excision repair cross-complementing rodent repair defic   | Nucleus   | transcription regulator | H  | -1.513 | 1.324 | 1.324  | 1.129 | -1.099 | 0.783 |
| gi_119884867_ref_XM_610719.3_    | 532209    | MECOM             | MDS1 and EVI1 complex locus                               | Nucleus   | transcription regulator | H  | -1.508 | 1.324 | 1.871  | 0.132 | 1.847  | 0.271 |
| gi_115495874_ref_NM_001075460.1_ | 510654    | HDAC10            | histone deacetylase 10                                    | Nucleus   | transcription regulator | H  | -1.498 | 1.317 | -1.446 | 0.057 | 1.258  | 1.340 |
| gi_119914492_ref_XM_868895.2_    | 616786    | TMF1              | TATA element modulatory factor 1                          | Cytoplasm | transcription regulator | H  | -1.493 | 1.347 | 1.098  | 1.200 | -1.117 | 0.728 |
| gi_76634364_ref_XM_585648.2_     | 539210    | PLAG1             | pleiomorphic adenoma gene 1                               | Nucleus   | transcription regulator | H  | -1.491 | 1.332 | 1.457  | 0.789 | 1.303  | 1.296 |
| gi_84000084_ref_NM_001038054.1_  | 507723    | HMG20B            | high-mobility group 20B                                   | Nucleus   | transcription regulator | VH | -1.488 | 1.347 | -1.081 | 0.896 | 1.230  | 1.342 |
| gi_115495314_ref_NM_001076290.1_ | 613818    | TBPL1             | TBP-like 1                                                | Nucleus   | transcription regulator | VH | -1.488 | 1.355 | 1.070  | 1.187 | -1.058 | 0.962 |
| gi_94966798_ref_NM_001040494.1_  | 404183    | EED               | embryonic ectoderm development                            | Nucleus   | transcription regulator | VH | -1.487 | 1.356 | 1.314  | 1.199 | 1.167  | 1.333 |
| gi_119916696_ref_XM_867976.2_    | 528545    | ANKS3             | ankyrin repeat and sterile alpha motif domain containi    | Nucleus   | transcription regulator | H  | -1.477 | 1.358 | -2.095 | 0.000 | -2.156 | 0.000 |
| gi_119910150_ref_XM_614673.3_    | 541127    | NFATC3            | nuclear factor of activated T-cells, cytoplasmic, calcine | Nucleus   | transcription regulator | H  | -1.470 | 1.355 | 1.264  | 1.253 | 1.690  | 0.462 |
| gi_119911784_ref_XM_582242.3_    | 505878    | SOX15             | SRY (sex determining region Y)-box 15                     | Nucleus   | transcription regulator | H  | -1.468 | 1.356 | 1.031  | 1.116 | 1.062  | 1.232 |
| gi_118151147_ref_NM_001078028.1_ | 540824    | BCL10             | B-cell CLL/lymphoma 10                                    | Cytoplasm | transcription regulator | H  | -1.461 | 1.357 | 1.290  | 1.170 | 1.034  | 1.066 |
| gi_156121092_ref_NM_001102223.1_ | 539013    | CDYL              | chromodomain protein, Y-like                              | Nucleus   | transcription regulator | H  | -1.461 | 1.358 | 1.137  | 1.215 | 1.126  | 1.314 |
| gi_82697318_ref_NM_001037448.1_  | 506667    | LOC642521         | similar to nuclear DNA-binding protein                    | unknown   | transcription regulator | H  | -1.461 | 1.363 | 1.073  | 1.177 | 1.111  | 1.277 |
| gi_119903867_ref_XM_867432.2_    | 525346    | NCOA1             | nuclear receptor coactivator 1                            | Nucleus   | transcription regulator | H  | -1.461 | 1.351 | 1.787  | 0.188 | 2.211  | 0.065 |
| gi_119904828_ref_XM_001249546.1_ | 781157    | HTATSF1           | HIV-1 Tat specific factor 1                               | Nucleus   | transcription regulator | VH | -1.460 | 1.373 | 1.232  | 1.248 | 1.150  | 1.328 |
| gi_119892443_ref_XM_876015.2_    | 509799    | BAZZ2             | bromodomain adjacent to zinc finger domain, 2A            | Nucleus   | transcription regulator | VH | -1.458 | 1.368 | -1.018 | 1.023 | 1.573  | 0.686 |
| gi_149642726_ref_NM_001099174.1_ | 618214    | H0XB3             | homeobox B3                                               | Nucleus   | transcription regulator | H  | -1.455 | 1.368 | 1.263  | 1.253 | 1.507  | 0.826 |
| gi_77735978_ref_NM_001034516.1_  | 516078    | SNAPC2            | small nuclear RNA activating complex, polypeptide 2, 4    | Nucleus   | transcription regulator | H  | -1.454 | 1.364 | -1.455 | 0.048 | -1.217 | 0.420 |
| gi_119916711_ref_XM_604254.3_    | 525895    | UBN1              | ubiquitin 1                                               | Nucleus   | transcription regulator | VH | -1.450 | 1.378 | -1.311 | 0.185 | 1.126  | 1.327 |
| gi_156718109_ref_NM_001103090.1_ | 508384    | GATAD2A           | GATA zinc finger domain containing 2A                     | Nucleus   | transcription regulator | VH | -1.447 | 1.370 | -1.130 | 0.710 | 1.149  | 1.328 |
| gi_115497357_ref_NM_001075262.1_ | 506448    | ZNF397            | zinc finger protein 397                                   | Nucleus   | transcription regulator | H  | -1.445 | 1.379 | 1.448  | 0.847 | 1.250  | 1.334 |
| gi_119904245_ref_XM_592658.3_    | 540249    | GTF3C4            | general transcription factor IIIC, polypeptide 4, 90kDa   | Nucleus   | transcription regulator | H  | -1.436 | 1.364 | 1.195  | 1.218 | 1.530  | 0.731 |
| gi_115494991_ref_NM_001075396.1_ | 509231    | PIAS1             | protein inhibitor of activated STAT, 1                    | Nucleus   | transcription regulator | VH | -1.434 | 1.380 | 1.213  | 1.256 | 1.285  | 1.326 |
| gi_119889209_ref_XM_612098.3_    | 540563    | ASH1L             | ash1 (absent, small, or homeotic)-like (Drosophila)       | Nucleus   | transcription regulator | H  | -1.431 | 1.373 | 1.334  | 1.062 | 1.813  | 0.301 |
| gi_119903894_ref_XM_868832.2_    | 616730    | KLF11             | Kruppel-like factor 11                                    | Nucleus   | transcription regulator | H  | -1.430 | 1.386 | 1.936  | 0.095 | 2.482  | 0.024 |
| gi_119911470_ref_XM_603205.3_    | 524868    | MED13             | mediator complex subunit 13                               | Nucleus   | transcription regulator | VH | -1.426 | 1.389 | 1.139  | 1.238 | 1.476  | 0.920 |
| gi_84370168_ref_NM_001038566.1_  | 539496    | MED21             | mediator complex subunit 21                               | Nucleus   | transcription regulator | VH | -1.424 | 1.389 | 1.026  | 1.118 | -1.053 | 0.989 |
| gi_166157495_ref_NM_001113767.1_ | 533620    | ANKRD26           | ankyrin repeat domain 26                                  | Nucleus   | transcription regulator | H  | -1.423 | 1.378 | 1.895  | 0.110 | 1.500  | 0.817 |
| gi_119918081_ref_XM_592435.3_    | 337916    | IRF2              | interferon regulatory factor 2                            | Nucleus   | transcription regulator | VH | -1.423 | 1.388 | 1.546  | 0.594 | 1.664  | 0.502 |
| gi_119911986_ref_XM_866711.2_    | 507663    | NCOR1             | nuclear receptor co-repressor 1                           | Nucleus   | transcription regulator | VH | -1.422 | 1.379 | 1.098  | 1.194 | 1.323  | 1.234 |
| gi_119910346_ref_XM_001253667.1_ | 785741    | ZBTB32            | zinc finger and BTB domain containing 32                  | Nucleus   | transcription regulator | H  | -1.416 | 1.359 | 4.011  | 0.000 | 6.205  | 0.000 |
| gi_119905251_ref_XM_864298.2_    | 613475    | MSRB2             | methionine sulfoxide reductase B2                         | Nucleus   | transcription regulator | VH | -1.416 | 1.388 | 3.091  | 0.000 | 2.561  | 0.019 |
| gi_114051208_ref_NM_001046581.1_ | 616539    | CHURC1            | churchill domain containing 1                             | Nucleus   | transcription regulator | H  | -1.414 | 1.388 | 1.371  | 1.041 | 1.033  | 1.173 |
| gi_119892694_ref_XM_864033.2_    | 505341    | HCFC2             | host cell factor C2                                       | Nucleus   | transcription regulator | H  | -1.413 | 1.389 | 1.359  | 1.044 | 1.338  | 1.213 |
| gi_34147042_ref_NM_183082.1_     | 360190    | AIP               | aryl hydrocarbon receptor interacting protein             | Nucleus   | transcription regulator | H  | -1.410 | 1.389 | 1.173  | 1.255 | 1.474  | 0.898 |
| gi_119901604_ref_XM_594787.3_    | 516630    | SHPRH             | SNF2 histone linker PHD RING helicase                     | Nucleus   | transcription regulator | H  | -1.408 | 1.389 | 2.226  | 0.022 | 2.066  | 0.116 |
| gi_77736452_ref_NM_001034754.1_  | 614227    | TAF12 (includes E | TAF12 RNA polymerase II, TATA box binding protein (T      | Nucleus   | transcription regulator | H  | -1.407 | 1.391 | 1.238  | 1.256 | -1.344 | 0.184 |
| gi_118151227_ref_NM_001078074.1_ | 617345    | VAV1              | vav 1 guanine nucleotide exchange factor                  | Nucleus   | transcription regulator | VH | -1.406 | 1.387 | 1.300  | 1.200 | 1.401  | 1.065 |
| gi_119331201_ref_NM_001079786.1_ | 614382    | NFYB              | nuclear transcription factor Y, beta                      | Nucleus   | transcription regulator | H  | -1.405 | 1.390 | 1.309  | 1.201 | 1.163  | 1.315 |
| gi_149642624_ref_NM_001098980.1_ | 515219    | MAFG              | v-maf musculoaponeurotic fibrosarcoma oncogene hom        | Nucleus   | transcription regulator | H  | -1.403 | 1.389 | 1.116  | 1.229 | 1.272  | 1.335 |
| gi_114051673_ref_NM_001046435.1_ | 538675    | CALCOCO1          | calcium binding and coiled-coil domain 1                  | Nucleus   | transcription regulator | H  | -1.401 | 1.389 | 2.751  | 0.002 | 4.896  | 0.000 |
| gi_119916360_ref_XM_612798.3_    | 533403    | PIAS2             | protein inhibitor of activated STAT, 2                    | Nucleus   | transcription regulator | H  | -1.401 | 1.387 | 1.531  | 0.589 | 1.457  | 0.915 |
| gi_119904714_ref_XM_864451.2_    | 613543    | CENPJ             | centromere protein J                                      | Nucleus   | transcription regulator | H  | -1.399 | 1.388 | 1.547  | 0.539 | 1.137  | 1.310 |
| gi_155371844_ref_NM_001101057.1_ | 100137723 | GTF2H4            | general transcription factor IIH, polypeptide 4, 52kDa    | Nucleus   | transcription regulator | H  | -1.398 | 1.389 | 1.157  | 1.234 | -1.171 | 0.574 |
| gi_27805856_ref_NM_174285.1_     | 281713    | CREB1             | cAMP responsive element binding protein 1                 | Nucleus   | transcription regulator | VH | -1.396 | 1.388 | 1.366  | 1.032 | 1.141  | 1.328 |

|                                  |        |                  |                                                           |           |                         |    |        |       |        |       |        |       |
|----------------------------------|--------|------------------|-----------------------------------------------------------|-----------|-------------------------|----|--------|-------|--------|-------|--------|-------|
| gi_115497737_ref_NM_001075597.1  | 513065 | TAF13            | TAF13 RNA polymerase II, TATA box binding protein (T      | Nucleus   | transcription regulator | H  | -1.392 | 1.384 | 1.232  | 1.254 | -1.042 | 0.939 |
| gi_119915832_ref_XM_606667.3     | 528253 | JARID2           | jumonji, AT rich interactive domain 2                     | Nucleus   | transcription regulator | VH | -1.391 | 1.387 | 1.345  | 1.063 | 1.890  | 0.221 |
| gi_119915606_ref_XM_001252983.1  | 785479 | HMGN1            | high-mobility group nucleosome binding domain 1           | Nucleus   | transcription regulator | VH | -1.389 | 1.340 | 1.070  | 0.837 | -1.279 | 0.180 |
| gi_119892486_ref_XM_599314.3     | 521057 | ANKRD52          | ankyrin repeat domain 52                                  | Nucleus   | transcription regulator | H  | -1.387 | 1.384 | -1.975 | 0.002 | 1.038  | 1.161 |
| gi_157427817_ref_NM_001105346.1  | 508905 | ZRANB2           | zinc finger, RAN-binding domain containing 2              | Nucleus   | transcription regulator | H  | -1.384 | 1.390 | 1.371  | 1.062 | 1.238  | 1.340 |
| gi_119902710_ref_XM_864346.2     | 531515 | ARID4A           | AT rich interactive domain 4A (RBP1-like)                 | Nucleus   | transcription regulator | VH | -1.382 | 1.388 | 1.464  | 0.787 | 1.567  | 0.693 |
| gi_119919719_ref_XM_590977.3     | 540023 | BCORL1           | BCL6 co-repressor-like 1                                  | Nucleus   | transcription regulator | H  | -1.379 | 1.380 | -1.298 | 0.201 | 1.169  | 1.314 |
| gi_134085960_ref_NM_001083405.1  | 510557 | HSF2             | heat shock transcription factor 2                         | Nucleus   | transcription regulator | VH | -1.376 | 1.390 | 1.424  | 0.905 | 1.158  | 1.324 |
| gi_139949221_ref_NM_001083746.1  | 539836 | ZNF689           | zinc finger protein 689                                   | Nucleus   | transcription regulator | H  | -1.373 | 1.389 | 1.229  | 1.256 | 1.273  | 1.325 |
| gi_164519011_ref_NM_001113316.1  | 767979 | HSBP1            | heat shock factor binding protein 1                       | Nucleus   | transcription regulator | VH | -1.373 | 1.384 | 1.097  | 1.193 | 1.078  | 1.272 |
| gi_62751509_ref_NM_001015597.1   | 514369 | NFKBIL1          | nuclear factor of kappa light polypeptide gene enhance    | Nucleus   | transcription regulator | H  | -1.366 | 1.387 | 1.050  | 1.153 | 1.419  | 1.041 |
| gi_78369237_ref_NM_001035305.1   | 515119 | C19ORF2          | chromosome 19 open reading frame 2                        | Nucleus   | transcription regulator | VH | -1.366 | 1.387 | 1.336  | 1.152 | 1.220  | 1.341 |
| gi_119916689_ref_XM_581740.3     | 505453 | CREBBP           | CREB binding protein                                      | Nucleus   | transcription regulator | VH | -1.361 | 1.377 | -1.159 | 0.381 | 1.843  | 0.263 |
| gi_119903730_ref_XM_001254141.1  | 786476 | SERTAD2          | SERTA domain containing 2                                 | Cytoplasm | transcription regulator | VH | -1.360 | 1.373 | -1.080 | 0.738 | 1.192  | 1.330 |
| gi_155372186_ref_NM_0011101234.1 | 614773 | ZFP36L1          | zinc finger protein 36, C3H type-like 1                   | Nucleus   | transcription regulator | VH | -1.360 | 1.381 | 1.087  | 1.186 | 1.088  | 1.277 |
| gi_119919942_ref_XM_588477.3     | 539629 | MCP2             | methyl CpG binding protein 2 (Rett syndrome)              | Nucleus   | transcription regulator | VH | -1.359 | 1.385 | 1.039  | 1.146 | 1.352  | 1.192 |
| gi_119915671_ref_XM_001254052.1  | 786347 | ZNRD1            | zinc ribbon domain containing 1                           | Nucleus   | transcription regulator | H  | -1.358 | 1.353 | -1.055 | 0.746 | -1.745 | 0.005 |
| gi_153792238_ref_NM_001099717.1  | 540945 | DEK              | DEK oncogene                                              | Nucleus   | transcription regulator | VH | -1.357 | 1.372 | 1.337  | 1.132 | 1.240  | 1.343 |
| gi_139949089_ref_NM_001083687.1  | 515444 | ACAP3            | ArfGAP with coiled-coil, ankyrin repeat and PH domain     | Nucleus   | transcription regulator | H  | -1.356 | 1.374 | -1.933 | 0.001 | 1.001  | 1.038 |
| gi_119892720_ref_XM_612859.3     | 540731 | PRDM4            | PR domain containing 4                                    | Nucleus   | transcription regulator | H  | -1.356 | 1.381 | 1.285  | 1.243 | 1.426  | 1.036 |
| gi_115495742_ref_NM_001076256.1  | 541116 | MXD4             | MAX dimerization protein 4                                | Nucleus   | transcription regulator | H  | -1.353 | 1.383 | 1.694  | 0.293 | 2.966  | 0.006 |
| gi_82697380_ref_NM_001037479.1   | 536936 | SUV39H2          | suppressor of variegation 3-9 homolog 2 (Drosophila)      | Nucleus   | transcription regulator | H  | -1.350 | 1.385 | 1.437  | 0.881 | -1.093 | 0.842 |
| gi_115497065_ref_NM_001075289.1  | 506967 | ATF1             | activating transcription factor 1                         | Nucleus   | transcription regulator | H  | -1.342 | 1.376 | 1.148  | 1.242 | -1.129 | 0.673 |
| gi_119918744_ref_XM_601197.3     | 522908 | ERCC6            | excision repair cross-complementing rodent repair defi    | Nucleus   | transcription regulator | H  | -1.342 | 1.375 | 1.938  | 0.094 | 2.014  | 0.142 |
| gi_31340799_ref_NM_174732.2      | 282848 | PFDN5            | prefoldin subunit 5                                       | Nucleus   | transcription regulator | H  | -1.342 | 1.378 | -1.002 | 1.057 | 1.225  | 1.343 |
| gi_119918600_ref_XM_867653.2     | 535403 | MYST4            | MYST histone acetyltransferase (monocytic leukemia)       | Nucleus   | transcription regulator | H  | -1.340 | 1.353 | 1.625  | 0.385 | 2.237  | 0.059 |
| gi_157041263_ref_NM_001103174.1  | 540661 | BRWD1            | bromodomain and WD repeat domain containing 1             | Nucleus   | transcription regulator | VH | -1.337 | 1.380 | 1.288  | 1.191 | 1.733  | 0.389 |
| gi_115495362_ref_NM_001076287.1  | 613751 | GPBP1            | GC-rich promoter binding protein 1                        | Nucleus   | transcription regulator | VH | -1.331 | 1.377 | 1.111  | 1.234 | 1.143  | 1.330 |
| gi_118601757_ref_NM_001079583.1  | 509729 | MED7 (includes E | mediator complex subunit 7                                | Nucleus   | transcription regulator | H  | -1.329 | 1.381 | 1.213  | 1.257 | 1.014  | 1.150 |
| gi_78042559_ref_NM_001035106.1   | 512411 | ZNF174           | zinc finger protein 174                                   | Nucleus   | transcription regulator | H  | -1.325 | 1.372 | 1.426  | 0.859 | 1.353  | 1.153 |
| gi_119895491_ref_XM_001251355.1  | 782746 | PURA             | purine-rich element binding protein A                     | Nucleus   | transcription regulator | H  | -1.324 | 1.373 | 1.251  | 1.373 | 1.434  | 1.004 |
| gi_119892451_ref_XM_588270.3     | 511023 | STAT2            | signal transducer and activator of transcription 2, 113kD | Nucleus   | transcription regulator | H  | -1.324 | 1.360 | 1.520  | 0.629 | 2.078  | 0.112 |
| gi_119920644_ref_XM_593202.3     | 515220 | MSL3             | male-specific lethal 3 homolog (Drosophila)               | Nucleus   | transcription regulator | VH | -1.324 | 1.371 | 1.211  | 1.258 | 1.473  | 0.925 |
| gi_119900789_ref_XM_613307.3     | 540823 | ZNF367           | zinc finger protein 367                                   | Nucleus   | transcription regulator | H  | -1.323 | 1.376 | -1.076 | 0.918 | -1.321 | 0.221 |
| gi_114052580_ref_NM_001045895.1  | 504662 | ZNHIT3           | zinc finger, HIT type 3                                   | Nucleus   | transcription regulator | H  | -1.323 | 1.373 | 1.132  | 1.237 | 1.040  | 1.223 |
| gi_119908237_ref_XM_580880.3     | 504716 | AHCTF1           | AT hook containing transcription factor 1                 | Nucleus   | transcription regulator | H  | -1.322 | 1.345 | 1.210  | 1.248 | -1.002 | 1.052 |
| gi_119916928_ref_XM_611393.3     | 511420 | SRCAP            | Snf2-related CREBBP activator protein                     | Cytoplasm | transcription regulator | H  | -1.321 | 1.349 | -1.123 | 0.497 | 1.664  | 0.493 |
| gi_119895763_ref_XM_612851.3     | 533443 | CNOT8            | CCR4-NOT transcription complex, subunit 8                 | Nucleus   | transcription regulator | VH | -1.321 | 1.371 | 1.326  | 1.176 | 1.084  | 1.296 |
| gi_115495326_ref_NM_001075503.1  | 511236 | TAF1B            | TATA box binding protein (TBP)-associated factor, RNA     | Nucleus   | transcription regulator | H  | -1.315 | 1.366 | 1.037  | 1.157 | -1.163 | 0.631 |
| gi_119928183_ref_XR_027431.1     | 539883 | PTTG1            | pituitary tumor-transforming 1                            | Nucleus   | transcription regulator | H  | -1.313 | 1.135 | 1.072  | 0.725 | -1.707 | 0.005 |
| gi_116004030_ref_NM_001076907.1  | 534712 | RB1              | retinoblastoma 1                                          | Nucleus   | transcription regulator | H  | -1.311 | 1.365 | 1.244  | 1.251 | 1.380  | 1.123 |
| gi_119903526_ref_XM_864560.2     | 509135 | REL              | v-rel reticuloendotheliosis viral oncogene homolog (avi   | Nucleus   | transcription regulator | H  | -1.310 | 1.367 | 1.504  | 0.645 | 1.327  | 1.234 |
| gi_119915226_ref_XM_587114.3     | 510032 | TFEB             | transcription factor EB                                   | Nucleus   | transcription regulator | H  | -1.310 | 1.339 | -1.000 | 1.040 | 1.462  | 0.919 |
| gi_115496122_ref_NM_001075748.1  | 517097 | CTCF             | CCCTC-binding factor (zinc finger protein)                | Nucleus   | transcription regulator | VH | -1.308 | 1.371 | 1.342  | 1.129 | 1.206  | 1.343 |
| gi_119892490_ref_XM_612597.3     | 540671 | IKZF4            | IKAROS family zinc finger 4 (Eos)                         | Nucleus   | transcription regulator | H  | -1.305 | 1.335 | -1.267 | 0.294 | 1.238  | 1.343 |
| gi_119895244_ref_XM_883278.2     | 533359 | MXD3             | MAX dimerization protein 3                                | Nucleus   | transcription regulator | H  | -1.303 | 1.335 | -1.198 | 0.450 | -1.360 | 0.148 |
| gi_164448597_ref_NM_001035271.2  | 505884 | KLF6             | Kruppel-like factor 6                                     | Nucleus   | transcription regulator | VH | -1.301 | 1.348 | 1.414  | 0.897 | 1.584  | 0.650 |
| gi_119893850_ref_XM_001253114.1  | 784953 | NFXL1            | nuclear transcription factor, X-box binding-like 1        | Nucleus   | transcription regulator | H  | -1.298 | 1.358 | 1.568  | 0.534 | 1.285  | 1.327 |
| gi_83649734_ref_NM_203362.2      | 541099 | MTPN             | myotrophin                                                | Nucleus   | transcription regulator | H  | -1.298 | 1.364 | 1.146  | 1.248 | 1.022  | 1.207 |
| gi_119918389_ref_XM_614988.3     | 535018 | TARBP1 (includes | TAR (HIV-1) RNA binding protein 1                         | Nucleus   | transcription regulator | H  | -1.296 | 1.334 | 1.205  | 1.254 | 1.333  | 1.245 |
| gi_118151139_ref_NM_001078027.1  | 540741 | SP1              | Sp1 transcription factor                                  | Nucleus   | transcription regulator | VH | -1.294 | 1.353 | 1.119  | 1.236 | 1.029  | 1.208 |
| gi_31342416_ref_NM_174286.2      | 281715 | CREB3            | cAMP responsive element binding protein 3                 | Nucleus   | transcription regulator | H  | -1.290 | 1.323 | 1.297  | 1.220 | 1.283  | 1.326 |
| gi_119891422_ref_XM_617403.3     | 537246 | TRIM24           | tripartite motif-containing 24                            | Nucleus   | transcription regulator | VH | -1.287 | 1.345 | 1.288  | 1.233 | 1.051  | 1.224 |
| gi_119915572_ref_XM_588389.3     | 539620 | ZKSCAN4          | zinc finger with KRAB and SCAN domains 4                  | Nucleus   | transcription regulator | H  | -1.284 | 1.323 | 1.210  | 1.249 | 1.188  | 1.332 |
| gi_31342081_ref_NM_174409.2      | 281961 | OSTF1            | osteoclast stimulating factor 1                           | Nucleus   | transcription regulator | VH | -1.284 | 1.353 | 1.035  | 1.151 | 1.007  | 1.178 |
| gi_157427809_ref_NM_001105341.1  | 507579 | TTRAP            | TRAF and TNF receptor associated protein                  | Cytoplasm | transcription regulator | H  | -1.283 | 1.312 | 1.038  | 1.076 | -1.408 | 0.093 |
| gi_125630704_ref_NM_001081540.1  | 540274 | RNF14            | ring finger protein 14                                    | Nucleus   | transcription regulator | VH | -1.281 | 1.321 | 1.209  | 1.257 | 1.283  | 1.325 |
| gi_119905583_ref_XM_585061.3     | 508301 | GMEB2            | glucocorticoid modulatory element binding protein 2       | Nucleus   | transcription regulator | H  | -1.273 | 1.325 | -1.328 | 0.176 | 1.058  | 1.251 |
| gi_83035114_ref_NM_001037619.1   | 613479 | GTF2A2           | general transcription factor IIA, 2, 12kDa                | Nucleus   | transcription regulator | VH | -1.264 | 1.305 | 1.173  | 1.246 | -1.071 | 0.877 |
| gi_118151003_ref_NM_001077955.1  | 522836 | ZNF394           | zinc finger protein 394                                   | Nucleus   | transcription regulator | H  | -1.260 | 1.320 | 1.025  | 1.096 | -1.012 | 1.107 |
| gi_157426912_ref_NM_001105257.1  | 541154 | IKZF1            | IKAROS family zinc finger 1 (Ikaros)                      | Nucleus   | transcription regulator | VH | -1.258 | 1.310 | -1.210 | 0.459 | 1.057  | 1.258 |
| gi_115495614_ref_NM_001075437.1  | 510204 | GABPA            | GA binding protein transcription factor, alpha subunit 6  | Nucleus   | transcription regulator | VH | -1.257 | 1.304 | 1.062  | 1.160 | -1.267 | 0.303 |
| gi_155372126_ref_NM_0011101203.1 | 540090 | RNF2             | ring finger protein 2                                     | Nucleus   | transcription regulator | VH | -1.257 | 1.310 | 1.301  | 1.227 | 1.162  | 1.334 |
| gi_119905771_ref_XM_615437.3     | 535369 | E2F1             | E2F transcription factor 1                                | Nucleus   | transcription regulator | H  | -1.254 | 1.313 | -1.577 | 0.017 | -1.473 | 0.059 |
| gi_78369499_ref_NM_001035307.1   | 515380 | EDF1             | endothelial differentiation-related factor 1              | Nucleus   | transcription regulator | VH | -1.254 | 1.318 | -1.028 | 1.024 | -1.121 | 0.776 |
| gi_119901393_ref_XM_615363.3     | 541264 | ZNF292           | zinc finger protein 292                                   | Nucleus   | transcription regulator | VH | -1.250 | 1.308 | 1.146  | 1.238 | 1.524  | 0.771 |
| gi_115496357_ref_NM_001076331.1  | 614509 | MXI1             | MAX interactor 1                                          | Nucleus   | transcription regulator | H  | -1.244 | 1.308 | 1.991  | 0.069 | 1.993  | 0.153 |
| gi_119895221_ref_XM_588589.3     | 511283 | ARID3A           | AT rich interactive domain 3A (BRIGHT-like)               | Nucleus   | transcription regulator | VH | -1.244 | 1.251 | -1.659 | 0.009 | -1.063 | 0.887 |
| gi_118150917_ref_NM_001077904.1  | 511407 | NR2C1            | nuclear receptor subfamily 2, group C, member 1           | Nucleus   | transcription regulator | VH | -1.244 | 1.314 | 1.273  | 1.244 | 1.218  | 1.342 |
| gi_119895547_ref_XM_590199.3     | 539896 | BRD8             | bromodomain containing 8                                  | Nucleus   | transcription regulator | VH | -1.234 | 1.272 | 1.277  | 1.250 | 1.216  | 1.342 |
| gi_157785622_ref_NM_001105633.1  | 540616 | MAX              | MYC associated factor X                                   | Nucleus   | transcription regulator | VH | -1.231 | 1.252 | 1.305  | 1.144 | 1.301  | 1.278 |
| gi_155372156_ref_NM_001101218.1  | 541143 | ZNF131           | zinc finger protein 131                                   | Nucleus   | transcription regulator | VH | -1.229 | 1.262 | 1.239  | 1.254 | 1.218  | 1.343 |
| gi_119902124_ref_XM_592917.3     | 514989 | SUPT16H          | suppressor of Ty 16 homolog (S. cerevisiae)               | Nucleus   | transcription regulator | VH | -1.221 | 1.253 | 1.199  | 1.255 | -1.022 | 1.080 |
| gi_119912222_ref_XM_581390.3     | 538601 | MLLT6            | myeloid/lymphoid or mixed-lineage leukemia (trithorax     | Nucleus   | transcription regulator | H  | -1.220 | 1.244 | -2.412 | 0.000 | 1.197  | 1.338 |

|                                  |           |          |                                                              |                 |                         |    |        |       |        |       |        |       |
|----------------------------------|-----------|----------|--------------------------------------------------------------|-----------------|-------------------------|----|--------|-------|--------|-------|--------|-------|
| gi_119906065_ref_XM_589621.3_    | 539807    | ZNFx1    | zinc finger, NFX1-type containing 1                          | Nucleus         | transcription regulator | VH | -1.220 | 1.262 | 1.916  | 0.092 | 2.979  | 0.005 |
| gi_119906434_ref_XM_588718.3_    | 511392    | TFG1     | trimethylguanosine synthase homolog (S. cerevisiae)          | Nucleus         | transcription regulator | VH | -1.219 | 1.231 | -1.289 | 0.252 | -1.390 | 0.118 |
| gi_77736142_ref_NM_001034598.1_  | 534003    | GCYC     | nuclear transcription factor Y, gamma                        | Nucleus         | transcription regulator | VH | -1.218 | 1.262 | 1.089  | 1.192 | 1.115  | 1.312 |
| gi_62751582_ref_NM_001015582.1_  | 512789    | BRF2     | BRF2, subunit of RNA polymerase III transcription initiation | Nucleus         | transcription regulator | VH | -1.215 | 1.282 | -1.058 | 0.963 | -1.062 | 0.964 |
| gi_119909136_ref_XM_591880.3_    | 540159    | ANKL2    | ankryrin repeat and LEM domain containing 2                  | Nucleus         | transcription regulator | H  | -1.215 | 1.273 | -1.021 | 1.049 | 1.055  | 1.248 |
| gi_157785560_ref_NM_001105614.1_ | 414274    | SMARCA4  | SWI/SNF related, matrix associated, actin dependent nuclear  | Nucleus         | transcription regulator | VH | -1.214 | 1.262 | -1.289 | 0.262 | -1.181 | 0.567 |
| gi_119920411_ref_XM_001252291.1_ | 784529    | BCOR     | BCL6 co-repressor                                            | Nucleus         | transcription regulator | VH | -1.206 | 1.239 | 1.052  | 1.154 | 1.372  | 1.129 |
| gi_119892198_ref_XM_583302.3_    | 506805    | MLL2     | myeloid/lymphoid or mixed-lineage leukemia 2                 | Nucleus         | transcription regulator | H  | -1.205 | 1.214 | -1.930 | 0.004 | 1.927  | 0.194 |
| gi_84000108_ref_NM_001038064.1_  | 509259    | GTF2F2   | general transcription factor IIF, polypeptide 2, 30kDa       | Nucleus         | transcription regulator | H  | -1.203 | 1.225 | 1.250  | 1.251 | -1.273 | 0.279 |
| gi_115496329_ref_NM_001075824.1_ | 521975    | TRIM32   | tripartite motif-containing 32                               | Nucleus         | transcription regulator | H  | -1.202 | 1.229 | 1.305  | 1.173 | 1.068  | 1.233 |
| gi_114051220_ref_NM_001046028.1_ | 509327    | TAF7     | TAF7 RNA polymerase II, TATA box binding protein (TE)        | Nucleus         | transcription regulator | VH | -1.202 | 1.244 | 1.242  | 1.251 | 1.223  | 1.343 |
| gi_119910227_ref_XM_877976.2_    | 538523    | NFAT5    | nuclear factor of activated T-cells 5, tonicity-responsive   | Nucleus         | transcription regulator | H  | -1.200 | 1.071 | 1.922  | 0.066 | 2.842  | 0.008 |
| gi_119908459_ref_XM_618469.3_    | 538270    | MB2      | mindbomb homolog 2 (Drosophila)                              | Nucleus         | transcription regulator | H  | -1.198 | 1.173 | -1.245 | 0.347 | 1.611  | 0.588 |
| gi_119910191_ref_XM_866255.2_    | 614678    | CBFB     | core-binding factor, beta subunit                            | Nucleus         | transcription regulator | VH | -1.198 | 1.251 | -1.103 | 0.827 | -1.138 | 0.707 |
| gi_66792717_ref_NM_001024499.1_  | 508049    | POLR3D   | polymerase (RNA) III (DNA directed) polypeptide D, 44        | Nucleus         | transcription regulator | VH | -1.198 | 1.189 | -1.103 | 0.781 | -1.233 | 0.401 |
| gi_114051068_ref_NM_001046493.1_ | 540859    | TCEB1    | transcription elongation factor B (SIII), polypeptide 1      | Nucleus         | transcription regulator | VH | -1.198 | 1.184 | -1.105 | 0.710 | -1.491 | 0.046 |
| gi_119908419_ref_XM_864814.2_    | 534608    | ZBTB48   | zinc finger and BTB domain containing 48                     | Nucleus         | transcription regulator | H  | -1.197 | 1.231 | 1.075  | 1.157 | 1.207  | 1.343 |
| gi_115749623_ref_NM_001076181.2_ | 536966    | HEXIM1   | hexamethylene bis-acetamide inducible 1                      | Nucleus         | transcription regulator | VH | -1.197 | 1.233 | -1.006 | 1.075 | 1.001  | 1.129 |
| gi_119920178_ref_XM_599229.3_    | 520974    | MED12    | mediator complex subunit 12                                  | Nucleus         | transcription regulator | VH | -1.197 | 1.156 | -1.013 | 0.999 | 1.582  | 0.642 |
| gi_119901950_ref_XM_592679.3_    | 540252    | FEM1B    | fem-1 homolog b (C. elegans)                                 | Nucleus         | transcription regulator | VH | -1.192 | 1.206 | 1.124  | 1.227 | 1.157  | 1.328 |
| gi_118150783_ref_NM_001077834.1_ | 326578    | SNW1     | SNW domain containing 1                                      | Nucleus         | transcription regulator | VH | -1.188 | 1.204 | 1.151  | 1.245 | 1.080  | 1.273 |
| gi_119916003_ref_XM_615234.3_    | 535214    | ZNF236   | zinc finger protein 236                                      | Nucleus         | transcription regulator | H  | -1.183 | 1.209 | -1.184 | 0.455 | 1.343  | 1.185 |
| gi_119920196_ref_XM_580963.3_    | 504792    | TAF1     | TAF1 RNA polymerase II, TATA box binding protein (TE)        | Nucleus         | transcription regulator | VH | -1.183 | 1.189 | -1.002 | 1.052 | 1.200  | 1.341 |
| gi_134085694_ref_NM_001083482.1_ | 534722    | PIAS4    | protein inhibitor of activated STAT, 4                       | Nucleus         | transcription regulator | VH | -1.179 | 1.215 | -1.194 | 0.532 | 1.049  | 1.244 |
| gi_119893140_ref_XM_584665.3_    | 507962    | KDM5A    | lysine (K)-specific demethylase 5A                           | Nucleus         | transcription regulator | VH | -1.176 | 1.201 | -1.104 | 0.718 | 1.324  | 1.272 |
| gi_119888429_ref_XM_872705.2_    | 511573    | ZNF142   | zinc finger protein 142                                      | Nucleus         | transcription regulator | H  | -1.172 | 1.198 | -1.205 | 0.352 | 1.039  | 1.214 |
| gi_149642766_ref_NM_001099116.1_ | 540910    | SMARCE1  | SWI/SNF related, matrix associated, actin dependent nuclear  | Nucleus         | transcription regulator | VH | -1.172 | 1.156 | 1.045  | 1.161 | -1.039 | 1.021 |
| gi_115749615_ref_NM_001035080.2_ | 509960    | MTF1     | metal-regulatory transcription factor 1                      | Nucleus         | transcription regulator | VH | -1.171 | 1.203 | -1.152 | 0.674 | -1.178 | 0.587 |
| gi_78369295_ref_NM_001035497.1_  | 617771    | UBE2V1   | ubiquitin-conjugating enzyme E2 variant 1                    | Nucleus         | transcription regulator | VH | -1.170 | 1.187 | 1.155  | 1.245 | 1.084  | 1.288 |
| gi_157428099_ref_NM_001105488.1_ | 100125917 | RFXANK   | regulatory factor X-associated ankryrin-containing protein   | Nucleus         | transcription regulator | VH | -1.168 | 1.172 | 1.214  | 1.254 | 1.421  | 1.022 |
| gi_134085660_ref_NM_001083397.1_ | 509448    | TFCP2    | transcription factor CP2                                     | Nucleus         | transcription regulator | VH | -1.167 | 1.174 | 1.275  | 1.242 | 1.324  | 1.242 |
| gi_119917332_ref_XM_871229.2_    | 618914    | MAFK     | v-maf musculoaponeurotic fibrosarcoma oncogene homolog       | Nucleus         | transcription regulator | H  | -1.166 | 1.184 | -1.786 | 0.002 | -1.772 | 0.005 |
| gi_114052335_ref_NM_001046350.1_ | 533382    | PKNOX1   | PBX/knotted 1 homeobox 1                                     | Nucleus         | transcription regulator | H  | -1.163 | 1.149 | 1.146  | 1.235 | 1.073  | 1.243 |
| gi_119920764_ref_XM_605445.3_    | 527058    | RLF      | rearranged L-myc fusion                                      | Nucleus         | transcription regulator | H  | -1.163 | 1.152 | 1.336  | 1.116 | 1.203  | 1.342 |
| gi_119917839_ref_XM_866668.2_    | 614540    | TIAL1    | TIA1 cytotoxic granule-associated RNA binding protein        | Nucleus         | transcription regulator | VH | -1.163 | 1.193 | 1.131  | 1.247 | -1.022 | 1.080 |
| gi_153792752_ref_NM_001046074.2_ | 511077    | MYC      | v-myc myelocytomatosis viral oncogene homolog (avia)         | Nucleus         | transcription regulator | VH | -1.162 | 1.175 | 1.301  | 1.230 | 1.138  | 1.332 |
| gi_78369233_ref_NM_001035268.1_  | 505177    | ZNF207   | zinc finger protein 207                                      | Nucleus         | transcription regulator | VH | -1.162 | 1.150 | 1.211  | 1.257 | 1.113  | 1.304 |
| gi_156120408_ref_NM_001101880.1_ | 507148    | REST     | RE1-silencing transcription factor                           | Nucleus         | transcription regulator | H  | -1.160 | 1.123 | 1.354  | 1.088 | 1.115  | 1.293 |
| gi_119918095_ref_XM_874513.2_    | 404141    | ING2     | inhibitor of growth family, member 2                         | Nucleus         | transcription regulator | H  | -1.154 | 1.172 | 1.284  | 1.237 | 1.084  | 1.247 |
| gi_114052217_ref_NM_001045925.1_ | 505722    | TCEA1    | transcription elongation factor A (SII), 1                   | Nucleus         | transcription regulator | VH | -1.154 | 1.126 | 1.108  | 1.199 | 1.083  | 1.263 |
| gi_134085756_ref_NM_001083392.1_ | 508522    | GPN1     | GPN-loop GTPase 1                                            | Nucleus         | transcription regulator | VH | -1.153 | 1.140 | 1.031  | 1.130 | -1.288 | 0.278 |
| gi_148228870_ref_NM_001098117.1_ | 540648    | BCLAF1   | BCL2-associated transcription factor 1                       | Nucleus         | transcription regulator | VH | -1.152 | 1.155 | 1.035  | 1.153 | -1.021 | 1.106 |
| gi_119905975_ref_XM_602010.3_    | 523707    | NCOA3    | nuclear receptor coactivator 3                               | Nucleus         | transcription regulator | VH | -1.152 | 1.131 | 1.432  | 0.839 | 1.968  | 0.167 |
| gi_77735506_ref_NM_001034276.1_  | 507047    | TAF11    | TAF11 RNA polymerase II, TATA box binding protein (T)        | Nucleus         | transcription regulator | H  | -1.151 | 1.152 | 1.031  | 1.138 | -1.431 | 0.089 |
| gi_119908977_ref_XR_027764.1_    | 536676    | NARG1    | NMDA receptor regulated 1                                    | Nucleus         | transcription regulator | VH | -1.148 | 1.130 | 1.082  | 1.199 | 1.034  | 1.211 |
| gi_115497643_ref_XM_001075582.1_ | 512840    | POU2F1   | POU class 2 homeobox 1                                       | Nucleus         | transcription regulator | VH | -1.148 | 1.140 | 1.112  | 1.234 | 1.116  | 1.325 |
| gi_119912200_ref_XM_869372.2_    | 505147    | PCGF2    | polycomb group ring finger 2                                 | Nucleus         | transcription regulator | VH | -1.147 | 1.152 | 1.231  | 1.253 | 1.376  | 1.150 |
| gi_149642818_ref_NM_001098968.1_ | 514443    | TAF10    | TAF10 RNA polymerase II, TATA box binding protein (T)        | Nucleus         | transcription regulator | VH | -1.144 | 1.131 | -1.419 | 0.073 | -1.398 | 0.119 |
| gi_114326277_ref_XM_174532.3_    | 282215    | DNAJB6   | DnaJ (Hsp40) homolog, subfamily B, member 6                  | Nucleus         | transcription regulator | H  | -1.143 | 1.126 | -1.475 | 0.039 | -1.713 | 0.007 |
| gi_119907617_ref_XM_617789.3_    | 537616    | POLD3    | polymerase (DNA-directed), delta 3, accessory subunit        | Nucleus         | transcription regulator | VH | -1.140 | 1.115 | -1.178 | 0.571 | -1.672 | 0.009 |
| gi_119918701_ref_XM_001250854.1_ | 510059    | TFAM     | transcription factor A, mitochondrial                        | Cytoplasm       | transcription regulator | VH | -1.138 | 1.096 | -1.012 | 1.042 | -1.178 | 0.553 |
| gi_139947655_ref_NM_001083689.1_ | 515903    | FOXP1    | forkhead box P1                                              | Nucleus         | transcription regulator | VH | -1.135 | 1.103 | 1.299  | 1.233 | 1.441  | 0.990 |
| gi_119889347_ref_XM_584127.3_    | 538995    | ETV3     | ets variant 3                                                | Nucleus         | transcription regulator | H  | -1.129 | 1.063 | -1.773 | 0.005 | 1.078  | 1.259 |
| gi_119904710_ref_XM_001250984.1_ | 507091    | MPHOSPH8 | M-phase phosphoprotein 8                                     | Nucleus         | transcription regulator | VH | -1.129 | 1.101 | 1.019  | 1.134 | -1.103 | 0.789 |
| gi_115496186_ref_NM_001076214.1_ | 540345    | DRAP1    | DR1-associated protein 1 (negative cofactor 2 alpha)         | Nucleus         | transcription regulator | VH | -1.128 | 1.099 | -1.114 | 0.783 | -1.120 | 0.782 |
| gi_119895256_ref_XM_592234.3_    | 540197    | NSD1     | nuclear receptor binding SET domain protein 1                | Nucleus         | transcription regulator | VH | -1.127 | 1.082 | 1.020  | 1.059 | 1.651  | 0.527 |
| gi_119889584_ref_XM_001250499.1_ | 533296    | TRIM33   | tripartite motif-containing 33                               | Nucleus         | transcription regulator | VH | -1.127 | 1.092 | 1.086  | 1.206 | 1.185  | 1.341 |
| gi_149643026_ref_NM_001098960.1_ | 513602    | HDAC6    | histone deacetylase 6                                        | Nucleus         | transcription regulator | H  | -1.123 | 1.006 | 1.237  | 1.257 | 1.062  | 1.215 |
| gi_75832104_ref_NM_001014916.2_  | 513312    | NACA     | nascent polypeptide-associated complex alpha subunit         | Nucleus         | transcription regulator | VH | -1.121 | 1.077 | 1.033  | 1.142 | 1.044  | 1.235 |
| gi_84000392_ref_NM_001038212.1_  | 616311    | PMF1     | polyamine-modulated factor 1                                 | Nucleus         | transcription regulator | H  | -1.120 | 0.970 | 1.023  | 0.976 | -1.162 | 0.617 |
| gi_77735780_ref_NM_001034413.1_  | 511852    | ASB11    | ankryrin repeat and SOCS box-containing 11                   | Nucleus         | transcription regulator | H  | -1.119 | 1.058 | -1.226 | 0.375 | -1.260 | 0.347 |
| gi_114053212_ref_NM_001046271.1_ | 524184    | ECD      | ecdysoneless homolog (Drosophila)                            | Nucleus         | transcription regulator | H  | -1.119 | 1.066 | 1.253  | 1.251 | -1.066 | 0.939 |
| gi_114051857_ref_NM_001045960.1_ | 507187    | TCEAL1   | transcription elongation factor A (SII)-like 1               | Nucleus         | transcription regulator | H  | -1.118 | 1.025 | 1.829  | 0.164 | 1.717  | 0.418 |
| gi_31341991_ref_NM_174441.2_     | 282015    | PSMCS5   | proteasome (prosome, macropain) 26S subunit, ATPase          | Nucleus         | transcription regulator | VH | -1.117 | 1.061 | -1.193 | 0.505 | -1.204 | 0.475 |
| gi_119891154_ref_XM_863839.2_    | 537266    | ZMIZ2    | zinc finger, MIZ-type containing 2                           | Nucleus         | transcription regulator | H  | -1.113 | 1.040 | -1.019 | 1.021 | 1.875  | 0.239 |
| gi_119894912_ref_XM_580591.3_    | 504458    | MLLT1    | myeloid/lymphoid or mixed-lineage leukemia (trithorax)       | Nucleus         | transcription regulator | VH | -1.112 | 1.026 | -1.196 | 0.485 | 1.013  | 1.139 |
| gi_115495158_ref_NM_001075975.1_ | 532936    | TAF9     | TAF9 RNA polymerase II, TATA box binding protein (TE)        | Nucleus         | transcription regulator | VH | -1.112 | 1.025 | 1.132  | 1.229 | -1.006 | 1.105 |
| gi_77736302_ref_NM_001034679.1_  | 539640    | RCAN1    | regulator of calcineurin 1                                   | Nucleus         | transcription regulator | H  | -1.111 | 1.053 | 1.731  | 0.255 | 1.372  | 1.128 |
| gi_77735398_ref_NM_001034224.1_  | 504831    | CNPB     | CCHG-type zinc finger, nucleic acid binding protein          | Nucleus         | transcription regulator | VH | -1.109 | 1.032 | -1.084 | 0.852 | -1.112 | 0.742 |
| gi_119889486_ref_XM_867242.2_    | 513730    | NOTCH2   | Notch homolog 2 (Drosophila)                                 | Plasma Membrane | transcription regulator | H  | -1.107 | 0.946 | -1.971 | 0.002 | 1.316  | 1.224 |
| gi_119916782_ref_XM_594080.3_    | 515964    | RRN3     | RRN3 RNA polymerase I transcription factor homolog (Nucleus) | Nucleus         | transcription regulator | H  | -1.107 | 0.939 | 1.041  | 1.151 | 1.002  | 1.154 |
| gi_116003916_ref_NM_001076846.1_ | 513562    | FUBP1    | far upstream element (FUSE) binding protein 1                | Nucleus         | transcription regulator | VH | -1.105 | 1.025 | 1.089  | 1.215 | 1.007  | 1.160 |
| gi_119908534_ref_XM_591419.3_    | 513692    | SPEN     | spen homolog, transcriptional regulator (Drosophila)         | Nucleus         | transcription regulator | VH | -1.105 | 1.055 | -1.366 | 0.109 | 1.298  | 1.318 |
| gi_155372154_ref_NM_001101217.1_ | 541080    | FUBP3    | far upstream element (FUSE) binding protein 3                | Nucleus         | transcription regulator | H  | -1.104 | 1.030 | 1.126  | 1.244 | 1.186  | 1.341 |

|                                  |        |                  |                                                           |           |                         |    |        |       |        |       |        |       |
|----------------------------------|--------|------------------|-----------------------------------------------------------|-----------|-------------------------|----|--------|-------|--------|-------|--------|-------|
| gi_122692288_ref_NM_001080214.1_ | 281148 | ETS2             | v-ets erythroblastosis virus E26 oncogene homolog 2 (     | Nucleus   | transcription regulator | H  | -1.099 | 1.005 | -1.704 | 0.005 | -1.751 | 0.005 |
| gi_119909659_ref_XM_583272.3_    | 506776 | LZTR1            | leucine zipper-like transcription regulator 1             | Cytoplasm | transcription regulator | H  | -1.097 | 1.018 | -1.569 | 0.019 | -1.039 | 1.006 |
| gi_119902222_ref_XM_866403.2_    | 614181 | HOMEZ            | homeobox and leucine zipper encoding                      |           | transcription regulator | H  | -1.095 | 0.949 | 1.668  | 0.334 | 1.832  | 0.279 |
| gi_119906753_ref_XM_001250052.1_ | 782052 | LOC100046341     | basic transcription factor 3 pseudogene                   | unknown   | transcription regulator | VH | -1.095 | 0.789 | 1.155  | 1.174 | 1.085  | 1.159 |
| gi_119891667_ref_XM_865659.2_    | 509106 | EZH2             | enhancer of zeste homolog 2 (Drosophila)                  | Nucleus   | transcription regulator | VH | -1.093 | 0.907 | 1.079  | 1.181 | -1.358 | 0.161 |
| gi_119906877_ref_XM_001250150.1_ | 781912 | TAF2             | TAF2 RNA polymerase II, TATA box binding protein (TE      | Nucleus   | transcription regulator | VH | -1.091 | 0.951 | -1.059 | 0.924 | -1.191 | 0.511 |
| gi_119903945_ref_XM_001250691.1_ | 782101 | COPS2            | COP9 constitutive photomorphogenic homolog subunit        | Cytoplasm | transcription regulator | H  | -1.090 | 0.934 | 1.194  | 1.247 | -1.400 | 0.107 |
| gi_149642570_ref_NM_001099088.1_ | 538594 | CREBZF           | CREB/ATF bZIP transcription factor                        | Nucleus   | transcription regulator | H  | -1.090 | 1.003 | 1.118  | 1.227 | 1.347  | 1.218 |
| gi_70778872_ref_NM_001025314.1_  | 281031 | BTF3             | basic transcription factor 3                              | Nucleus   | transcription regulator | VH | -1.090 | 0.980 | 1.159  | 1.252 | 1.044  | 1.238 |
| gi_119910805_ref_XM_593712.3_    | 515654 | ATF5             | activating transcription factor 5                         | Nucleus   | transcription regulator | H  | -1.089 | 0.970 | -1.728 | 0.006 | 1.393  | 1.096 |
| gi_77736488_ref_NM_001034772.1_  | 614915 | HMGN1            | high-mobility group nucleosome binding domain 1           | Nucleus   | transcription regulator | VH | -1.086 | 0.854 | 1.025  | 1.063 | -1.134 | 0.612 |
| gi_114051246_ref_NM_001046196.1_ | 515320 | HBP1             | HMG-box transcription factor 1                            | Nucleus   | transcription regulator | H  | -1.085 | 0.898 | 2.174  | 0.028 | 2.253  | 0.057 |
| gi_119890471_ref_XM_581483.3_    | 505228 | THRAP3           | thyroid hormone receptor associated protein 3             | Nucleus   | transcription regulator | VH | -1.084 | 0.967 | 1.101  | 1.227 | 1.185  | 1.341 |
| gi_119891865_ref_XM_590763.3_    | 513125 | ATN1             | atrophin 1                                                | Nucleus   | transcription regulator | VH | -1.083 | 0.957 | -1.347 | 0.144 | 1.454  | 0.954 |
| gi_147906545_ref_NM_001097995.1_ | 507659 | TSG101           | tumor susceptibility gene 101                             | Nucleus   | transcription regulator | VH | -1.083 | 0.932 | -1.173 | 0.563 | -1.132 | 0.720 |
| gi_119912207_ref_XM_598984.3_    | 520734 | MED1             | mediator complex subunit 1                                | Nucleus   | transcription regulator | VH | -1.082 | 0.941 | 1.006  | 1.085 | 1.006  | 1.141 |
| gi_119893309_ref_XM_601446.3_    | 523151 | TCF20            | transcription factor 20 (AR1)                             | Nucleus   | transcription regulator | H  | -1.081 | 0.861 | -2.002 | 0.002 | 1.488  | 0.786 |
| gi_147902867_ref_NM_001098050.1_ | 521194 | MAML2            | mastermind-like 2 (Drosophila)                            | Nucleus   | transcription regulator | VH | -1.079 | 0.955 | 1.044  | 1.141 | 1.040  | 1.226 |
| gi_115496729_ref_NM_001076365.1_ | 615330 | YEATS4           | YEATS domain containing 4                                 | Nucleus   | transcription regulator | VH | -1.077 | 0.843 | 1.170  | 1.242 | -1.141 | 0.611 |
| gi_134085919_ref_NM_001083450.1_ | 527134 | LRCH4            | leucine-rich repeats and calponin homology (CH) dom       | Cytoplasm | transcription regulator | VH | -1.076 | 0.917 | -1.820 | 0.002 | 1.155  | 1.334 |
| gi_149642736_ref_XR_027800.1_    | 506331 | MED26            | mediator complex subunit 26                               | Nucleus   | transcription regulator | H  | -1.075 | 0.903 | -1.067 | 0.926 | -1.112 | 0.782 |
| gi_119904546_ref_XM_583090.3_    | 506618 | FOXO1            | forkhead box O1                                           | Nucleus   | transcription regulator | VH | -1.073 | 0.949 | -1.590 | 0.015 | -1.150 | 0.691 |
| gi_77736446_ref_NM_001034751.1_  | 614212 | LMO4             | LIM domain only 4                                         | Nucleus   | transcription regulator | VH | -1.071 | 0.920 | 1.321  | 1.180 | 1.269  | 1.333 |
| gi_149642796_ref_NM_001099041.1_ | 528606 | EHMT1            | euchromatic histone-lysine N-methyltransferase 1          | Nucleus   | transcription regulator | VH | -1.070 | 0.875 | -1.119 | 0.730 | 1.028  | 1.173 |
| gi_115495582_ref_NM_001076152.1_ | 539270 | ABT1             | activator of basal transcription 1                        | Nucleus   | transcription regulator | VH | -1.068 | 0.921 | -1.078 | 0.890 | -1.427 | 0.087 |
| gi_119907199_ref_XR_027800.1_    | 541023 | ZNF202           | zinc finger protein 202                                   | Nucleus   | transcription regulator | H  | -1.067 | 0.882 | 1.017  | 1.006 | 1.283  | 1.327 |
| gi_115495282_ref_NM_001075942.1_ | 530908 | CREG1            | cellular repressor of E1A-stimulated genes 1              | Nucleus   | transcription regulator | H  | -1.066 | 0.897 | 2.174  | 0.028 | 1.883  | 0.237 |
| gi_147898440_ref_NM_001098002.1_ | 509232 | NRF1             | nuclear respiratory factor 1                              | Nucleus   | transcription regulator | H  | -1.064 | 0.799 | -1.048 | 0.938 | 1.042  | 1.186 |
| gi_27806886_ref_NM_173912.1_     | 280796 | FUS              | fusion (involved in t(12;16) in malignant liposarcoma)    | Nucleus   | transcription regulator | VH | -1.064 | 0.846 | -1.086 | 0.795 | -1.209 | 0.432 |
| gi_84370084_ref_NM_001038530.1_  | 511829 | GTF2H2           | general transcription factor IIH, polypeptide 2, 44kDa    | Nucleus   | transcription regulator | VH | -1.062 | 0.904 | 1.287  | 1.241 | 1.073  | 1.268 |
| gi_115497917_ref_NM_001075610.1_ | 513297 | L3MBTL2          | (3)mbl-like 2 (Drosophila)                                | Nucleus   | transcription regulator | H  | -1.061 | 0.883 | -1.263 | 0.313 | -1.192 | 0.509 |
| gi_31343070_ref_NM_174000.2_     | 281036 | CALR             | calreticulin                                              | Cytoplasm | transcription regulator | VH | -1.061 | 0.866 | 1.025  | 1.092 | -1.046 | 1.007 |
| gi_118151443_ref_NM_001078163.1_ | 777788 | DDIT3            | DNA-damage-inducible transcript 3                         | Nucleus   | transcription regulator | H  | -1.058 | 0.871 | 1.408  | 0.918 | 2.398  | 0.033 |
| gi_94966888_ref_NM_001040546.1_  | 525389 | MED27            | mediator complex subunit 27                               | Nucleus   | transcription regulator | VH | -1.058 | 0.857 | -1.033 | 1.000 | -1.101 | 0.797 |
| gi_114051533_ref_NM_001046589.1_ | 617018 | RNF4             | ring finger protein 4                                     | Nucleus   | transcription regulator | VH | -1.058 | 0.829 | -1.056 | 0.929 | -1.093 | 0.846 |
| gi_119909418_ref_XM_615157.3_    | 535152 | DDX54            | DEAD (Asp-Glu-Ala-Asp) box polypeptide 54                 | Nucleus   | transcription regulator | H  | -1.057 | 0.854 | -1.250 | 0.357 | -1.321 | 0.226 |
| gi_119916790_ref_XM_588800.3_    | 511461 | MKL2             | MKL/myocardin-like 2                                      | Nucleus   | transcription regulator | H  | -1.056 | 0.859 | 1.561  | 0.542 | 1.587  | 0.648 |
| gi_117935054_ref_NM_174339.3_    | 281814 | HIF1A            | hypoxia inducible factor 1, alpha subunit (basic helix-lo | Nucleus   | transcription regulator | VH | -1.056 | 0.859 | -1.084 | 0.830 | 1.137  | 1.326 |
| gi_83035094_ref_NM_001037616.1_  | 540444 | HMGB2            | high-mobility group box 2                                 | Nucleus   | transcription regulator | VH | -1.056 | 0.861 | -1.148 | 0.671 | -1.191 | 0.528 |
| gi_156120704_ref_NM_001102029.1_ | 515680 | NFX1             | nuclear transcription factor, X-box binding 1             | Nucleus   | transcription regulator | VH | -1.056 | 0.865 | 1.127  | 1.237 | 1.072  | 1.262 |
| gi_30466259_ref_NM_178573.1_     | 353120 | BRCA1            | breast cancer 1, early onset                              | Nucleus   | transcription regulator | VH | -1.055 | 0.803 | 1.019  | 1.092 | -1.352 | 0.163 |
| gi_119889005_ref_XM_001254027.1_ | 524645 | DCAF6            | DDB1 and CUL4 associated factor 6                         | Nucleus   | transcription regulator | H  | -1.054 | 0.854 | 1.277  | 1.241 | 1.138  | 1.327 |
| gi_119917147_ref_XM_585218.3_    | 508442 | BAZ1B            | bromodomain adjacent to zinc finger domain, 1B            | Nucleus   | transcription regulator | VH | -1.052 | 0.815 | -1.395 | 0.077 | 1.091  | 1.280 |
| gi_156120490_ref_NM_001101921.1_ | 510084 | ANKRD10          | ankyrin repeat domain 10                                  | Nucleus   | transcription regulator | H  | -1.048 | 0.790 | -1.075 | 0.801 | -1.032 | 0.986 |
| gi_119896053_ref_XM_001249429.1_ | 781150 | SAP30            | Sin3A-associated protein, 30kDa                           | Nucleus   | transcription regulator | VH | -1.045 | 0.827 | 1.115  | 1.227 | -1.528 | 0.034 |
| gi_119914774_ref_XR_028584.1_    | 522045 | SMARCC1          | SWI/SNF related, matrix associated, actin dependent r     | Nucleus   | transcription regulator | VH | -1.045 | 0.759 | -1.076 | 0.770 | 1.007  | 1.113 |
| gi_118601877_ref_NM_001079642.1_ | 780787 | SRA1             | steroid receptor RNA activator 1                          | Nucleus   | transcription regulator | H  | -1.044 | 0.803 | -1.100 | 0.796 | 1.073  | 1.255 |
| gi_119910728_ref_XM_593095.2_    | 540310 | GRLF1            | glucocorticoid receptor DNA binding factor 1              | Nucleus   | transcription regulator | VH | -1.043 | 0.791 | -2.427 | 0.000 | 1.173  | 1.332 |
| gi_77735442_ref_NM_001034244.1_  | 505401 | TADA2A           | transcriptional adaptor 2A                                | Nucleus   | transcription regulator | VH | -1.043 | 0.752 | 1.295  | 1.238 | 1.089  | 1.270 |
| gi_156120910_ref_NM_001102132.1_ | 530776 | LASS5            | LAG1 homolog, ceramide synthase 5                         | Cytoplasm | transcription regulator | VH | -1.042 | 0.721 | -1.072 | 0.868 | -1.089 | 0.787 |
| gi_119905848_ref_XM_585747.3_    | 508899 | NCOA6            | nuclear receptor coactivator 6                            | Nucleus   | transcription regulator | VH | -1.041 | 0.827 | 1.180  | 1.254 | 1.400  | 1.101 |
| gi_119923843_ref_XM_585257.3_    | 508477 | ZNF593           | zinc finger protein 593                                   | Nucleus   | transcription regulator | H  | -1.039 | 0.594 | -1.257 | 0.168 | -1.404 | 0.067 |
| gi_119917684_ref_XM_604843.3_    | 526472 | LDB1             | LIM domain binding 1                                      | Nucleus   | transcription regulator | VH | -1.039 | 0.795 | 1.090  | 1.201 | 1.416  | 1.048 |
| gi_78369455_ref_NM_001035441.1_  | 614028 | NPM1 (includes E | nucleoposmin 1                                            | Nucleus   | transcription regulator | VH | -1.039 | 0.759 | 1.033  | 1.111 | -1.005 | 1.098 |
| gi_119887281_ref_XM_613744.3_    | 407215 | KAT2B            | K(lysine) acetyltransferase 2B                            | Nucleus   | transcription regulator | H  | -1.038 | 0.798 | 1.233  | 1.257 | 1.063  | 1.262 |
| gi_77736563_ref_NM_001034792.1_  | 616425 | SUPT4H1          | suppressor of Ty 4 homolog 1 (S. cerevisiae)              | Nucleus   | transcription regulator | VH | -1.036 | 0.752 | -1.294 | 0.216 | -1.324 | 0.200 |
| gi_73853757_ref_NM_174492.2_     | 282126 | YWHAH            | tyrosine 3-monooxygenase/tryptophan 5-monooxygenase       | Cytoplasm | transcription regulator | VH | -1.035 | 0.815 | -1.038 | 1.009 | -1.184 | 0.568 |
| gi_134085692_ref_NM_001083533.1_ | 789710 | KLF13            | Kruppel-like factor 13                                    | Nucleus   | transcription regulator | H  | -1.033 | 0.740 | -1.342 | 0.150 | 1.030  | 1.184 |
| gi_119912595_ref_XM_610873.3_    | 532359 | FOXK2            | forkhead box K2                                           | Nucleus   | transcription regulator | VH | -1.032 | 0.751 | -1.155 | 0.594 | -1.117 | 0.745 |
| gi_114050744_ref_NM_001046475.1_ | 540374 | GMEB2            | glucocorticoid modulatory element binding protein 1       | Nucleus   | transcription regulator | H  | -1.031 | 0.688 | -1.041 | 0.971 | 1.098  | 1.288 |
| gi_119915495_ref_XM_869170.2_    | 514062 | EHMT2            | euchromatic histone-lysine N-methyltransferase 2          | Nucleus   | transcription regulator | H  | -1.030 | 0.759 | -1.351 | 0.136 | 1.832  | 0.278 |
| gi_114051601_ref_NM_001046442.1_ | 538775 | KHDRBS1          | KH domain containing, RNA binding, signal transductio     | Nucleus   | transcription regulator | VH | -1.030 | 0.781 | 1.164  | 1.252 | 1.019  | 1.189 |
| gi_157427939_ref_NM_001105407.1_ | 533984 | SUB1             | SUB1 homolog (S. cerevisiae)                              | Nucleus   | transcription regulator | H  | -1.029 | 0.737 | 1.255  | 1.250 | 1.041  | 1.159 |
| gi_118151211_ref_NM_001078062.1_ | 616553 | PFN1             | prelamin subunit 1                                        | Cytoplasm | transcription regulator | VH | -1.028 | 0.734 | -1.382 | 0.098 | -1.566 | 0.023 |
| gi_156121302_ref_NM_001102329.1_ | 782752 | GTF3C2           | general transcription factor IIIC, polypeptide 2, beta 11 | Nucleus   | transcription regulator | VH | -1.026 | 0.748 | -1.008 | 1.065 | 1.079  | 1.285 |
| gi_115494903_ref_NM_001076209.1_ | 540248 | SMAD4            | SMAD family member 4                                      | Nucleus   | transcription regulator | VH | -1.026 | 0.759 | 1.073  | 1.193 | -1.020 | 1.051 |
| gi_115497821_ref_NM_001076452.1_ | 617269 | ASB8             | ankyrin repeat and SOCS box-containing 8                  | Nucleus   | transcription regulator | H  | -1.024 | 0.698 | 1.409  | 0.821 | 1.587  | 0.630 |
| gi_119894504_ref_XM_583044.3_    | 506578 | ELL              | elongation factor RNA polymerase II                       | Nucleus   | transcription regulator | H  | -1.024 | 0.718 | -1.128 | 0.714 | -1.045 | 0.968 |
| gi_119888577_ref_XM_001253150.1_ | 786336 | PTMA (includes E | plongosin, alpha                                          | Nucleus   | transcription regulator | VH | -1.023 | 0.741 | 1.065  | 1.170 | -1.047 | 0.980 |
| gi_119895456_ref_XM_589487.3_    | 512048 | REXO1            | REX1, RNA exonuclease 1 homolog (S. cerevisiae)           | Nucleus   | transcription regulator | H  | -1.021 | 0.687 | -2.922 | 0.000 | -1.240 | 0.360 |
| gi_134085770_ref_NM_001083395.1_ | 508663 | ZNF277           | zinc finger protein 277                                   | Nucleus   | transcription regulator | H  | -1.020 | 0.726 | 1.264  | 1.171 | 1.107  | 1.298 |
| gi_148230363_ref_NM_001098064.1_ | 527471 | HNRNPD           | heterogeneous nuclear ribonucleoprotein D (AU-rich el     | Nucleus   | transcription regulator | VH | -1.018 | 0.698 | -1.004 | 1.064 | -1.067 | 0.938 |
| gi_160333190_ref_NM_001034730.2_ | 541303 | MED17            | mediator complex subunit 17                               | Nucleus   | transcription regulator | VH | -1.017 | 0.718 | 1.011  | 1.092 | -1.376 | 0.142 |
| gi_115496895_ref_NM_001075188.1_ | 505102 | NFKBIL2          | nuclear factor of kappa light polypeptide gene enhance    | Cytoplasm | transcription regulator | H  | -1.015 | 0.693 | -1.507 | 0.033 | -1.141 | 0.663 |

|                                 |        |                 |                                                           |           |                         |    |        |       |        |       |        |       |
|---------------------------------|--------|-----------------|-----------------------------------------------------------|-----------|-------------------------|----|--------|-------|--------|-------|--------|-------|
| gi_125991889_ref_NM_001081614.1 | 541229 | SF1             | splicing factor 1                                         | Nucleus   | transcription regulator | VH | -1.015 | 0.710 | 1.009  | 1.098 | 1.078  | 1.232 |
| gi_119894806_ref_XM_592855.3    | 614936 | ILF3            | interleukin enhancer binding factor 3, 90kDa              | Nucleus   | transcription regulator | VH | -1.013 | 0.716 | -1.113 | 0.793 | -1.021 | 1.089 |
| gi_77736218_ref_NM_001034638.1  | 537402 | RBBP7           | retinoblastoma binding protein 7                          | Nucleus   | transcription regulator | VH | -1.013 | 0.692 | 1.024  | 1.096 | -1.124 | 0.735 |
| gi_164448722_ref_NM_001046485.2 | 540632 | TARDBP          | TAR DNA binding protein                                   | Nucleus   | transcription regulator | VH | -1.007 | 0.661 | 1.043  | 1.153 | 1.038  | 1.219 |
| gi_156120468_ref_NM_001101910.1 | 509111 | TP53BP1         | tumor protein p53 binding protein 1                       | Nucleus   | transcription regulator | H  | 1.001  | 0.560 | 1.576  | 0.500 | 1.755  | 0.358 |
| gi_119913817_ref_XM_875451.2    | 518504 | SIN3A           | SIN3 homolog A, transcription regulator (yeast)           | Nucleus   | transcription regulator | VH | 1.002  | 0.658 | 1.044  | 1.153 | 1.178  | 1.334 |
| gi_114051553_ref_NM_001046065.1 | 510921 | GTF2E2          | general transcription factor (IE, polypeptide 2, beta 34k | Nucleus   | transcription regulator | VH | 1.006  | 0.663 | -1.107 | 0.814 | -1.297 | 0.264 |
| gi_155372150_ref_NM_001101215.1 | 540757 | TFAP4           | transcription factor AP-4 (activating enhancer binding p  | Nucleus   | transcription regulator | H  | 1.007  | 0.650 | -1.461 | 0.567 | -1.291 | 0.207 |
| gi_119906615_ref_XM_617828.3    | 537652 | TRPS1           | trichorhinophalangeal syndrome 1                          | Nucleus   | transcription regulator | H  | 1.008  | 0.635 | 1.513  | 0.643 | 1.674  | 0.495 |
| gi_119901460_ref_XM_618496.3    | 538296 | BACH2 (includes | BTB and CNC homology 1, basic leucine zipper transc       | Nucleus   | transcription regulator | H  | 1.009  | 0.529 | 1.411  | 0.759 | 2.688  | 0.012 |
| gi_158508565_ref_NM_001110004.1 | 511826 | HUWE1           | HECT, UBA and WWV domain containing 1                     | Nucleus   | transcription regulator | VH | 1.009  | 0.616 | -1.003 | 1.021 | 1.243  | 1.341 |
| gi_115496707_ref_NM_001076363.1 | 615199 | UBA52           | ubiquitin A-52 residue ribosomal protein fusion product   | Cytoplasm | transcription regulator | VH | 1.010  | 0.605 | -1.035 | 0.966 | 1.015  | 1.157 |
| gi_114050926_ref_NM_001046126.1 | 512648 | ELL3            | elongation factor RNA polymerase II-like 3                | Nucleus   | transcription regulator | H  | 1.011  | 0.595 | 1.113  | 1.219 | 1.462  | 0.939 |
| gi_114052003_ref_NM_001046389.1 | 534894 | PQBP1           | polyglutamine binding protein 1                           | Nucleus   | transcription regulator | H  | 1.011  | 0.612 | -1.106 | 0.816 | 1.000  | 1.120 |
| gi_119919219_ref_XM_001256021.1 | 789199 | NFRKB           | nuclear factor related to kappaB binding protein          | Nucleus   | transcription regulator | H  | 1.013  | 0.616 | -1.654 | 0.012 | -1.155 | 0.630 |
| gi_119900354_ref_XM_618263.3    | 538070 | RFX3            | regulatory factor X, 3 (influences HLA class II expressio | Nucleus   | transcription regulator | H  | 1.014  | 0.583 | 1.361  | 1.029 | 1.040  | 1.210 |
| gi_62460491_ref_NM_001014901.1  | 511512 | RBM14           | RNA binding motif protein 14                              | Nucleus   | transcription regulator | VH | 1.014  | 0.603 | -1.145 | 0.649 | -1.071 | 0.904 |
| gi_118151327_ref_NM_001078131.1 | 768316 | NRBF2           | nuclear receptor binding factor 2                         | Nucleus   | transcription regulator | H  | 1.019  | 0.589 | -1.097 | 0.774 | -1.429 | 0.082 |
| gi_77735636_ref_NM_001034342.1  | 509107 | ATF4            | activating transcription factor 4 (tax-responsive enhanc  | Nucleus   | transcription regulator | VH | 1.019  | 0.572 | -1.307 | 0.203 | -1.117 | 0.775 |
| gi_116004076_ref_NM_001076927.1 | 540802 | ASB3            | ankyrin repeat and SOCS box-containing 3                  | Nucleus   | transcription regulator | VH | 1.020  | 0.536 | 1.392  | 0.989 | 1.157  | 1.326 |
| gi_114052532_ref_NM_001045899.1 | 504820 | BZLF1           | basic leucine zipper nuclear factor 1                     | Cytoplasm | transcription regulator | VH | 1.023  | 0.597 | -1.050 | 0.983 | -1.099 | 0.844 |
| gi_77735898_ref_NM_001034474.1  | 514852 | TAX1BP3         | Tax1 (human T-cell leukemia virus type I) binding prote   | Nucleus   | transcription regulator | H  | 1.025  | 0.514 | 1.373  | 0.953 | 1.532  | 0.750 |
| gi_114051260_ref_NM_001046617.1 | 618296 | POLR3K          | polymerase (RNA) III (DNA directed) polypeptide K, 12     | Nucleus   | transcription regulator | H  | 1.027  | 0.551 | -1.520 | 0.028 | -1.593 | 0.018 |
| gi_119895680_ref_XM_869095.2    | 540964 | TCERG1          | transcription elongation regulator 1                      | Nucleus   | transcription regulator | VH | 1.027  | 0.559 | -1.104 | 0.780 | -1.106 | 0.813 |
| gi_155372072_ref_NM_001101173.1 | 538086 | CAND1           | cullin-associated and neddylation-dissociated 1           | Cytoplasm | transcription regulator | VH | 1.028  | 0.518 | 1.047  | 1.143 | -1.269 | 0.304 |
| gi_119894811_ref_NM_881853.2    | 532791 | KEAP1           | kelch-like ECH-associated protein 1                       | Cytoplasm | transcription regulator | VH | 1.028  | 0.573 | -1.685 | 0.006 | -1.150 | 0.687 |
| gi_119920299_ref_XM_001254442.1 | 786886 | ELK1            | ELK1, member of ETS oncogene family                       | Nucleus   | transcription regulator | H  | 1.029  | 0.539 | -1.030 | 1.012 | 1.119  | 1.314 |
| gi_82697312_ref_NM_001037444.1  | 404126 | HDAC1           | histone deacetylase 1                                     | Nucleus   | transcription regulator | VH | 1.029  | 0.535 | 1.142  | 1.239 | 1.166  | 1.331 |
| gi_119911640_ref_XM_583607.3    | 507057 | PHF12           | PHD finger protein 12                                     | Nucleus   | transcription regulator | VH | 1.029  | 0.518 | -1.185 | 0.522 | 1.110  | 1.280 |
| gi_119912534_ref_XM_001256027.1 | 789613 | SMARCD2         | SWI/SNF related, matrix associated, actin dependent n     | Nucleus   | transcription regulator | VH | 1.030  | 0.565 | 1.001  | 1.067 | -1.083 | 0.872 |
| gi_66792821_ref_NM_001024517.1  | 511446 | CXXC1           | CXXC finger 1 (PHD domain)                                | Nucleus   | transcription regulator | VH | 1.031  | 0.515 | -1.020 | 0.995 | 1.154  | 1.326 |
| gi_119923597_ref_XM_001250681.1 | 784388 | RPL7            | ribosomal protein L7                                      | Cytoplasm | transcription regulator | VH | 1.035  | 0.526 | -1.033 | 1.013 | 1.091  | 1.299 |
| gi_87196500_ref_NM_174049.2     | 281141 | ENO1            | enolase 1, (alpha)                                        | Cytoplasm | transcription regulator | VH | 1.036  | 0.552 | -1.084 | 0.883 | -1.094 | 0.882 |
| gi_119893132_ref_XM_001249704.1 | 513643 | FOXM1           | forkhead box M1                                           | Nucleus   | transcription regulator | VH | 1.037  | 0.543 | -1.105 | 0.723 | 1.055  | 1.225 |
| gi_77735836_ref_NM_001034441.1  | 513315 | PSMD9           | proteasome (prosome, macropain) 26S subunit, non-A'       | Cytoplasm | transcription regulator | VH | 1.038  | 0.514 | -1.146 | 0.654 | -1.151 | 0.637 |
| gi_156121000_ref_NM_001102177.1 | 534669 | GTF2I           | general transcription factor Iii                          | Nucleus   | transcription regulator | VH | 1.044  | 0.518 | 1.458  | 0.810 | 1.449  | 0.952 |
| gi_115495344_ref_NM_001075799.1 | 520111 | TRIM27          | tripartite motif-containing 27                            | Nucleus   | transcription regulator | VH | 1.051  | 0.493 | -1.058 | 0.964 | -1.047 | 1.023 |
| gi_88319934_ref_NM_174815.2     | 287023 | YBX1            | Y box binding protein 1                                   | Nucleus   | transcription regulator | VH | 1.056  | 0.468 | -1.002 | 1.079 | -1.134 | 0.733 |
| gi_136256478_ref_NM_001077899.2 | 510807 | NFE2L3          | nuclear factor (erythroid-derived 2)-like 3               | Nucleus   | transcription regulator | H  | 1.063  | 0.420 | 1.419  | 0.901 | 1.333  | 1.226 |
| gi_119889268_ref_XM_581262.3    | 505039 | GATAD2B         | GATA zinc finger domain containing 2B                     | Nucleus   | transcription regulator | VH | 1.065  | 0.438 | -1.577 | 0.018 | -1.082 | 0.882 |
| gi_119901159_ref_XM_581531.3    | 538619 | HEY2            | hairy/enhancer-of-split related with YRPW motif 2         | Nucleus   | transcription regulator | H  | 1.067  | 0.402 | 1.142  | 1.215 | -1.125 | 0.745 |
| gi_119924677_ref_XM_588862.3    | 511514 | HIRA            | HIR histone cell cycle regulation defective homolog A (i  | Nucleus   | transcription regulator | H  | 1.069  | 0.387 | -1.858 | 0.001 | -1.220 | 0.406 |
| gi_119889130_ref_XM_588564.3    | 511264 | SKP1            | S-phase kinase-associated protein 1                       | Nucleus   | transcription regulator | VH | 1.069  | 0.407 | 1.058  | 1.163 | -1.073 | 0.908 |
| gi_78369329_ref_NM_001035467.1  | 615692 | SAP18           | Sin3A-associated protein, 18kDa                           | Nucleus   | transcription regulator | VH | 1.072  | 0.418 | -1.253 | 0.354 | -1.225 | 0.449 |
| gi_156121016_ref_NM_001102185.1 | 535312 | PIAS3           | protein inhibitor of activated STAT, 3                    | Nucleus   | transcription regulator | H  | 1.074  | 0.396 | 1.112  | 1.216 | 1.411  | 1.036 |
| gi_62751724_ref_NM_001015658.1  | 534883 | VPS72           | vacuolar protein sorting 72 homolog (S. cerevisiae)       | Nucleus   | transcription regulator | VH | 1.077  | 0.395 | 1.131  | 1.243 | 1.162  | 1.330 |
| gi_119887246_ref_XM_584216.3    | 507577 | EAF1            | ELL associated factor 1                                   | Nucleus   | transcription regulator | H  | 1.078  | 0.407 | -1.728 | 0.006 | -1.358 | 0.163 |
| gi_114052838_ref_NM_001046226.1 | 516550 | FEM1A           | fem-1 homolog a (C. elegans)                              | Nucleus   | transcription regulator | H  | 1.078  | 0.394 | -1.130 | 0.703 | -1.251 | 0.350 |
| gi_119915248_ref_XM_871526.2    | 522029 | RPL7L1          | ribosomal protein L7-like 1                               | Cytoplasm | transcription regulator | VH | 1.078  | 0.392 | -1.117 | 0.761 | -1.276 | 0.311 |
| gi_84992998_ref_NM_001034310.2  | 508043 | PTTG1           | pituitary tumor-transforming 1                            | Nucleus   | transcription regulator | VH | 1.079  | 0.387 | -1.133 | 0.679 | -1.270 | 0.319 |
| gi_119919944_ref_XM_590515.3    | 512908 | HCF1            | host cell factor C1 (VP16-accessory protein)              | Nucleus   | transcription regulator | VH | 1.080  | 0.368 | -3.954 | 0.000 | 1.023  | 1.154 |
| gi_119915977_ref_XM_588519.3    | 511224 | NFATC1          | nuclear factor of activated T-cells, cytoplasmic, calcine | Nucleus   | transcription regulator | H  | 1.080  | 0.370 | 1.458  | 0.714 | 2.414  | 0.031 |
| gi_114051440_ref_NM_001046614.1 | 618141 | ZNF3            | zinc finger protein 3                                     | Nucleus   | transcription regulator | VH | 1.084  | 0.365 | 1.004  | 1.085 | 1.111  | 1.316 |
| gi_119906488_ref_XM_583747.3    | 507179 | COP5            | COP9 constitutive photomorphogenic homolog subunit        | Nucleus   | transcription regulator | VH | 1.087  | 0.364 | -1.112 | 0.752 | -1.516 | 0.460 |
| gi_78369417_ref_NM_001035417.1  | 537706 | THOC4           | THO complex 4                                             | Nucleus   | transcription regulator | VH | 1.089  | 0.348 | -1.491 | 0.036 | -1.713 | 0.007 |
| gi_77736184_ref_NM_001034619.1  | 534898 | ANKRD46         | ankyrin repeat domain 46                                  | Nucleus   | transcription regulator | H  | 1.090  | 0.354 | 1.370  | 1.020 | 1.217  | 1.343 |
| gi_115496725_ref_NM_001076029.1 | 534579 | TFDP1           | transcription factor Dp-1                                 | Nucleus   | transcription regulator | VH | 1.091  | 0.358 | -1.307 | 0.225 | -1.461 | 0.062 |
| gi_62751822_ref_NM_001015575.1  | 511571 | RNF25           | ring finger protein 25                                    | Nucleus   | transcription regulator | H  | 1.092  | 0.341 | -1.229 | 0.349 | -1.113 | 0.762 |
| gi_77735524_ref_NM_001034286.1  | 507245 | ECSIT           | ECSIT homolog (Drosophila)                                | Nucleus   | transcription regulator | H  | 1.094  | 0.355 | -1.528 | 0.025 | -1.879 | 0.002 |
| gi_115495422_ref_NM_001075146.1 | 407223 | HDAC2           | histone deacetylase 2                                     | Nucleus   | transcription regulator | VH | 1.094  | 0.360 | 1.120  | 1.237 | -1.133 | 0.730 |
| gi_75832050_ref_NM_173999.2     | 281032 | BTG1            | B-cell translocation gene 1, anti-proliferative           | Nucleus   | transcription regulator | VH | 1.096  | 0.320 | -1.595 | 0.011 | -1.649 | 0.012 |
| gi_82697392_ref_NM_001037482.1  | 540069 | CIAO1           | cytosolic iron-sulfur protein assembly 1 homolog (S. ce   | Nucleus   | transcription regulator | H  | 1.100  | 0.332 | -1.103 | 0.802 | -1.181 | 0.546 |
| gi_115497993_ref_NM_001076468.1 | 617553 | BAT4            | HLA-B associated transcription 4                          | Nucleus   | transcription regulator | VH | 1.100  | 0.342 | -1.076 | 0.888 | -1.186 | 0.532 |
| gi_115496174_ref_NM_001076523.1 | 618849 | HMG1A           | high mobility group AT-hook 1                             | Nucleus   | transcription regulator | VH | 1.102  | 0.304 | -1.148 | 0.597 | -1.291 | 0.257 |
| gi_119893304_ref_XM_583656.3    | 507102 | SREBF2          | sterol regulatory element binding transcription factor 2  | Nucleus   | transcription regulator | VH | 1.104  | 0.325 | -2.539 | 0.000 | 1.113  | 1.299 |
| gi_114052790_ref_NM_001046289.1 | 528003 | ANKRA2          | ankyrin repeat, family A (RFXANK-like), 2                 | Cytoplasm | transcription regulator | VH | 1.104  | 0.309 | 1.074  | 1.169 | -1.341 | 0.174 |
| gi_119884987_ref_XM_588490.3    | 539633 | HLTF            | helicase-like transcription factor                        | Nucleus   | transcription regulator | VH | 1.104  | 0.317 | -1.007 | 1.047 | -1.221 | 0.423 |
| gi_77736278_ref_NM_001034667.1  | 539223 | LASS2           | LAG1 homolog, ceramide synthase 2                         | Nucleus   | transcription regulator | VH | 1.104  | 0.333 | 1.027  | 1.149 | -1.039 | 1.047 |
| gi_118151295_ref_NM_001078114.1 | 768240 | HOXB4           | homeobox B4                                               | Nucleus   | transcription regulator | H  | 1.105  | 0.319 | -1.136 | 0.691 | -1.178 | 0.563 |
| gi_115496355_ref_NM_001076329.1 | 614472 | POLR2I          | polymerase (RNA) II (DNA directed) polypeptide I, 14.5    | Nucleus   | transcription regulator | H  | 1.105  | 0.310 | -1.253 | 0.314 | -1.912 | 0.002 |
| gi_114050962_ref_NM_001046481.1 | 540558 | MBD1            | methyl-CpG binding domain protein 1                       | Nucleus   | transcription regulator | H  | 1.106  | 0.320 | -1.440 | 0.064 | -1.099 | 0.775 |
| gi_77735922_ref_NM_001034486.1  | 515299 | MED4            | mediator complex subunit 4                                | Nucleus   | transcription regulator | H  | 1.107  | 0.312 | 1.006  | 1.075 | -1.200 | 0.468 |
| gi_118150887_ref_NM_001077888.1 | 509238 | TAF1C           | TATA box binding protein (TBP)-associated factor, RNA     | Nucleus   | transcription regulator | H  | 1.109  | 0.317 | -1.826 | 0.006 | -1.163 | 0.624 |
| gi_115497247_ref_NM_001076079.1 | 536696 | YAF2            | YY1 associated factor 2                                   | Nucleus   | transcription regulator | H  | 1.109  | 0.315 | -1.190 | 0.524 | -1.253 | 0.359 |

|                                 |           |                   |                                                           |           |                         |    |       |       |        |       |        |       |
|---------------------------------|-----------|-------------------|-----------------------------------------------------------|-----------|-------------------------|----|-------|-------|--------|-------|--------|-------|
| gi_119911525_ref_XM_001252957.1 | 786013    | AATF              | apoptosis antagonizing transcription factor               | Nucleus   | transcription regulator | VH | 1.110 | 0.323 | -1.153 | 0.661 | -1.451 | 0.073 |
| gi_73853780_ref_NM_001029845.2  | 516979    | IRF3              | interferon regulatory factor 3                            | Nucleus   | transcription regulator | VH | 1.110 | 0.315 | 1.086  | 1.203 | 1.213  | 1.341 |
| gi_119908788_ref_XM_6124033     | 540633    | KDM5B             | lysine (K)-specific demethylase 5B                        | Nucleus   | transcription regulator | VH | 1.110 | 0.316 | 1.165  | 1.248 | 1.227  | 1.344 |
| gi_119890708_ref_XM_581455.3    | 505204    | ANKIB1            | ankyrin repeat and IBR domain containing 1                | Nucleus   | transcription regulator | H  | 1.111 | 0.309 | 1.085  | 1.183 | 1.013  | 1.143 |
| gi_119912680_ref_XM_583104.3    | 506628    | CBX2              | chromobox homolog 2 (Pc class homolog, Drosophila)        | Nucleus   | transcription regulator | H  | 1.116 | 0.301 | -2.465 | 0.000 | -1.688 | 0.008 |
| gi_119887162_ref_XM_596225.3    | 518043    | DIP2A             | DIP2 disco-interacting protein 2 homolog A (Drosophila)   | Nucleus   | transcription regulator | H  | 1.120 | 0.291 | -1.072 | 0.804 | 1.253  | 1.342 |
| gi_119331215_ref_NM_001079788.1 | 615512    | CNCH              | cyclin H                                                  | Nucleus   | transcription regulator | H  | 1.121 | 0.279 | 1.103  | 1.203 | 1.254  | 0.326 |
| gi_77735576_ref_NM_001034312.1  | 508055    | CNOT7             | CCR4-NOT transcription complex, subunit 7                 | Nucleus   | transcription regulator | VH | 1.121 | 0.280 | 1.036  | 1.141 | -1.077 | 0.917 |
| gi_114051078_ref_NM_001046218.1 | 516010    | SMAD2             | SMAD family member 2                                      | Nucleus   | transcription regulator | VH | 1.125 | 0.278 | 1.115  | 1.235 | 1.092  | 1.272 |
| gi_119919717_ref_XM_580654.3    | 504514    | ELF4              | E74-like factor 4 (ets domain transcription factor)       | Nucleus   | transcription regulator | VH | 1.127 | 0.272 | -1.113 | 0.628 | 1.103  | 1.298 |
| gi_115495532_ref_NM_001075161.1 | 504400    | RBCK1             | RanBP-type and C3HC4-type zinc finger containing 1        | Cytoplasm | transcription regulator | H  | 1.128 | 0.275 | -1.003 | 1.052 | 1.493  | 0.857 |
| gi_119906545_ref_XM_584905.3    | 508162    | NCOA2             | nuclear receptor coactivator 2                            | Nucleus   | transcription regulator | VH | 1.128 | 0.274 | -1.226 | 0.365 | 1.197  | 1.338 |
| gi_115497589_ref_NM_001076137.1 | 538961    | ANKRD54           | ankyrin repeat domain 54                                  | Nucleus   | transcription regulator | H  | 1.130 | 0.278 | -1.138 | 0.703 | -1.202 | 0.511 |
| gi_156523141_ref_NM_001102515.1 | 534582    | NFE2L1            | nuclear factor (erythroid-derived 2)-like 1               | Nucleus   | transcription regulator | VH | 1.130 | 0.258 | -1.140 | 0.603 | 1.092  | 1.269 |
| gi_157427957_ref_NM_001105416.1 | 537503    | SMARCA5           | SWI/SNF related, matrix associated, actin dependent n     | Nucleus   | transcription regulator | VH | 1.130 | 0.265 | -1.140 | 0.674 | -1.138 | 0.695 |
| gi_47564069_ref_NM_001001162.1  | 407240    | USF2              | upstream transcription factor 2, c-fos interacting        | Nucleus   | transcription regulator | VH | 1.131 | 0.278 | 1.131  | 1.243 | 1.078  | 1.287 |
| gi_119917224_ref_XM_583735.3    | 507169    | TRRAP             | transformation/transcription domain-associated protein    | Nucleus   | transcription regulator | H  | 1.135 | 0.261 | -1.879 | 0.004 | 1.091  | 1.287 |
| gi_119893060_ref_XM_612715.3    | 540703    | FOXJ2             | forkhead box J2                                           | Nucleus   | transcription regulator | VH | 1.136 | 0.251 | 1.224  | 1.254 | 1.204  | 1.343 |
| gi_119915805_ref_XM_614932.3    | 541184    | E2F3              | E2F transcription factor 3                                | Nucleus   | transcription regulator | H  | 1.147 | 0.155 | -1.192 | 0.276 | -1.504 | 0.041 |
| gi_119895278_ref_XM_604851.2    | 526480    | ZNF496            | zinc finger protein 496                                   | Nucleus   | transcription regulator | H  | 1.147 | 0.235 | -1.322 | 0.159 | -1.150 | 0.641 |
| gi_114051222_ref_NM_001046198.1 | 515363    | PHB2              | phosphatidylethanolamine binding protein 2                | Cytoplasm | transcription regulator | VH | 1.149 | 0.233 | -1.404 | 0.087 | -1.303 | 0.252 |
| gi_119919137_ref_XM_879600.2    | 531109    | TAF6L             | TAF6-like RNA polymerase II, 300/CBP-associated fa        | Nucleus   | transcription regulator | H  | 1.152 | 0.227 | -1.111 | 0.732 | -1.041 | 0.997 |
| gi_77736342_ref_NM_001034699.1  | 540272    | PA2G4             | proliferation-associated 2G4, 38kDa                       | Nucleus   | transcription regulator | VH | 1.153 | 0.226 | -1.099 | 0.843 | -1.250 | 0.387 |
| gi_84000346_ref_NM_001038187.1  | 539760    | ILF2 (includes EG | interleukin enhancer binding factor 2, 45kDa              | Nucleus   | transcription regulator | VH | 1.156 | 0.211 | -1.242 | 0.353 | -1.372 | 0.147 |
| gi_84370076_ref_NM_001038526.1  | 511048    | RUVBL2            | RuvB-like 2 (E. coli)                                     | Nucleus   | transcription regulator | VH | 1.156 | 0.221 | -1.394 | 0.102 | -1.476 | 0.057 |
| gi_148224063_ref_NM_001098081.1 | 534353    | YY1               | YY1 transcription factor                                  | Nucleus   | transcription regulator | H  | 1.161 | 0.210 | -1.243 | 0.370 | 1.050  | 1.231 |
| gi_119895592_ref_XM_868478.2    | 404125    | HDAC3             | histone deacetylase 3                                     | Nucleus   | transcription regulator | VH | 1.166 | 0.206 | -1.064 | 0.913 | -1.158 | 0.625 |
| gi_119921496_ref_XM_587845.3    | 510673    | PTTG1             | pituitary tumor-transforming 1                            | Nucleus   | transcription regulator | VH | 1.168 | 0.194 | -1.207 | 0.448 | -1.388 | 0.121 |
| gi_114051408_ref_NM_001046142.1 | 513231    | GTF2B             | general transcription factor IIB                          | Nucleus   | transcription regulator | VH | 1.171 | 0.193 | 1.066  | 1.170 | -1.002 | 1.096 |
| gi_156120816_ref_NM_001102085.1 | 524920    | MYEF2             | myelin expression factor 2                                | Nucleus   | transcription regulator | VH | 1.183 | 0.175 | -1.586 | 0.014 | -1.436 | 0.084 |
| gi_115496233_ref_NM_001075742.1 | 516578    | TBP               | TATA box binding protein                                  | Nucleus   | transcription regulator | VH | 1.186 | 0.173 | -1.040 | 1.001 | -1.207 | 0.486 |
| gi_119894521_ref_XM_866768.2    | 510465    | CRTC1             | CREB regulated transcription coactivator 1                | Nucleus   | transcription regulator | H  | 1.187 | 0.180 | 1.113  | 1.217 | 1.451  | 0.938 |
| gi_119904185_ref_XM_586742.3    | 509719    | ASB6              | ankyrin repeat and SOCS box-containing 6                  | Nucleus   | transcription regulator | H  | 1.188 | 0.172 | -1.884 | 0.000 | -2.102 | 0.000 |
| gi_77735588_ref_NM_001034318.1  | 508312    | SFRS2             | splicing factor, arginine/serine-rich 2                   | Nucleus   | transcription regulator | VH | 1.188 | 0.156 | -1.271 | 0.268 | -1.247 | 0.364 |
| gi_123959763_ref_NM_001080735.1 | 531369    | TTF2              | transcription termination factor, RNA polymerase II       | Nucleus   | transcription regulator | VH | 1.189 | 0.167 | 1.138  | 1.247 | -1.092 | 0.883 |
| gi_126723003_ref_NM_001082454.1 | 540641    | CCRN4L            | CCR4 carbon catabolite repression 4-like (S. cerevisiae)  | Nucleus   | transcription regulator | H  | 1.190 | 0.170 | -1.669 | 0.006 | -1.847 | 0.002 |
| gi_119894329_ref_XM_866758.2    | 615059    | HTT               | huntingtin                                                | Cytoplasm | transcription regulator | H  | 1.191 | 0.168 | -1.673 | 0.009 | -1.157 | 0.608 |
| gi_157074101_ref_NM_001103293.1 | 540294    | MED20             | mediator complex subunit 20                               | Nucleus   | transcription regulator | H  | 1.191 | 0.167 | -1.142 | 0.674 | -1.192 | 0.534 |
| gi_119889053_ref_XM_863928.2    | 506759    | IFI16             | interferon, gamma-inducible protein 16                    | Nucleus   | transcription regulator | VH | 1.191 | 0.164 | 1.795  | 0.194 | 2.037  | 0.129 |
| gi_114052195_ref_NM_001046364.1 | 533977    | BUD31 (includes   | BUD31 homolog (S. cerevisiae)                             | Nucleus   | transcription regulator | VH | 1.197 | 0.160 | -1.169 | 0.589 | -1.371 | 0.145 |
| gi_114052215_ref_NM_001046362.1 | 533951    | PLRG1             | pleiotropic regulator 1 (PRL1 homolog, Arabidopsis)       | Nucleus   | transcription regulator | VH | 1.201 | 0.156 | -1.079 | 0.897 | -1.243 | 0.381 |
| gi_119906375_ref_XM_592984.3    | 515040    | ZHX2              | zinc fingers and homeoboxes 2                             | Nucleus   | transcription regulator | H  | 1.204 | 0.145 | 1.012  | 0.972 | 1.363  | 1.114 |
| gi_115497369_ref_NM_001075155.1 | 504336    | DAXX              | death-domain associated protein                           | Nucleus   | transcription regulator | VH | 1.210 | 0.145 | -1.216 | 0.408 | -1.341 | 0.189 |
| gi_118151325_ref_NM_001078128.1 | 768313    | SOX4              | SRY (sex determining region Y)-box 4                      | Nucleus   | transcription regulator | VH | 1.214 | 0.145 | -2.428 | 0.000 | -1.245 | 0.345 |
| gi_115496557_ref_NM_001075712.1 | 515389    | MTA2              | metastasis associated 1 family, member 2                  | Nucleus   | transcription regulator | VH | 1.218 | 0.132 | -1.116 | 0.743 | -1.191 | 0.528 |
| gi_155371882_ref_NM_001101076.1 | 511475    | RUVBL1            | RuvB-like 1 (E. coli)                                     | Nucleus   | transcription regulator | VH | 1.218 | 0.131 | -1.468 | 0.050 | -1.936 | 0.001 |
| gi_62460609_ref_NM_001014956.1  | 539584    | NFYA              | nuclear transcription factor Y, alpha                     | Nucleus   | transcription regulator | H  | 1.220 | 0.136 | -1.119 | 0.753 | -1.064 | 0.932 |
| gi_114052566_ref_NM_001045897.1 | 504755    | NAB2              | NGFI-A binding protein 2 (EGR1 binding protein 2)         | Nucleus   | transcription regulator | H  | 1.224 | 0.131 | -1.953 | 0.000 | -1.162 | 0.583 |
| gi_147904941_ref_NM_001101678.2 | 497024    | NFE2L2            | nuclear factor (erythroid-derived 2)-like 2               | Nucleus   | transcription regulator | H  | 1.227 | 0.119 | 1.329  | 1.158 | 1.853  | 0.261 |
| gi_157074203_ref_NM_001103347.1 | 100125315 | TEAD2             | TEA domain family member 2                                | Nucleus   | transcription regulator | H  | 1.230 | 0.123 | -1.044 | 0.956 | 1.193  | 1.341 |
| gi_116003842_ref_NM_001076809.1 | 506235    | HSF1              | heat shock transcription factor 1                         | Nucleus   | transcription regulator | VH | 1.231 | 0.119 | -1.555 | 0.021 | -1.330 | 0.187 |
| gi_62752036_ref_NM_001015525.1  | 505638    | TAF6              | TAF6 RNA polymerase II, TATA box binding protein (TE      | Nucleus   | transcription regulator | VH | 1.232 | 0.119 | -1.088 | 0.856 | 1.052  | 1.250 |
| gi_157074103_ref_NM_001103294.1 | 540525    | GTF2E1            | general transcription factor IIE, polypeptide 1, alpha 56 | Nucleus   | transcription regulator | H  | 1.233 | 0.117 | -1.102 | 0.835 | -1.657 | 0.011 |
| gi_118601827_ref_NM_001079618.1 | 613879    | MED30             | mediator complex subunit 30                               | Nucleus   | transcription regulator | H  | 1.234 | 0.110 | -1.570 | 0.015 | -1.943 | 0.001 |
| gi_119912413_ref_XM_601299.3    | 497012    | UBTF              | upstream binding transcription factor, RNA polymerase     | Nucleus   | transcription regulator | VH | 1.234 | 0.110 | 1.152  | 1.246 | 1.213  | 1.343 |
| gi_77735432_ref_NM_001034237.1  | 505293    | MED6              | mediator complex subunit 6                                | Nucleus   | transcription regulator | H  | 1.237 | 0.110 | -1.048 | 0.961 | -1.207 | 0.490 |
| gi_66792729_ref_NM_001024506.1  | 509855    | IRF9              | interferon regulatory factor 9                            | Nucleus   | transcription regulator | H  | 1.238 | 0.108 | 1.527  | 0.589 | 2.828  | 0.008 |
| gi_126723253_ref_NM_001080242.2 | 508233    | RELA              | v-rel reticuloendotheliosis viral oncogene homolog A (a   | Nucleus   | transcription regulator | H  | 1.242 | 0.109 | -1.327 | 0.188 | -1.235 | 0.371 |
| gi_134085614_ref_NM_001083439.1 | 519808    | SUPT5H            | suppressor of Ty 5 homolog (S. cerevisiae)                | Nucleus   | transcription regulator | VH | 1.246 | 0.097 | -1.279 | 0.289 | -1.186 | 0.547 |
| gi_119920138_ref_XM_001249858.1 | 767875    | HMG5              | high-mobility group nucleosome binding domain 5           | Nucleus   | transcription regulator | H  | 1.256 | 0.092 | -1.056 | 0.890 | -1.528 | 0.034 |
| gi_115497273_ref_NM_001075868.1 | 525329    | NCOA4             | nuclear receptor coactivator 4                            | Nucleus   | transcription regulator | VH | 1.266 | 0.082 | 1.066  | 1.178 | -1.093 | 0.848 |
| gi_114052005_ref_NM_001046150.1 | 513510    | GTF2H1            | general transcription factor IIH, polypeptide 1, 62kDa    | Nucleus   | transcription regulator | VH | 1.267 | 0.083 | -1.095 | 0.820 | -1.225 | 0.409 |
| gi_118601765_ref_NM_001079589.1 | 511896    | GTF2H3            | general transcription factor IIH, polypeptide 3, 34kDa    | Nucleus   | transcription regulator | VH | 1.267 | 0.083 | -1.182 | 0.538 | -1.372 | 0.143 |
| gi_119914213_ref_XM_870485.2    | 618161    | BRF1              | BRF1 homolog, subunit of RNA polymerase III transcripti   | Nucleus   | transcription regulator | H  | 1.276 | 0.082 | -1.480 | 0.045 | 1.042  | 1.181 |
| gi_110626168_ref_NM_176641.1    | 338045    | SQSTM1            | sequestosome 1                                            | Cytoplasm | transcription regulator | VH | 1.277 | 0.079 | 1.197  | 1.258 | 1.275  | 1.326 |
| gi_139947539_ref_NM_001083683.1 | 513928    | ATF6B             | activating transcription factor 6 beta                    | Cytoplasm | transcription regulator | H  | 1.287 | 0.075 | 1.058  | 1.174 | 1.029  | 1.198 |
| gi_115495660_ref_NM_001076161.1 | 539431    | MEN1              | multiple endocrine neoplasia 1                            | Nucleus   | transcription regulator | VH | 1.293 | 0.069 | -1.056 | 0.944 | -1.053 | 0.994 |
| gi_139949051_ref_NM_001083684.1 | 514216    | TCF19             | transcription factor 19                                   | Nucleus   | transcription regulator | VH | 1.301 | 0.064 | -1.260 | 0.318 | -1.505 | 0.044 |
| gi_119918919_ref_XM_864789.2    | 514176    | ZDHHC13           | zinc finger, DHHC-type containing 13                      | Nucleus   | transcription regulator | H  | 1.305 | 0.063 | 1.609  | 0.449 | 1.279  | 1.333 |
| gi_124430747_ref_NM_001075811.2 | 520800    | TFE3              | transcription factor binding to IGHM enhancer 3           | Nucleus   | transcription regulator | VH | 1.306 | 0.061 | -1.100 | 0.843 | -1.113 | 0.802 |
| gi_119917078_ref_XM_583422.3    | 506908    | CLIP2             | CAP-GLY domain containing linker protein 2                | Cytoplasm | transcription regulator | H  | 1.307 | 0.062 | -1.048 | 0.926 | 1.079  | 1.281 |
| gi_162287360_ref_NM_001012671.2 | 508541    | STAT3             | signal transducer and activator of transcription 3 (acute | Nucleus   | transcription regulator | VH | 1.311 | 0.059 | -1.059 | 0.946 | 1.558  | 0.697 |
| gi_28372480_ref_NM_175712.1     | 281730    | CTBP2             | C-terminal binding protein 2                              | Nucleus   | transcription regulator | H  | 1.313 | 0.058 | 1.005  | 1.092 | -1.067 | 0.935 |
| gi_93205067_ref_NM_001001161.2  | 407239    | USF1              | upstream transcription factor 1                           | Nucleus   | transcription regulator | VH | 1.314 | 0.060 | -1.874 | 0.001 | 1.204  | 1.340 |



|                                   |           |                     |                                                                            |                 |                         |    |       |       |        |       |        |       |
|-----------------------------------|-----------|---------------------|----------------------------------------------------------------------------|-----------------|-------------------------|----|-------|-------|--------|-------|--------|-------|
| gi_119915224_ref_XM_001250850.1   | 517805    | FOXP4               | forkhead box P4                                                            | Nucleus         | transcription regulator | H  | 1.318 | 0.057 | -1.419 | 0.083 | -1.010 | 1.077 |
| gi_88319935_ref_NM_174617.3       | 282376    | STAT5B              | signal transducer and activator of transcription 5B                        | Nucleus         | transcription regulator | H  | 1.318 | 0.054 | 1.062  | 1.166 | 1.292  | 1.301 |
| gi_119910262_ref_XM_612960.3      | 533526    | CNNE1               | cyclin E1                                                                  | Nucleus         | transcription regulator | H  | 1.319 | 0.053 | -1.166 | 0.535 | -1.875 | 0.002 |
| gi_114051811_ref_NM_00104647.1    | 536421    | CYLD                | cylindromatosis (turban tumor syndrome)                                    | Nucleus         | transcription regulator | H  | 1.322 | 0.054 | 1.302  | 1.193 | 1.326  | 1.233 |
| gi_115497533_ref_NM_001075873.1   | 525428    | E2F4                | E2F transcription factor 4, p107/p130-binding                              | Nucleus         | transcription regulator | VH | 1.333 | 0.049 | -1.382 | 0.107 | -1.447 | 0.069 |
| gi_119910692_ref_XM_001256663.1   | 790100    | IRF2BP1             | interferon regulatory factor 2 binding protein 1                           | Nucleus         | transcription regulator | H  | 1.334 | 0.053 | -2.899 | 0.000 | -1.059 | 0.926 |
| gi_6852489_gb_AW353499.1_AW353499 | 353105    | STAT6               | signal transducer and activator of transcription 6, interleukin 6          | Nucleus         | transcription regulator | VH | 1.335 | 0.049 | -1.169 | 0.544 | 1.202  | 1.341 |
| gi_156121100_ref_NM_001102227.1   | 539120    | VEZF1               | vascular endothelial zinc finger 1                                         | Nucleus         | transcription regulator | H  | 1.339 | 0.045 | 1.126  | 1.237 | 1.181  | 1.339 |
| gi_119907798_ref_XM_585224.3      | 508448    | PSMC3               | proteasome (prosome, macropain) 26S subunit, ATPase                        | Nucleus         | transcription regulator | VH | 1.339 | 0.048 | -1.324 | 0.194 | -1.507 | 0.043 |
| gi_119907105_ref_XM_585092.3      | 508330    | MLL                 | myeloid/lymphoid or mixed-lineage leukemia (trithorax)                     | Nucleus         | transcription regulator | H  | 1.343 | 0.044 | -1.283 | 0.072 | 1.289  | 1.321 |
| gi_157280010_ref_NM_001105051.1   | 100125778 | RING1               | ring finger protein 1                                                      | Nucleus         | transcription regulator | VH | 1.345 | 0.044 | -1.632 | 0.010 | -1.266 | 0.339 |
| gi_119915255_ref_XM_612306.3      | 533039    | SRF                 | serum response factor (c-fos serum response element)                       | Nucleus         | transcription regulator | VH | 1.346 | 0.043 | -1.461 | 0.054 | -1.263 | 0.334 |
| gi_156120882_ref_NM_001102118.1   | 528433    | DDX20               | DEAD (Asp-Glu-Ala-Asp) box polypeptide 20                                  | Nucleus         | transcription regulator | VH | 1.349 | 0.041 | -1.069 | 0.905 | -1.154 | 0.659 |
| gi_119907824_ref_XM_583654.3      | 507100    | SPH1                | spleen focus forming virus (SFFV) proviral integration control element     | Nucleus         | transcription regulator | VH | 1.349 | 0.042 | 1.111  | 1.209 | 1.256  | 1.335 |
| gi_77736090_ref_NM_001034572.1    | 530409    | PHB (includes EGR3) | prohibitin                                                                 | Nucleus         | transcription regulator | VH | 1.350 | 0.041 | -1.498 | 0.030 | -1.757 | 0.005 |
| gi_134085849_ref_NM_001083382.1   | 507180    | PHF5A               | PHD finger protein 5A                                                      | Nucleus         | transcription regulator | VH | 1.352 | 0.041 | -1.605 | 0.012 | -1.945 | 0.001 |
| gi_119919541_ref_XM_586187.3      | 509260    | DAF1                | deformed epidermal autoregulatory factor 1 (Drosophila)                    | Nucleus         | transcription regulator | H  | 1.355 | 0.043 | -1.206 | 0.444 | -1.103 | 0.732 |
| gi_62751635_ref_NM_001015527.1    | 505702    | GTF2F1              | general transcription factor IIF, polypeptide 1, 74kDa                     | Nucleus         | transcription regulator | VH | 1.355 | 0.040 | -1.424 | 0.071 | -1.553 | 0.025 |
| gi_115497343_ref_NM_001075627.1   | 513544    | SAP30BP             | SAP30 binding protein                                                      | Nucleus         | transcription regulator | VH | 1.360 | 0.039 | -1.219 | 0.296 | -1.442 | 0.072 |
| gi_154707855_ref_NM_001099177.1   | 618386    | TCF25               | transcription factor 25 (basic helix-loop-helix)                           | Nucleus         | transcription regulator | VH | 1.365 | 0.037 | -1.075 | 0.865 | 1.026  | 1.193 |
| gi_164448549_ref_NM_001024497.2   | 507867    | ANKZF1              | ankyrin repeat and zinc finger domain containing 1                         | Nucleus         | transcription regulator | VH | 1.371 | 0.041 | -1.629 | 0.010 | -1.725 | 0.006 |
| gi_119904250_ref_XM_001251674.1   | 783869    | GTF3C5              | general transcription factor IIIC, polypeptide 5, 63kDa                    | Nucleus         | transcription regulator | VH | 1.372 | 0.036 | -1.400 | 0.097 | -1.390 | 0.124 |
| gi_119879733_ref_XM_614853.3      | 541166    | ETV5                | ets variant 5                                                              | Nucleus         | transcription regulator | VH | 1.388 | 0.032 | -1.266 | 0.303 | -1.796 | 0.004 |
| gi_119884881_ref_XM_606317.3      | 527910    | SKIL                | SKI-like oncogene                                                          | Nucleus         | transcription regulator | H  | 1.394 | 0.028 | 2.352  | 0.012 | 2.431  | 0.029 |
| gi_149642704_ref_NM_001099175.1   | 618232    | MED15               | mediator complex subunit 15                                                | Nucleus         | transcription regulator | H  | 1.398 | 0.028 | -1.943 | 0.000 | -1.368 | 0.143 |
| gi_77736577_ref_NM_001034800.1    | 617277    | TCEB2               | transcription elongation factor B (SIII), polypeptide 2 (1)                | Nucleus         | transcription regulator | VH | 1.401 | 0.031 | -1.468 | 0.048 | -1.421 | 0.090 |
| gi_119905767_ref_XM_606138.3      | 527740    | CBFA2T2             | core-binding factor, runt domain, alpha subunit 2; transcription factor 21 | Nucleus         | transcription regulator | H  | 1.402 | 0.032 | 1.114  | 1.186 | 1.269  | 1.330 |
| gi_62751533_ref_NM_001015625.1    | 520639    | CLPB                | ClpB caseinolytic peptidase B homolog (E. coli)                            | Nucleus         | transcription regulator | H  | 1.405 | 0.030 | -1.429 | 0.064 | -1.847 | 0.003 |
| gi_11991147_ref_XM_609413.3       | 530932    | TCEB2               | transcription elongation factor B (SIII), polypeptide 2 (1)                | Nucleus         | transcription regulator | VH | 1.405 | 0.030 | -1.507 | 0.030 | -1.457 | 0.066 |
| gi_114052113_ref_NM_001046375.1   | 534228    | PRPF6               | PRP6 pre-mRNA processing factor 6 homolog (S. cerevisiae)                  | Nucleus         | transcription regulator | VH | 1.415 | 0.026 | -1.062 | 0.902 | -1.072 | 0.915 |
| gi_119915359_ref_XM_583214.3      | 506727    | NFKBIE              | nuclear factor of kappa light polypeptide gene enhancer 1, epsilon         | Nucleus         | transcription regulator | H  | 1.419 | 0.028 | -1.186 | 0.464 | 1.002  | 1.105 |
| gi_119916184_ref_XM_596212.3      | 518030    | TAF4B               | TAF4b RNA polymerase II, TATA box binding protein (TBP)                    | Nucleus         | transcription regulator | H  | 1.448 | 0.021 | -1.169 | 0.541 | -1.591 | 0.019 |
| gi_165905558_ref_NM_001046125.2   | 512562    | MAGED1              | melanoma antigen family D, 1                                               | Plasma Membrane | transcription regulator | VH | 1.452 | 0.018 | 1.158  | 1.252 | 1.181  | 1.341 |
| gi_115496443_ref_NM_001075346.1   | 508127    | DMAP1               | DNA methyltransferase 1 associated protein 1                               | Nucleus         | transcription regulator | VH | 1.458 | 0.018 | -1.353 | 0.145 | -1.244 | 0.351 |
| gi_119915909_ref_XM_865312.2      | 506141    | IRF4                | interferon regulatory factor 4                                             | Nucleus         | transcription regulator | H  | 1.470 | 0.018 | -1.848 | 0.001 | -2.502 | 0.000 |
| gi_119911595_ref_XM_868906.2      | 538671    | SUPT6H              | suppressor of Ty 6 homolog (S. cerevisiae)                                 | Nucleus         | transcription regulator | VH | 1.504 | 0.013 | -1.338 | 0.165 | -1.077 | 0.908 |
| gi_164420754_ref_NM_001076875.2   | 525256    | PREB                | prolactin regulatory element binding protein 2                             | Nucleus         | transcription regulator | H  | 1.507 | 0.013 | -1.706 | 0.005 | -1.772 | 0.004 |
| gi_119911729_ref_XM_870907.2      | 618576    | MNT                 | MAX binding protein                                                        | Nucleus         | transcription regulator | H  | 1.509 | 0.013 | -2.683 | 0.000 | 1.009  | 1.092 |
| gi_115497653_ref_NM_001075240.1   | 506097    | NFIL3               | nuclear factor, interleukin 3 regulated                                    | Nucleus         | transcription regulator | H  | 1.511 | 0.011 | 1.026  | 1.137 | -1.191 | 0.536 |
| gi_84370155_ref_NM_001038565.1    | 539291    | MYCBP               | c-myc binding protein                                                      | Nucleus         | transcription regulator | H  | 1.513 | 0.012 | -1.597 | 0.013 | -2.021 | 0.000 |
| gi_125630716_ref_NM_001081542.1   | 541125    | ELK3                | ELK3, ETS-domain protein (SRF accessory protein 2)                         | Nucleus         | transcription regulator | VH | 1.517 | 0.011 | -1.007 | 1.057 | -1.079 | 0.887 |
| gi_47564055_ref_NM_001001150.1    | 407219    | MITF                | microphthalmia-associated transcription factor                             | Nucleus         | transcription regulator | H  | 1.532 | 0.010 | 1.643  | 0.373 | 1.919  | 0.196 |
| gi_114052756_ref_NM_001045875.1   | 407125    | EGR1                | early growth response 1                                                    | Nucleus         | transcription regulator | H  | 1.533 | 0.010 | -1.221 | 1.400 | 1.800  | 0.314 |
| gi_84000132_ref_NM_001038072.1    | 510666    | BM11                | BM11 polycarb ring finger oncogene                                         | Nucleus         | transcription regulator | VH | 1.542 | 0.009 | 1.093  | 1.217 | -1.036 | 1.038 |
| gi_119894776_ref_XR_028159.1      | 784795    | CARM1               | coactivator-associated arginine methyltransferase 1                        | Nucleus         | transcription regulator | VH | 1.543 | 0.010 | -1.542 | 0.024 | -1.214 | 0.456 |
| gi_115497489_ref_NM_001075872.1   | 525408    | NFKBIB              | nuclear factor of kappa light polypeptide gene enhancer 1, beta 1          | Nucleus         | transcription regulator | H  | 1.545 | 0.008 | -1.911 | 0.000 | -2.075 | 0.000 |
| gi_119894953_ref_XM_001255535.1   | 788491    | ZBTB7A              | zinc finger and BTB domain containing 7A                                   | Nucleus         | transcription regulator | H  | 1.550 | 0.010 | -2.271 | 0.000 | -1.444 | 0.073 |
| gi_78042545_ref_NM_001035098.1    | 511280    | NMI                 | N-myc (and STAT) interactor                                                | Cytoplasm       | transcription regulator | H  | 1.564 | 0.007 | 1.158  | 1.234 | -1.206 | 0.457 |
| gi_115495776_ref_NM_001075448.1   | 510420    | MYBL2               | v-myb myeloblastosis viral oncogene homolog (avian)                        | Nucleus         | transcription regulator | VH | 1.567 | 0.008 | -1.877 | 0.000 | -2.078 | 0.000 |
| gi_119901277_ref_XM_615634.3      | 535530    | FOXO3               | forkhead box O3                                                            | Nucleus         | transcription regulator | VH | 1.571 | 0.007 | -1.003 | 0.925 | 1.823  | 0.287 |
| gi_78369189_ref_NM_001035349.1    | 524118    | ARID5A              | AT rich interactive domain 5A (MRF1-like)                                  | Nucleus         | transcription regulator | H  | 1.592 | 0.006 | -2.243 | 0.000 | -1.682 | 0.008 |
| gi_115497487_ref_NM_001076141.1   | 539003    | CTNNB1              | catenin (cadherin-associated protein), beta 1, 88kDa                       | Nucleus         | transcription regulator | VH | 1.680 | 0.004 | 1.025  | 1.137 | -1.034 | 1.042 |
| gi_116004218_ref_NM_001077001.1   | 767928    | RBPJ                | recombination signal binding protein for immunoglobulin                    | Nucleus         | transcription regulator | VH | 1.689 | 0.004 | 1.042  | 1.151 | -1.195 | 0.527 |
| gi_119905866_ref_XM_615740.3      | 535632    | GTF2I               | TGF-beta-induced factor homeobox 2                                         | Nucleus         | transcription regulator | H  | 1.704 | 0.004 | -1.476 | 0.045 | -1.058 | 0.891 |
| gi_119917017_ref_XM_877865.2      | 509874    | GTF3C1              | general transcription factor IIIC, polypeptide 1, alpha 2                  | Nucleus         | transcription regulator | H  | 1.748 | 0.002 | -1.615 | 0.013 | -1.028 | 1.046 |
| gi_76611568_ref_XM_869196.1       | 617024    | E2F2                | E2F transcription factor 2                                                 | Nucleus         | transcription regulator | H  | 1.780 | 0.002 | -2.427 | 0.000 | -2.359 | 0.000 |
| gi_190360732_ref_NM_001128499.1   | 510050    | TGIF1               | TGF-beta-induced factor homeobox 1                                         | Nucleus         | transcription regulator | H  | 1.793 | 0.002 | 1.089  | 1.179 | -1.444 | 0.070 |
| gi_118151389_ref_NM_001077900.1   | 510814    | STAT1               | signal transducer and activator of transcription 1, 91kD                   | Nucleus         | transcription regulator | VH | 1.847 | 0.001 | 1.189  | 1.255 | 1.154  | 1.333 |
| gi_119889242_ref_XM_585895.3      | 509019    | ZBTB7B              | zinc finger and BTB domain containing 7B                                   | Nucleus         | transcription regulator | H  | 1.900 | 0.001 | -2.238 | 0.000 | 1.707  | 0.419 |
| gi_119904107_ref_XM_599033.3      | 493639    | PTGES2              | prostaglandin H synthase 2                                                 | Cytoplasm       | transcription regulator | H  | 1.917 | 0.001 | -1.753 | 0.002 | -1.995 | 0.001 |
| gi_106880502_ref_NM_001034770.2   | 540605    | CREM                | cAMP responsive element modulator                                          | Nucleus         | transcription regulator | H  | 1.919 | 0.001 | -1.359 | 0.144 | -1.403 | 0.103 |
| gi_119911776_ref_XM_590665.3      | 513045    | MYBBP1A             | MYB binding protein (P160) 1a                                              | Nucleus         | transcription regulator | VH | 1.927 | 0.001 | -2.545 | 0.000 | -2.738 | 0.000 |
| gi_154152114_ref_NM_001100336.1   | 510923    | TRIM25              | tripartite motif-containing 25                                             | Cytoplasm       | transcription regulator | VH | 1.957 | 0.001 | -1.054 | 0.953 | 1.074  | 1.262 |
| gi_119893790_ref_XM_608827.3      | 530358    | KLF3                | Kruppel-like factor 3 (basic)                                              | Nucleus         | transcription regulator | H  | 2.005 | 0.001 | 1.040  | 1.146 | 1.263  | 1.337 |
| gi_115497081_ref_NM_001075656.1   | 514246    | JUNB                | jun B proto-oncogene                                                       | Nucleus         | transcription regulator | H  | 2.028 | 0.001 | -3.199 | 0.000 | -2.049 | 0.000 |
| gi_119916372_ref_XM_616030.3      | 535916    | SMAD7               | SMAD family member 7                                                       | Nucleus         | transcription regulator | H  | 2.067 | 0.000 | 1.297  | 1.200 | 2.153  | 0.082 |
| gi_115497301_ref_NM_001076409.1   | 616115    | NFKB1               | nuclear factor of kappa light polypeptide gene enhancer 1, alpha           | Nucleus         | transcription regulator | VH | 2.141 | 0.000 | -1.398 | 0.093 | -1.145 | 0.698 |
| gi_60592797_ref_NM_001012673.1    | 282375    | STAT5A              | signal transducer and activator of transcription 5A                        | Nucleus         | transcription regulator | VH | 2.254 | 0.000 | -1.087 | 0.840 | 1.193  | 1.342 |
| gi_77735604_ref_NM_001034326.1    | 508638    | NOC2L               | nucleolar complex associated 2 homolog (S. cerevisiae)                     | Nucleus         | transcription regulator | VH | 2.327 | 0.000 | -1.498 | 0.032 | -1.790 | 0.004 |
| gi_77736398_ref_NM_001034727.1    | 541236    | XBP1                | X-box binding protein 1                                                    | Nucleus         | transcription regulator | H  | 2.404 | 0.000 | -2.298 | 0.000 | -1.747 | 0.006 |
| gi_115495324_ref_NM_001075935.1   | 530610    | ATF6                | activating transcription factor 6                                          | Cytoplasm       | transcription regulator | VH | 2.521 | 0.000 | -1.551 | 0.020 | -1.693 | 0.008 |
| gi_118601779_ref_NM_001079591.1   | 513983    | SCAND1              | SCAN domain containing 1                                                   | Nucleus         | transcription regulator | H  | 2.563 | 0.000 | -1.869 | 0.000 | -2.168 | 0.000 |
| gi_164519007_ref_NM_001113302.1   | 539361    | SREBF1              | sterol regulatory element binding transcription factor 1                   | Nucleus         | transcription regulator | H  | 2.595 | 0.000 | -7.844 | 0.000 | -2.673 | 0.000 |
| gi_77735420_ref_NM_001034231.1    | 505025    | ID2                 | inhibitor of DNA binding 2, dominant negative helix-loop-helix             | Nucleus         | transcription regulator | VH | 2.939 | 0.000 | 1.192  | 1.252 | 1.082  | 1.282 |

|                                  |        |         |                                                          |         |                         |    |        |       |        |       |        |       |
|----------------------------------|--------|---------|----------------------------------------------------------|---------|-------------------------|----|--------|-------|--------|-------|--------|-------|
| gi_119900643_ref_XM_604596.3_    | 526233 | EGR3    | early growth response 3                                  | Nucleus | transcription regulator | H  | 3.238  | 0.000 | -3.012 | 0.000 | -1.776 | 0.004 |
| gi_41386700_ref_NM_174726.1_     | 282713 | NFKBIZ  | nuclear factor of kappa light polypeptide gene enhance   | Nucleus | transcription regulator | H  | 3.766  | 0.000 | 1.912  | 0.102 | 1.945  | 0.183 |
| gi_67972412_ref_NM_001024929.1_  | 506945 | BHLHE40 | basic helix-loop-helix family, member e40                | Nucleus | transcription regulator | VH | 3.779  | 0.000 | 1.098  | 1.217 | 1.019  | 1.188 |
| gi_110347584_ref_NM_182786.2_    | 280795 | FOS     | FBJ murine osteosarcoma viral oncogene homolog           | Nucleus | transcription regulator | H  | 3.966  | 0.000 | -1.263 | 0.279 | -1.537 | 0.029 |
| gi_119901924_ref_XM_001251809.1_ | 515125 | SMAD3   | SMAD family member 3                                     | Nucleus | transcription regulator | H  | 4.105  | 0.000 | 1.177  | 1.249 | 1.416  | 1.060 |
| gi_119901328_ref_XM_618588.3_    | 538384 | PRDM1   | PR domain containing 1, with ZNF domain                  | Nucleus | transcription regulator | H  | 4.186  | 0.000 | -1.006 | 1.041 | 1.355  | 1.166 |
| gi_115495012_ref_NM_001075819.1_ | 521378 | CITED2  | Cbp/p300-interacting transactivator, with Glu/Asp-rich c | Nucleus | transcription regulator | H  | 5.909  | 0.000 | -2.431 | 0.000 | -2.881 | 0.000 |
| gi_119888839_ref_XM_869638.2_    | 617389 | RUNX3   | runt-related transcription factor 3                      | Nucleus | transcription regulator | H  | 8.600  | 0.000 | -1.414 | 0.084 | 1.562  | 0.689 |
| gi_156120848_ref_NM_001102101.1_ | 526392 | NFKB2   | nuclear factor of kappa light polypeptide gene enhance   | Nucleus | transcription regulator | H  | 9.354  | 0.000 | -2.838 | 0.000 | -1.390 | 0.123 |
| gi_119903790_ref_XM_864138.2_    | 509889 | FOSL2   | FOS-like antigen 2                                       | Nucleus | transcription regulator | H  | 12.227 | 0.000 | -1.035 | 0.922 | 1.401  | 1.087 |
