# Supplementary material for: A Bovine Lymphosarcoma Cell Line Infected with Theileria annulata Exhibits an Irreversible Reconfiguration of Host Cell Gene Expression
Source: PubMed Central journal article supplement (PMC3694138; doi:10.1371/journal.pone.0066833), 2013-06-26
Supplement: pone.0066833.s011.pdf [file pone.0066833.s011.pdf]

**Table S9: Transcription regulators predicted to be either activated or inhibited in untreated TBL20 (A) OR at 24h (B) OR 48h (C) following exposure to BW720c**

**A. Activated or Inhibited in TBL20 compared to BL20**

| Regulator | Predicted Activation Status in TBL20 | z-score | p-value                 | Target gene ratio |
|-----------|--------------------------------------|---------|-------------------------|-------------------|
| STAT2     | Activated                            | 2.569   | 1.15x10 <sup>-4*</sup>  | 9/12              |
| CREB1     | Activated                            | 2.508   | 3.45x10 <sup>-6*</sup>  | 24/51             |
| CEBPB     | Activated                            | 2.450   | 7.65x10 <sup>-5*</sup>  | 30/59             |
| STAT4     | Activated                            | 2.337   | 5.84x10 <sup>-10*</sup> | 40/58             |
| TP63      | Activated                            | 2.212   | 5.02x10 <sup>-6*</sup>  | 13/18             |
| MTPN      | Activated                            | 2.122   | 1.58x10 <sup>-2</sup>   | 15/17             |
| RUNX3     | Inhibited                            | -2.038  | 3.57x10 <sup>-2</sup>   | 4/8               |
| RUNX1     | Inhibited                            | -2.123  | 1.70x10 <sup>-2</sup>   | 4/6               |
| NKX2-1    | Inhibited                            | -2.205  | 7.66x10 <sup>-3</sup>   | 4/31              |
| KDM5B     | Inhibited                            | -2.239  | 6.91x10 <sup>-3</sup>   | 18/23             |
| POU2AF1   | Inhibited                            | -2.261  | 1.41x10 <sup>-3</sup>   | 5/12              |
| SOX2      | Inhibited                            | -2.280  | 1.87x10 <sup>-2</sup>   | 7/13              |
| TCF4      | Inhibited                            | -2.360  | 3.74x10 <sup>-2</sup>   | 5/10              |
| MYB       | Inhibited                            | -2.419  | 1.54x10 <sup>-3</sup>   | 9/16              |
| NR3C1     | Inhibited                            | -2.487  | 6.53x10 <sup>-14*</sup> | 33/131            |
| EBF1      | Inhibited                            | -2.653  | 7.71x10 <sup>-2</sup>   | 5/6               |
| PAX5      | Inhibited                            | -2.796  | 2.68x10 <sup>-4*</sup>  | 7/11              |
| HDAC      | Inhibited                            | -2.873  | 8.60x10 <sup>-6*</sup>  | 13/16             |

**B. Activated or Inhibited in TBL20 at 24h BW720c compared to untreated TBL20 control**

---

| <b>Regulator</b> | <b>Predicted Activation Status in TBL20 24h BW720c</b> | <b>z-score</b> | <b>p-value</b>         | <b>Target gene ratio</b> |
|------------------|--------------------------------------------------------|----------------|------------------------|--------------------------|
| CREBBP           | Activated                                              | 2.425          | $9.02 \times 10^{-2}$  | 12/21                    |
| IRF9             | Activated                                              | 2.383          | $2.14 \times 10^{-4*}$ | 6/9                      |
| CEBPD            | Activated                                              | 2.123          | $4.00 \times 10^{-1}$  | 4/5                      |
| FLI1             | Inhibited                                              | -2.047         | $1.64 \times 10^{-1}$  | 5/6                      |
| SP1              | Inhibited                                              | -2.067         | $9.35 \times 10^{-3}$  | 18/51                    |
| ATF4             | Inhibited                                              | -2.188         | $5.89 \times 10^{-3}$  | 9/16                     |
| NR1H3            | Inhibited                                              | -2.320         | $7.35 \times 10^{-5*}$ | 12/17                    |
| IFI16            | Inhibited                                              | -2.391         | $7.81 \times 10^{-2}$  | 8/9                      |
| ETS1             | Inhibited                                              | -2.671         | $8.69 \times 10^{-3}$  | 10/23                    |

---

### C. Activated or Inhibited in TBL20 at 48h BW720c compared to TBL20 control

| Regulator                | Predicted Activation Status in TBL20 48h BW720c | z-score | p-value                | Target gene ratio |
|--------------------------|-------------------------------------------------|---------|------------------------|-------------------|
| CDKN2A                   | Activated                                       | 3.703   | 1.32x10 <sup>-5*</sup> | 32/40             |
| TP53 (includes EG:22059) | Activated                                       | 2.726   | 9.09x10 <sup>-9*</sup> | 74/162            |
| RB1                      | Activated                                       | 2.656   | 7.48x10 <sup>-4*</sup> | 16/41             |
| Rb                       | Activated                                       | 2.545   | 1.59x10 <sup>-1</sup>  | 8/8               |
| NR4A2                    | Activated                                       | 2.469   | 4.17x10 <sup>-1</sup>  | 5/5               |
| SIRT1                    | Activated                                       | 2.433   | 5.26x10 <sup>-3</sup>  | 10/14             |
| SPI1 (includes EG:20375) | Activated                                       | 2.418   | 9.37x10 <sup>-8*</sup> | 14/38             |
| BCL3                     | Activated                                       | 2.412   | 1.64x10 <sup>-2</sup>  | 6/7               |
| Stat3-Stat3              | Activated                                       | 2.240   | 1.76x10 <sup>-1</sup>  | 4/4               |
| MEF2A                    | Activated                                       | 2.200   | 7.57x10 <sup>-2</sup>  | 4/5               |
| MYOG                     | Activated                                       | 2.185   | 1.20x10 <sup>-1</sup>  | 4/5               |
| IRF1 (includes EG:16362) | Activated                                       | 2.137   | 1.15x10 <sup>-6*</sup> | 19/32             |
| SOX9                     | Activated                                       | 2.131   | 3.94x10 <sup>-1</sup>  | 4/5               |
| MITF                     | Activated                                       | 2.119   | 6.86x10 <sup>-2</sup>  | 11/20             |
| MEF2D                    | Activated                                       | 2.097   | 1.61x10 <sup>-3</sup>  | 4/6               |
| AR                       | Activated                                       | 2.070   | 1.58x10 <sup>-2</sup>  | 16/34             |
| TOB1                     | Activated                                       | 2.061   | 8.84x10 <sup>-2</sup>  | 7/8               |
| RUNX2                    | Activated                                       | 2.038   | 5.83x10 <sup>-2</sup>  | 7/11              |
| MEF2C                    | Activated                                       | 2.027   | 1.50x10 <sup>-1</sup>  | 5/7               |
| MED1 (includes EG:19014) | Inhibited                                       | -2.002  | 4.28x10 <sup>-1</sup>  | 5/7               |
| DDIT3                    | Inhibited                                       | -2.047  | 2.49x10 <sup>-2</sup>  | 5/7               |
| CCNE1                    | Inhibited                                       | -2.053  | 1.95x10 <sup>-2</sup>  | 5/5               |
| NR1H3                    | Inhibited                                       | -2.078  | 4.94x10 <sup>-4*</sup> | 12/18             |
| E2F2                     | Inhibited                                       | -2.133  | 5.93x10 <sup>-4*</sup> | 6/15              |
| E2F3                     | Inhibited                                       | -2.251  | 4.54x10 <sup>-5*</sup> | 7/18              |
| E2F1                     | Inhibited                                       | -2.346  | 1.64x10 <sup>-2</sup>  | 26/48             |
| PPARGC1A                 | Inhibited                                       | -2.353  | 2.55x10 <sup>-2</sup>  | 16/21             |
| IFI16                    | Inhibited                                       | -2.570  | 1.35x10 <sup>-1</sup>  | 9/10              |
| NFE2L2                   | Inhibited                                       | -3.120  | 1.11x10 <sup>-5*</sup> | 47/65             |
